# Supplementary material
Source: PubMed Central journal article supplement (PMC4338906)
Supplement: JVI.02590-14_zjv999090067so1.pdf [file JVI.02590-14_zjv999090067so1.pdf]

*Supplemental file 1*

**Adaptation of Pandemic H2N2 Influenza A Viruses in Humans**

**Running title:** Genetic analysis of H2N2 influenza A viruses

Udayan Joseph<sup>1\*</sup>, Martin Linster<sup>1,2\*</sup>, Yuka Suzuki<sup>1</sup>, Scott Krauss<sup>3</sup>, Rebecca A. Halpin<sup>4</sup>,  
Dhanasekaran Vijaykrishna<sup>1,5</sup>, Thomas Fabrizio<sup>3</sup>, Theo M. Bestebroer<sup>2</sup>, Sebastian  
Maurer-Stroh<sup>6,7</sup>, Richard J. Webby<sup>3</sup>, David E. Wentworth<sup>4†</sup>, Ron A.M. Fouchier<sup>2</sup>,  
Justin Bahl<sup>1,8#</sup>, Gavin J.D. Smith<sup>1,9#</sup>, and members of the CEIRS H2N2 Working  
Group

<sup>1</sup>Duke-NUS Graduate Medical School, 8 College Road, Singapore 169857.

<sup>2</sup>Department of Viroscience, Erasmus Medical Center, Rotterdam, The Netherlands.

<sup>3</sup>Virology Division, Department of Infectious Diseases, St. Jude Children's Research  
Hospital, Memphis, TN 38015. <sup>4</sup>J. Craig Venter Institute, Rockville, MD 20850.

<sup>5</sup>Yong Loo Lin School of Medicine, National University of Singapore, Singapore.

<sup>6</sup>Bioinformatics Institute, Agency for Science, Technology and Research, Singapore.

<sup>7</sup>School of Biological Sciences, Nanyang Technological University, Singapore.

<sup>8</sup>Center for Infectious Diseases, The University of Texas School of Public Health,

Houston, TX 77030. <sup>9</sup>Duke Global Health Institute, Duke University, Durham, NC  
27710.

<sup>†</sup>Current address: Influenza Division, National Center for Immunization and  
Respiratory Diseases, Centers for Disease Control and Prevention, Atlanta, GA 30333

\*U.J. and M.L. contributed equally to this work. <sup>#</sup>To whom correspondence should be  
addressed: [Justin.Bahl@uth.tmc.edu](mailto:Justin.Bahl@uth.tmc.edu) and [gavin.smith@duke-nus.edu.sg](mailto:gavin.smith@duke-nus.edu.sg)

## Supplemental Text 1 : Full Methods Summary

**Virus Sequencing.** The complete genomes of the influenza viruses were sequenced using a high-throughput Next-generation sequencing pipeline at the JCVI that includes the 454/Roche GS-FLX and the Illumina HiSeq™ 2000. Viral RNA was isolated using the ZR 96 Viral RNA kit (Zymo Research Corporation, Irvine, CA, USA). The influenza A genomic RNA segments were simultaneously amplified from 3 µL of purified RNA using a multi-segment RT-PCR strategy (1, 2). The influenza M-RT-PCR amplicons were barcoded and amplified using an optimized SISPA protocol (3-5). Subsequently, the SISPA amplicons were purified, pooled and size selected (~800 bp or ~200 bp) and the pools were used for both Roche 454 (Roche Diagnostics Corporation, Indianapolis, IN) and Illumina (Illumina, Inc., San Diego, CA, USA) library construction (~50) viruses per library. Samples were sequenced on the 454/Roche-FLX and Illumina HiSeq2000 platforms. Libraries were prepared for sequencing on the 454/Roche GS-FLX platform using Titanium chemistry or for sequencing on the Illumina HiSeq™ 2000. The sequence reads were sorted by barcode, trimmed, searched by TBLASTX against custom nucleotide databases of full-length influenza A segments downloaded from GenBank to filter out both chimeric influenza sequences and non-influenza sequences amplified during the random hexamer-primed amplification. The reads binned by segment, and Illumina reads were de novo assembled using CLC Bio's `clc_novo_assemble` program. The resulting contigs were searched against the corresponding custom full-length Influenza segment nucleotide database to find the closest reference sequence for each segment. Both 454/Roche GS-FLX and Illumina HiSeq™ 2000 reads were then mapped to the selected reference influenza A virus segments using the

clc\_ref\_assemble\_long program. At loci where both GS-FLX and Illumina sequence data agreed on a variation (as compared to the reference sequence), the reference sequence was updated to reflect the difference. A final mapping of all next-generation sequences to the updated reference sequences was then performed. Any regions of the viral genomes that were poorly covered or ambiguous after Next Generation sequencing were amplified and sequenced using standard Sanger sequencing approach. The consensus sequences were deposited in GenBank (Table S1).

**Sequence Selection for Phylogenetic Analysis.** We downloaded complete influenza A gene segments of different subtypes and of different host origin from NCBI Influenza database on 28 November 2013. 11285 sequences were downloaded, supplemented by full genomes of 175 isolates newly sequenced for this project, adding to a total of 12685 sequences used. Nucleotide sequences of the coding regions of each of the segments were aligned using MAFFT (6) and were further manually adjusted and assembled to only include coding regions of each gene segment.

**Phylogenetic Analysis.** Maximum likelihood trees for the large dataset were inferred based on nucleotide alignments using the program FastTree 2.1.5 under the generalized time reversible (GTR) model with gamma-distributed rates among sites (GTR+ $\Gamma$ ) (7). To conduct a temporal phylogenetic analysis, sequences were also downloaded with associated meta-data of date of isolation. If the exact day and month of the year was not available, sequences were given a mid-year root. However, since we were interested in the adaptation involved in the host species jump, greater temporal resolution was required for the first year of pandemic transmission. Hence, dates of isolation were extrapolated (to month of transmission) from available epidemiological and scientific reports of the period (8-10). Temporal phylogenies and

rates of evolution were inferred with the program BEASTv1.8.0 using a relaxed clock model that allows rates to vary among lineages within a Bayesian Markov chain Monte Carlo (MCMC) framework (11). This method was used to sample phylogenies and dates of divergences between viruses from their joint posterior distribution, in which the sequences are constrained by their known date of sampling. For the analyses using Bayesian MCMC sampling, in all cases chain lengths of at least 100 million steps were used and a 10-20% 'burn-in' was removed. At least two independent runs of each were performed and compared or combined to ensure adequate sampling.

**Reassortment Analysis.** Reassortment within the H2N2 pandemic clade (n=49) was evaluated by comparing the patristic distances of trees estimated independently for each gene segment. A distance matrix was calculated from the posterior distributions of a sample of 500 trees obtained from a MCMC analysis with a GTR+G substitution model as described above. The resulting distance matrix was visualized with a multi-dimensional scaling plot to characterize the phylogenetic relationships between the gene segments using the R statistical software package (12).

**Selection Analysis.** To determine the degree of natural selection, the ratio of nonsynonymous ( $dN$ ) and synonymous ( $dS$ ) substitutions per codon ( $dN/dS$  ratio) were estimated for the entire tree (global model) using single-likelihood ancestor counting (SLAC) method (13), implemented through the Datamonkey webserver (14). The selection pressures acting on the internal and external branches of the tree were measured using the 2-ratio model of the CODEML program in the PAML suite (15). Selection on specific sites was analyzed using two methodologies and sites were considered relevant if both methods detected the same positively selected codons. The first method used was the mixed effects model of evolution (MEME), which is a

useful tool in the detection of both fixed and episodic diversifying selection between branches (16). A  $p$  value of 0.05 was used as a statistical cutoff for a positively selected site in this method. The second method used to detect specific sites undergoing selective pressure was employed through the Tdg09 program (17), which allows for the definition of host-specific lineages to determine sites that contribute to the host-shift event. Sites with a false discovery rate (fdr) less than 0.05 was used reported as significant in this method.

**Uracil and CpG Content.** The nucleotide content of pandemic H2N2 gene segments were assessed to determine adaptation levels of adaptation in a human/mammalian hosts. To estimate the observed to expected CpG ratios, a custom perl script was executed using the following formula:  $100 * ('CG' / (G * C) * (A + U + G + C))$ , where A, U, G, C represents the counts of the respective nucleotides and 'CG' the number of adjacent C and G representing the CpG pattern (18). Uracil content values were measured using PAUP\* 4.0b10 (19), as it has been postulated that the uracil content of the Influenza A virus genomes tends to increase steadily in mammalian hosts (20, 21). Uracil content values and CpG ratios were visualized and plotted using the R statistical software package (12).

**Positions of Positively Selected Sites in HA Structure.** The positions identified as significant positively selected sites were plotted on the crystal structure of the A/Singapore/1/1957(H2N2) virus HA [PDB accession code 2WR7] using MacPyMOL (The PyMOL Molecular Graphics System, Version 1.3, Schrödinger, LLC) for visualization of the trimer.

## References

1. **Zhou B, Donnelly ME, Scholes DT, St George K, Hatta M, Kawaoka Y, Wentworth DE.** 2009. Single-reaction genomic amplification accelerates sequencing and vaccine production for classical and Swine origin human influenza A viruses. *J Virol* **83**:10309-10313.
2. **Zhou JP, Ge FF, Liu J, Ju HB, Yang DQ, Wang J, Zhang WY, Liu PH.** 2012. Epidemiological survey and genetic evolution of H9 subtype influenza viruses in Shanghai, China, from 2006 to 2010. *Arch Virol* **157**:1193-1198.
3. **Djikeng A, Halpin R, Kuzmickas R, Depasse J, Feldblyum J, Sengamalay N, Afonso C, Zhang X, Anderson NG, Ghedin E, Spiro DJ.** 2008. Viral genome sequencing by random priming methods. *BMC Genomics* **9**:5.
4. **Djikeng A, Kuzmickas R, Anderson NG, Spiro DJ.** 2009. Metagenomic analysis of RNA viruses in a fresh water lake. *PLoS One* **4**:e7264.
5. **Depew J, Zhou B, McCarrison JM, Wentworth DE, Purushe J, Koroleva G, Fouts DE.** 2013. Sequencing viral genomes from a single isolated plaque. *Virol J* **10**:181.
6. **Katoh K, Misawa K, Kuma K, Miyata T.** 2002. MAFFT: a novel method for rapid multiple sequence alignment based on fast Fourier transform. *Nucleic Acids Res* **30**:3059-3066.
7. **Price MN, Dehal PS, Arkin AP.** 2010. FastTree 2--approximately maximum-likelihood trees for large alignments. *PLoS One* **5**:e9490.

8. **Langmuir AD, Pizzi M, Trotter WY, Dunn FL.** 1958. [Asian influenza surveillance]. *Public Health Rep* **73**:114-120.
9. **Dunn FL.** 1958. Pandemic influenza in 1957; review of international spread of new Asian strain. *J Am Med Assoc* **166**:1140-1148.
10. **Fukumi H.** 1959. Summary report on the Asian influenza epidemic in Japan, 1957. *Bull World Health Organ* **20**:187-198.
11. **Drummond AJ, Suchard MA, Xie D, Rambaut A.** 2012. Bayesian phylogenetics with BEAUti and the BEAST 1.7. *Mol Biol Evol* **29**:1969-1973.
12. **R Core Team.** 2013. R: A language and environment for statistical computing, 3.0.2 ed. R Foundation for Statistical Computing, Vienna, Austria.
13. **Kosakovsky Pond SL, Frost SD.** 2005. Not so different after all: a comparison of methods for detecting amino acid sites under selection. *Mol Biol Evol* **22**:1208-1222.
14. **Delpont W, Poon AF, Frost SD, Kosakovsky Pond SL.** 2010. Datamonkey 2010: a suite of phylogenetic analysis tools for evolutionary biology. *Bioinformatics* **26**:2455-2457.
15. **Yang Z.** 2007. PAML 4: phylogenetic analysis by maximum likelihood. *Mol Biol Evol* **24**:1586-1591.
16. **Murrell B, Wertheim JO, Moola S, Weighill T, Scheffler K, Kosakovsky Pond SL.** 2012. Detecting individual sites subject to episodic diversifying selection. *PLoS Genet* **8**:e1002764.

17. **Tamuri AU, Dos Reis M, Hay AJ, Goldstein RA.** 2009. Identifying changes in selective constraints: host shifts in influenza. *PLoS Comput Biol* **5**:e1000564.
18. **Gardiner-Garden M, Frommer M.** 1987. CpG islands in vertebrate genomes. *J Mol Biol* **196**:261-282.
19. **Swofford DL.** 2003. PAUP\*. Phylogenetic Analysis Using Parsimony (\*and Other Methods), Version 4 ed. Sinauer Associates, Sunderland, Massachusetts.
20. **Rabadan R, Levine AJ, Robins H.** 2006. Comparison of avian and human influenza A viruses reveals a mutational bias on the viral genomes. *J Virol* **80**:11887-11891.
21. **Worobey M, Han GZ, Rambaut A.** 2014. A synchronized global sweep of the internal genes of modern avian influenza virus. *Nature* **508**:254-257.



**Supplementary Figure S1:** Maximum likelihood (ML) trees of the PB2 (A), PB1 (B), PA (C), HA (D), NP (E), NA (F), M (G), and NS (H) segments used in this study. ML trees inferred using FastTree v2.1.5 under the generalized time reversible (GTR) nucleotide substitution model for all 8 segments of Influenza A isolates. Human H2N2 isolates represented in blue; human H3N2 isolates represented in orange; human H1N1 isolates represented in brown; all swine isolates represented in green; and all avian isolates represented in black. Isolates used for further temporal phylogenetic and selection analyses indicated by large bracket lines. Images can be zoomed in to visualize details.

**PB2 (n=1263)**

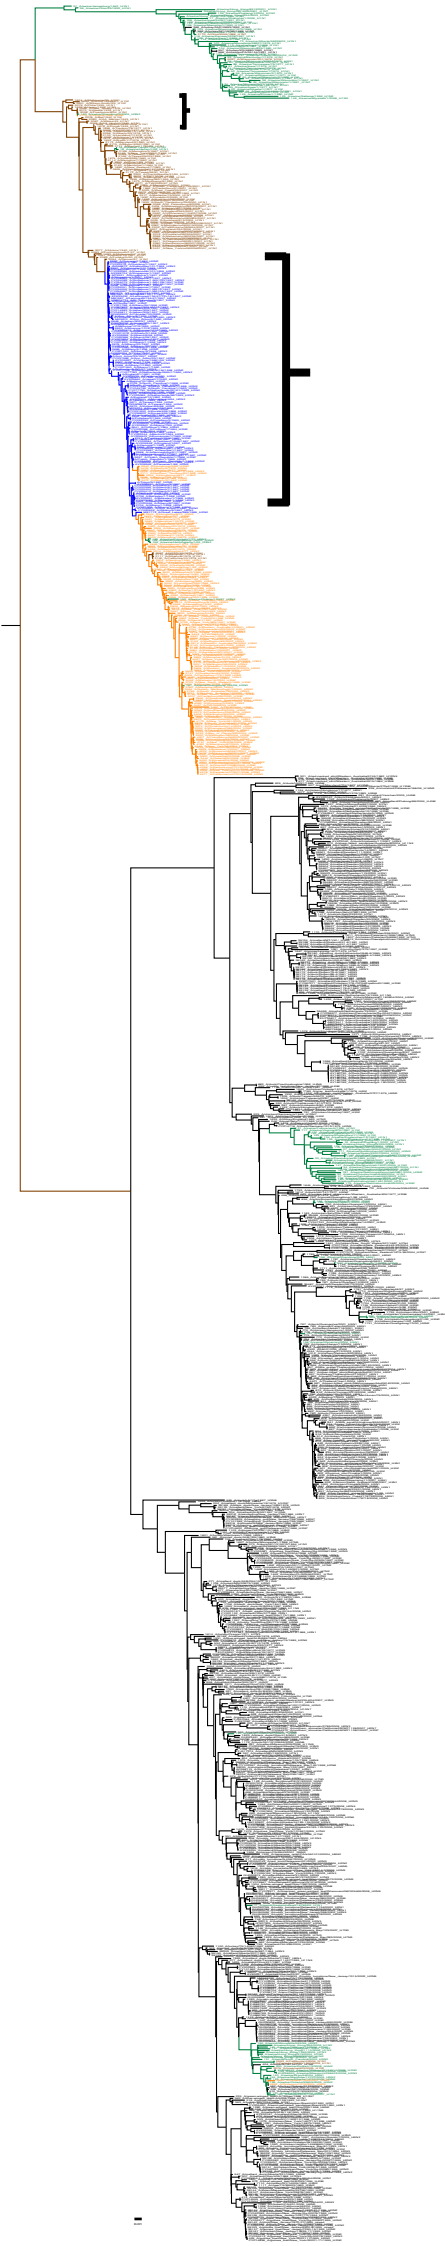

PB1 (n=1236)

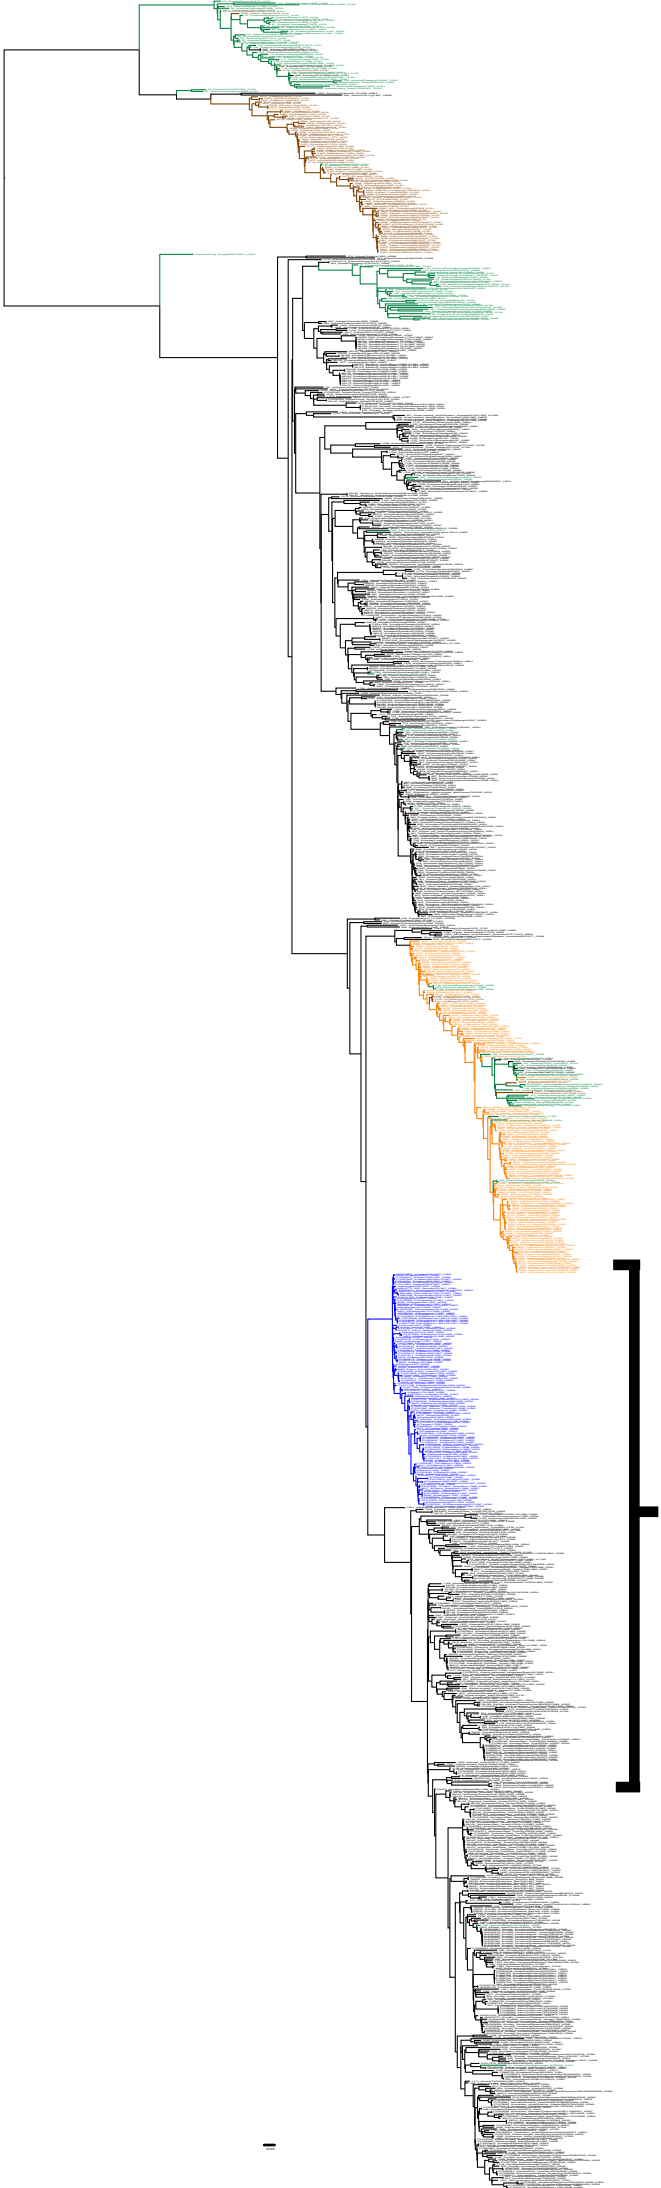

PA (n=1264)

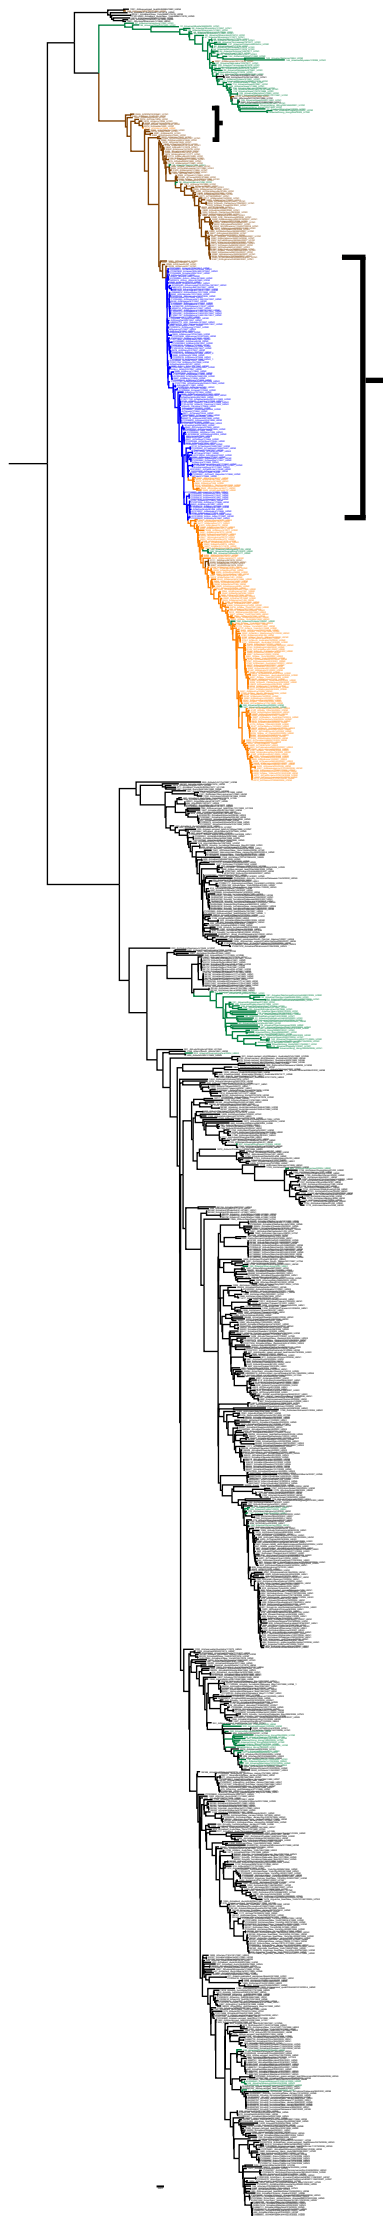

# HA (n=472)

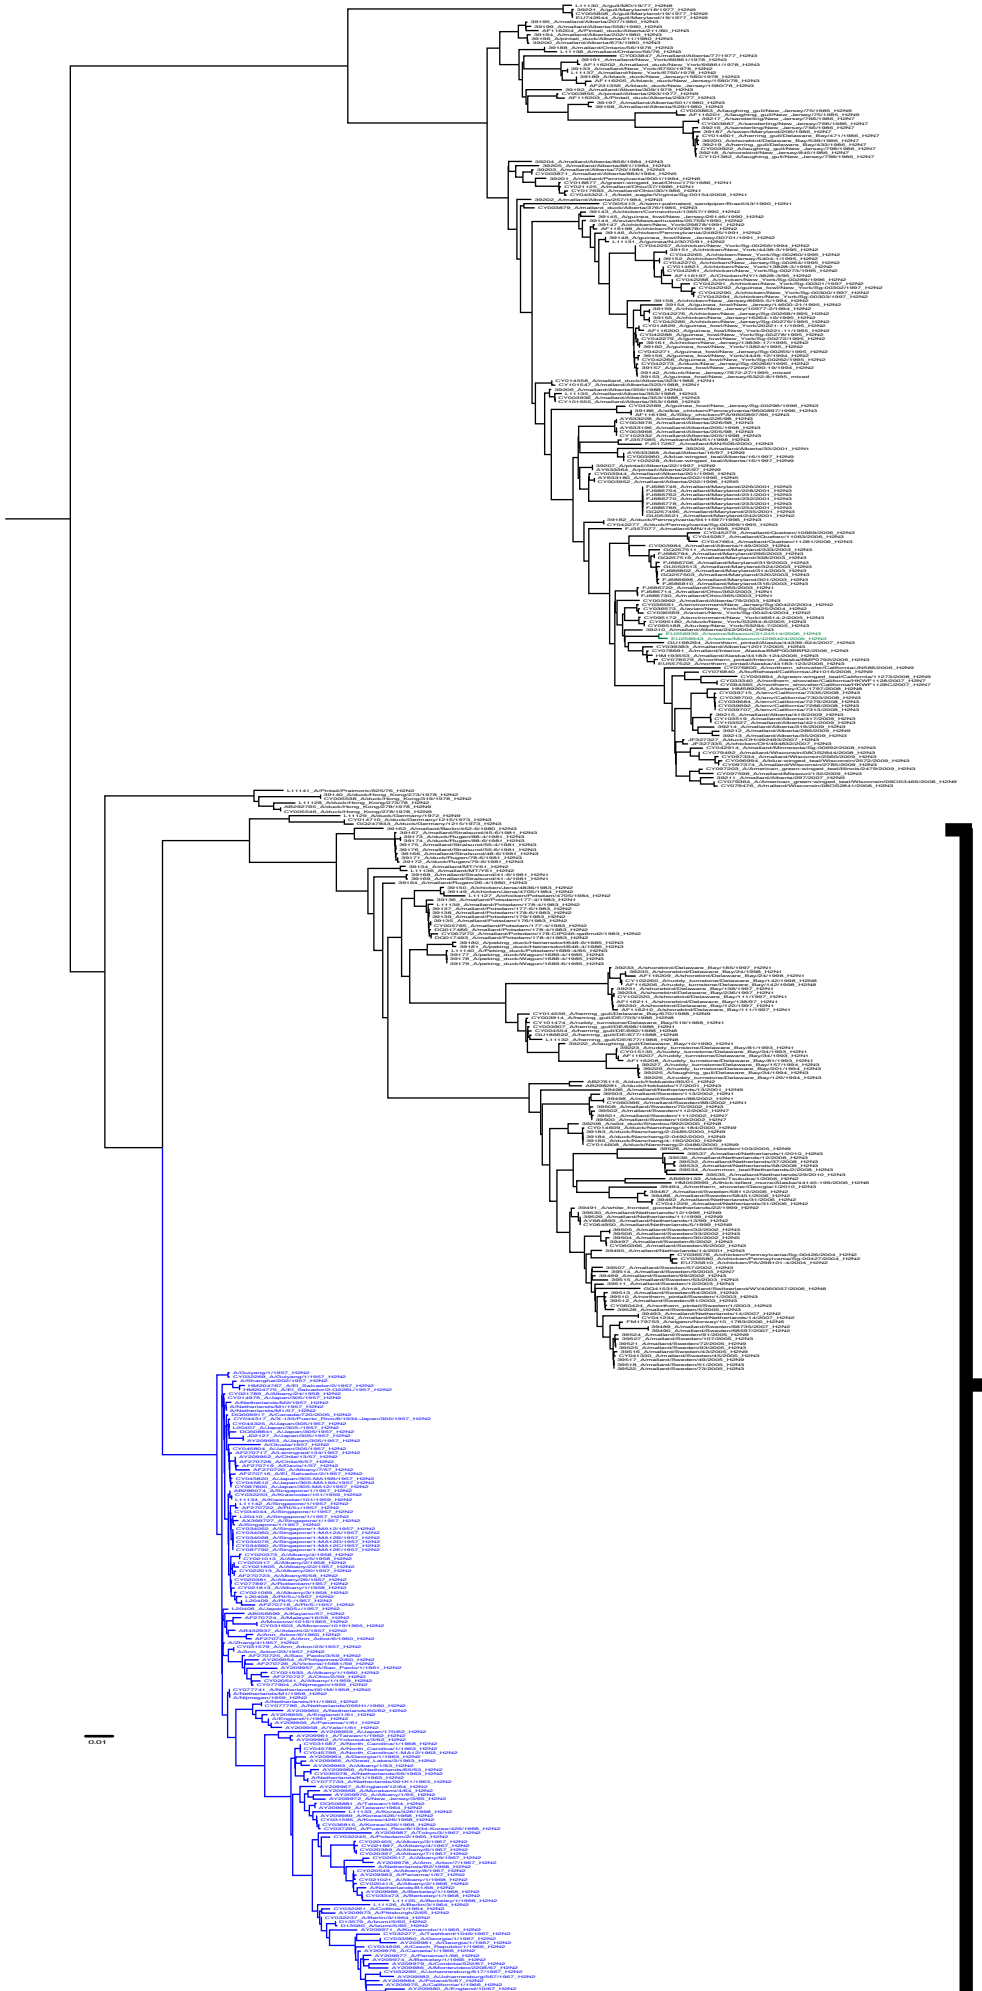

NP (n=1262)

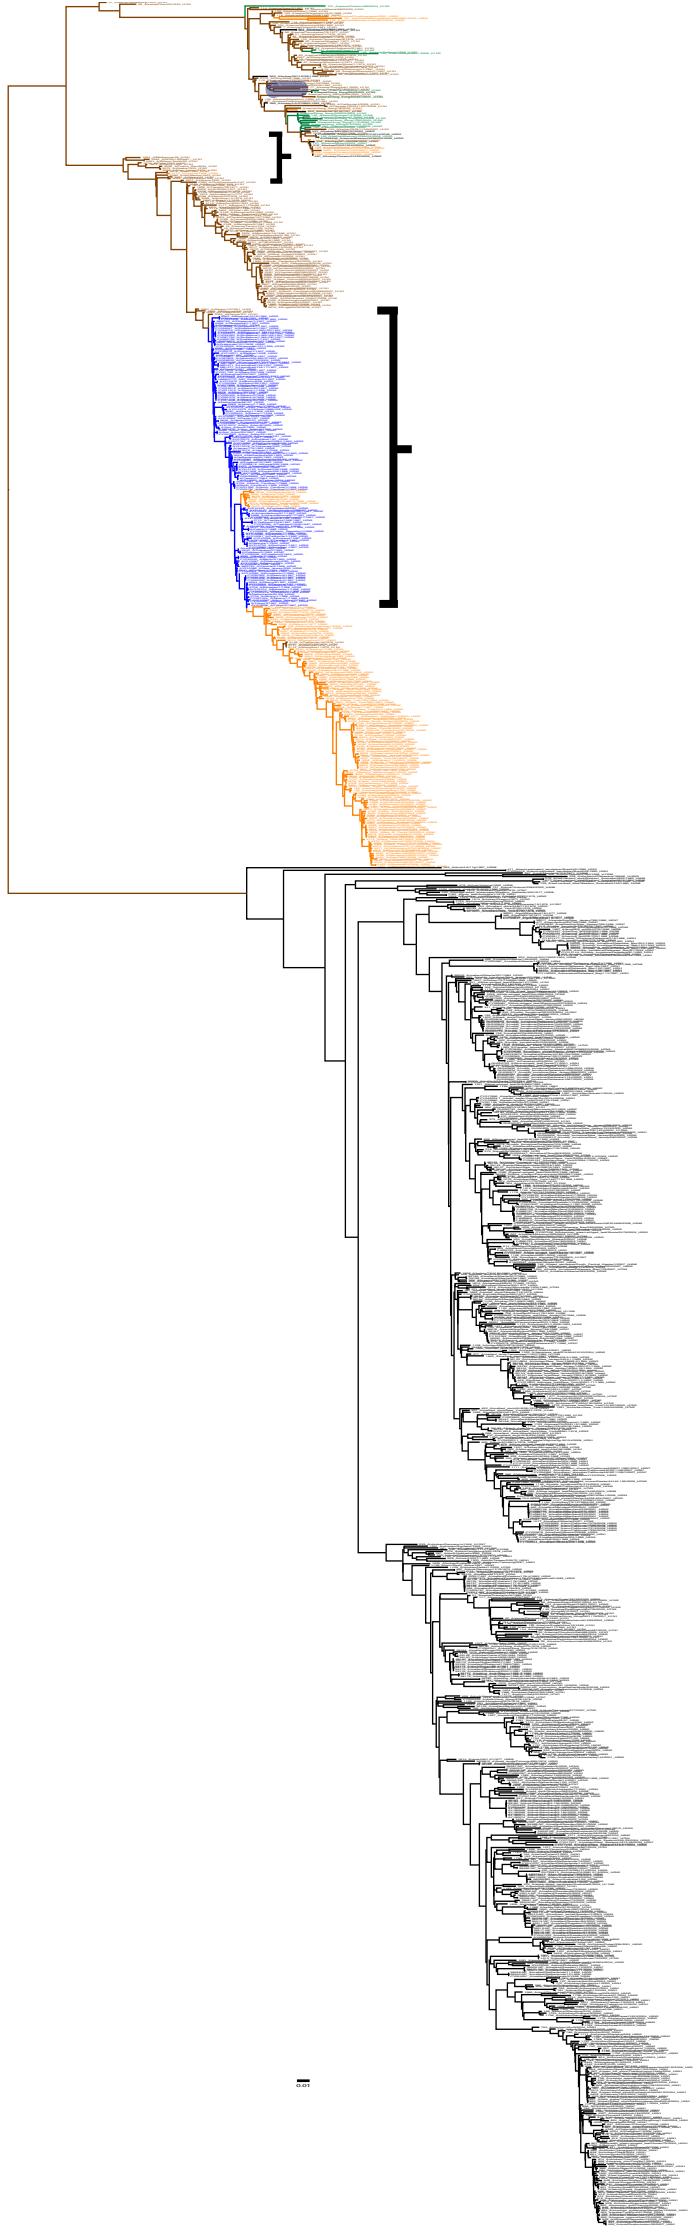

NA (n=3342)

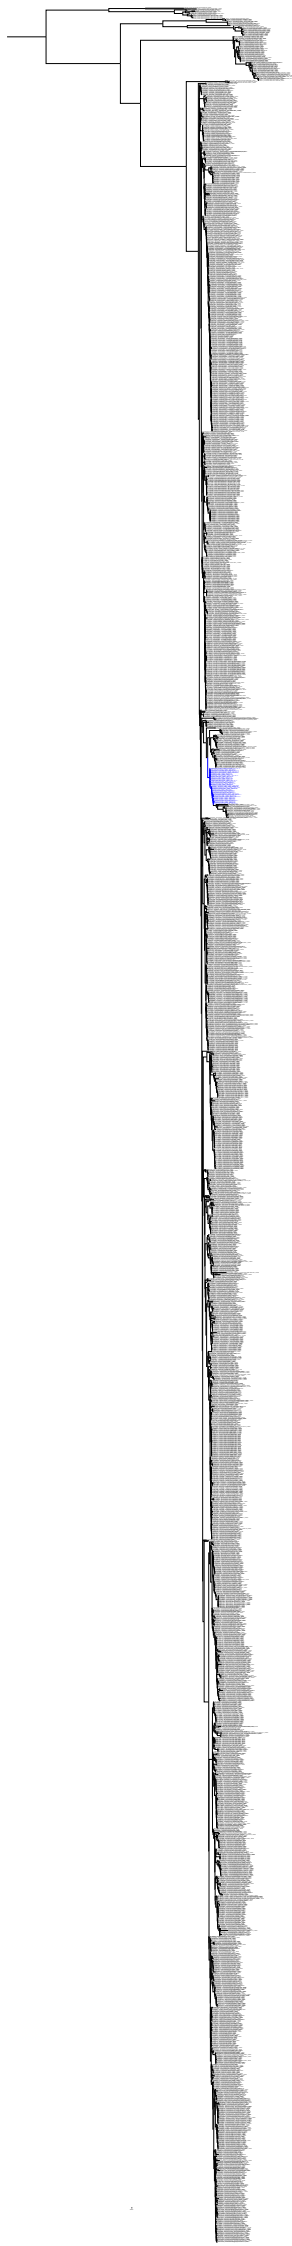

]

MP (n=1312)

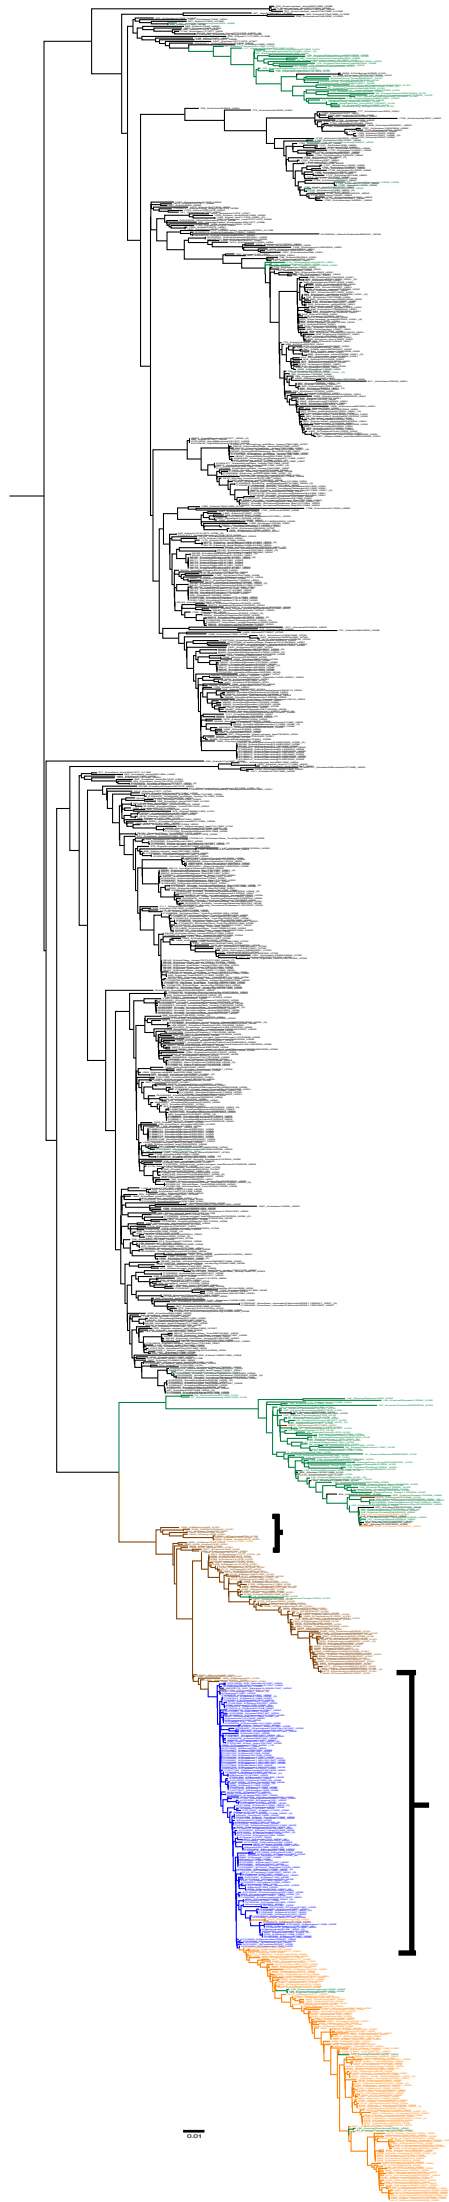



NS (n=1263)

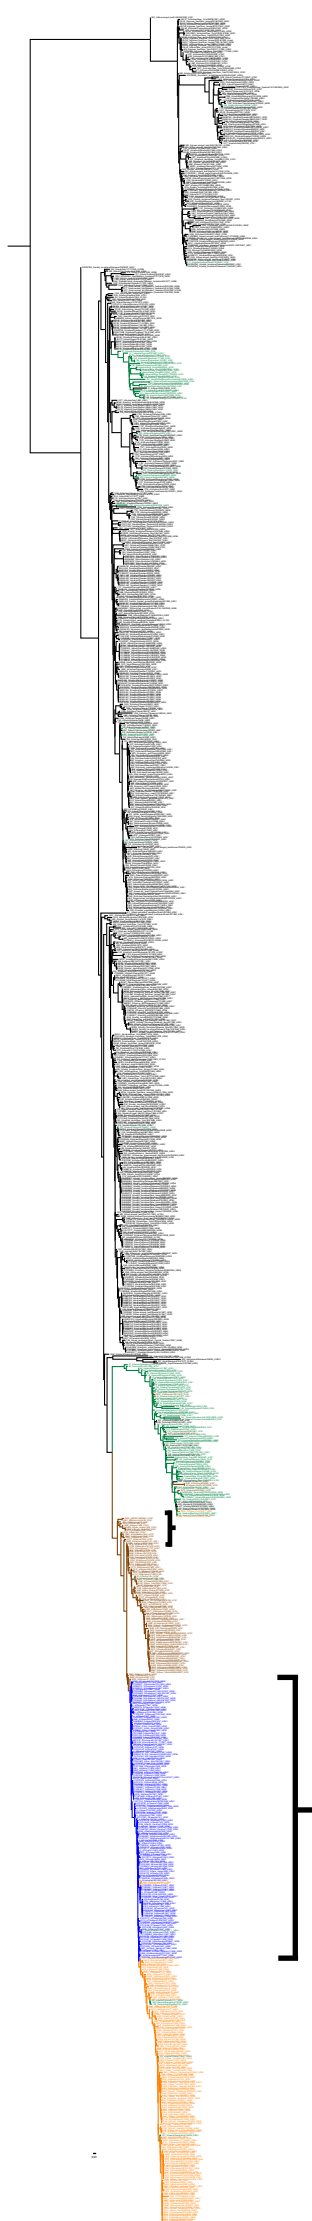

**Figure S2: Temporal Phylogenies** of human H2N2 (blue) virus gene segments and their associated avian H2N2 (brown) or human H1N1 (black) sister clades. Swine sequences denoted in green. Temporal phylogenies inferred using an uncorrelated log-normal distribution (ucln) clock model and a Gaussian Markov random field (GMRF) Bayesian skyride coalescent tree prior. Blue horizontal bars at nodes represent the 95% HPDs of TMRCAs

PB2 (n=105)

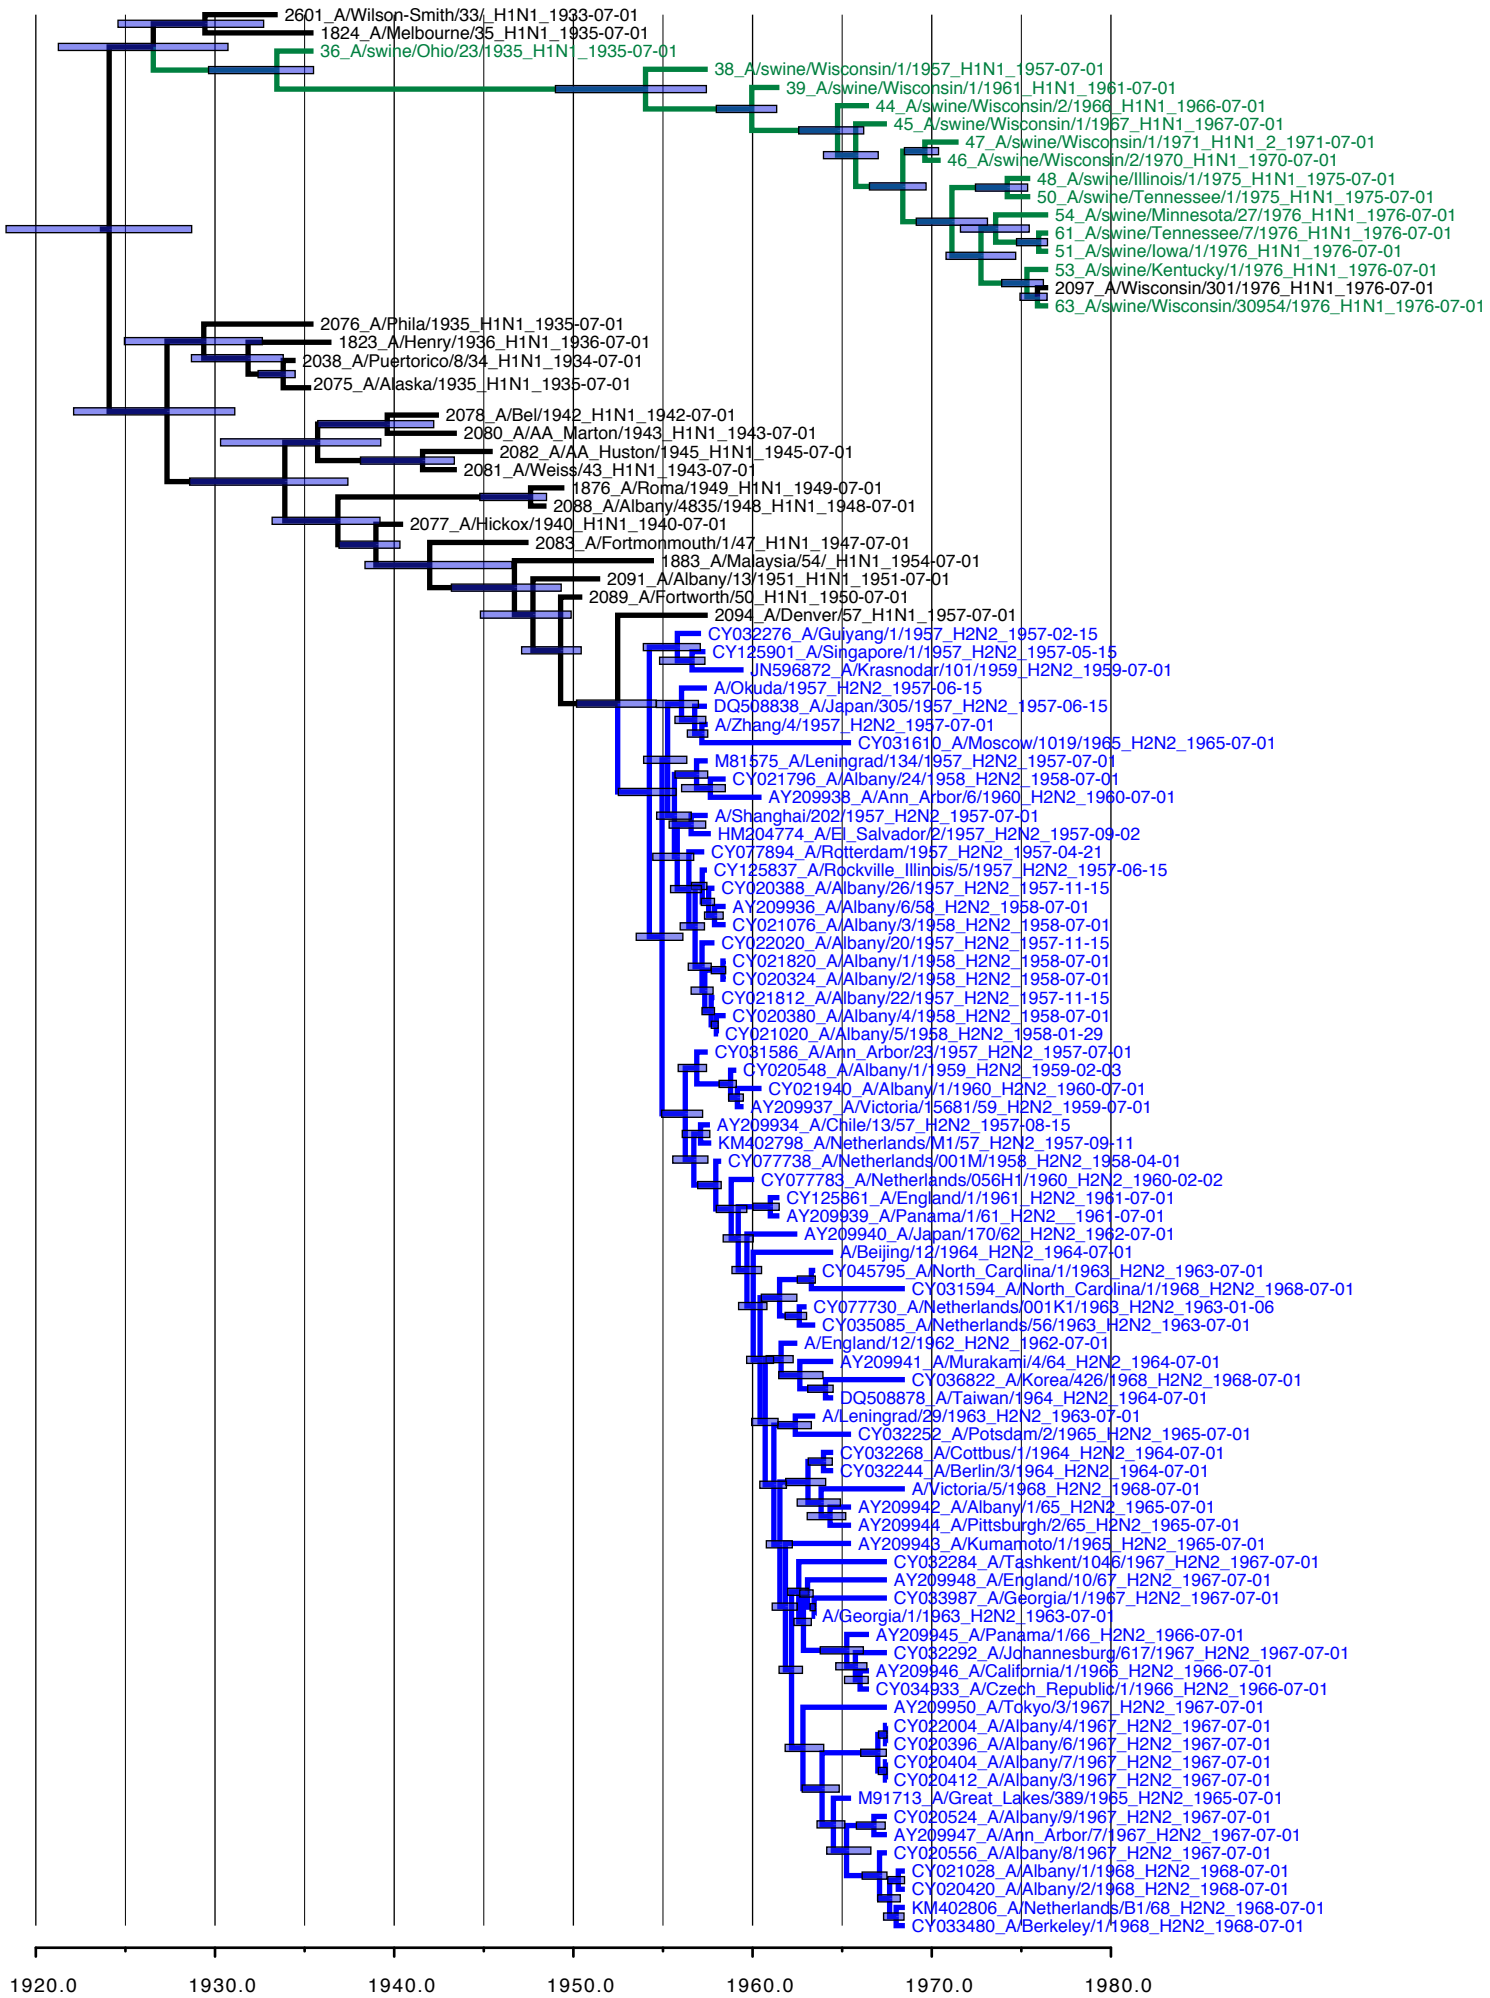

PB1 (n=187)

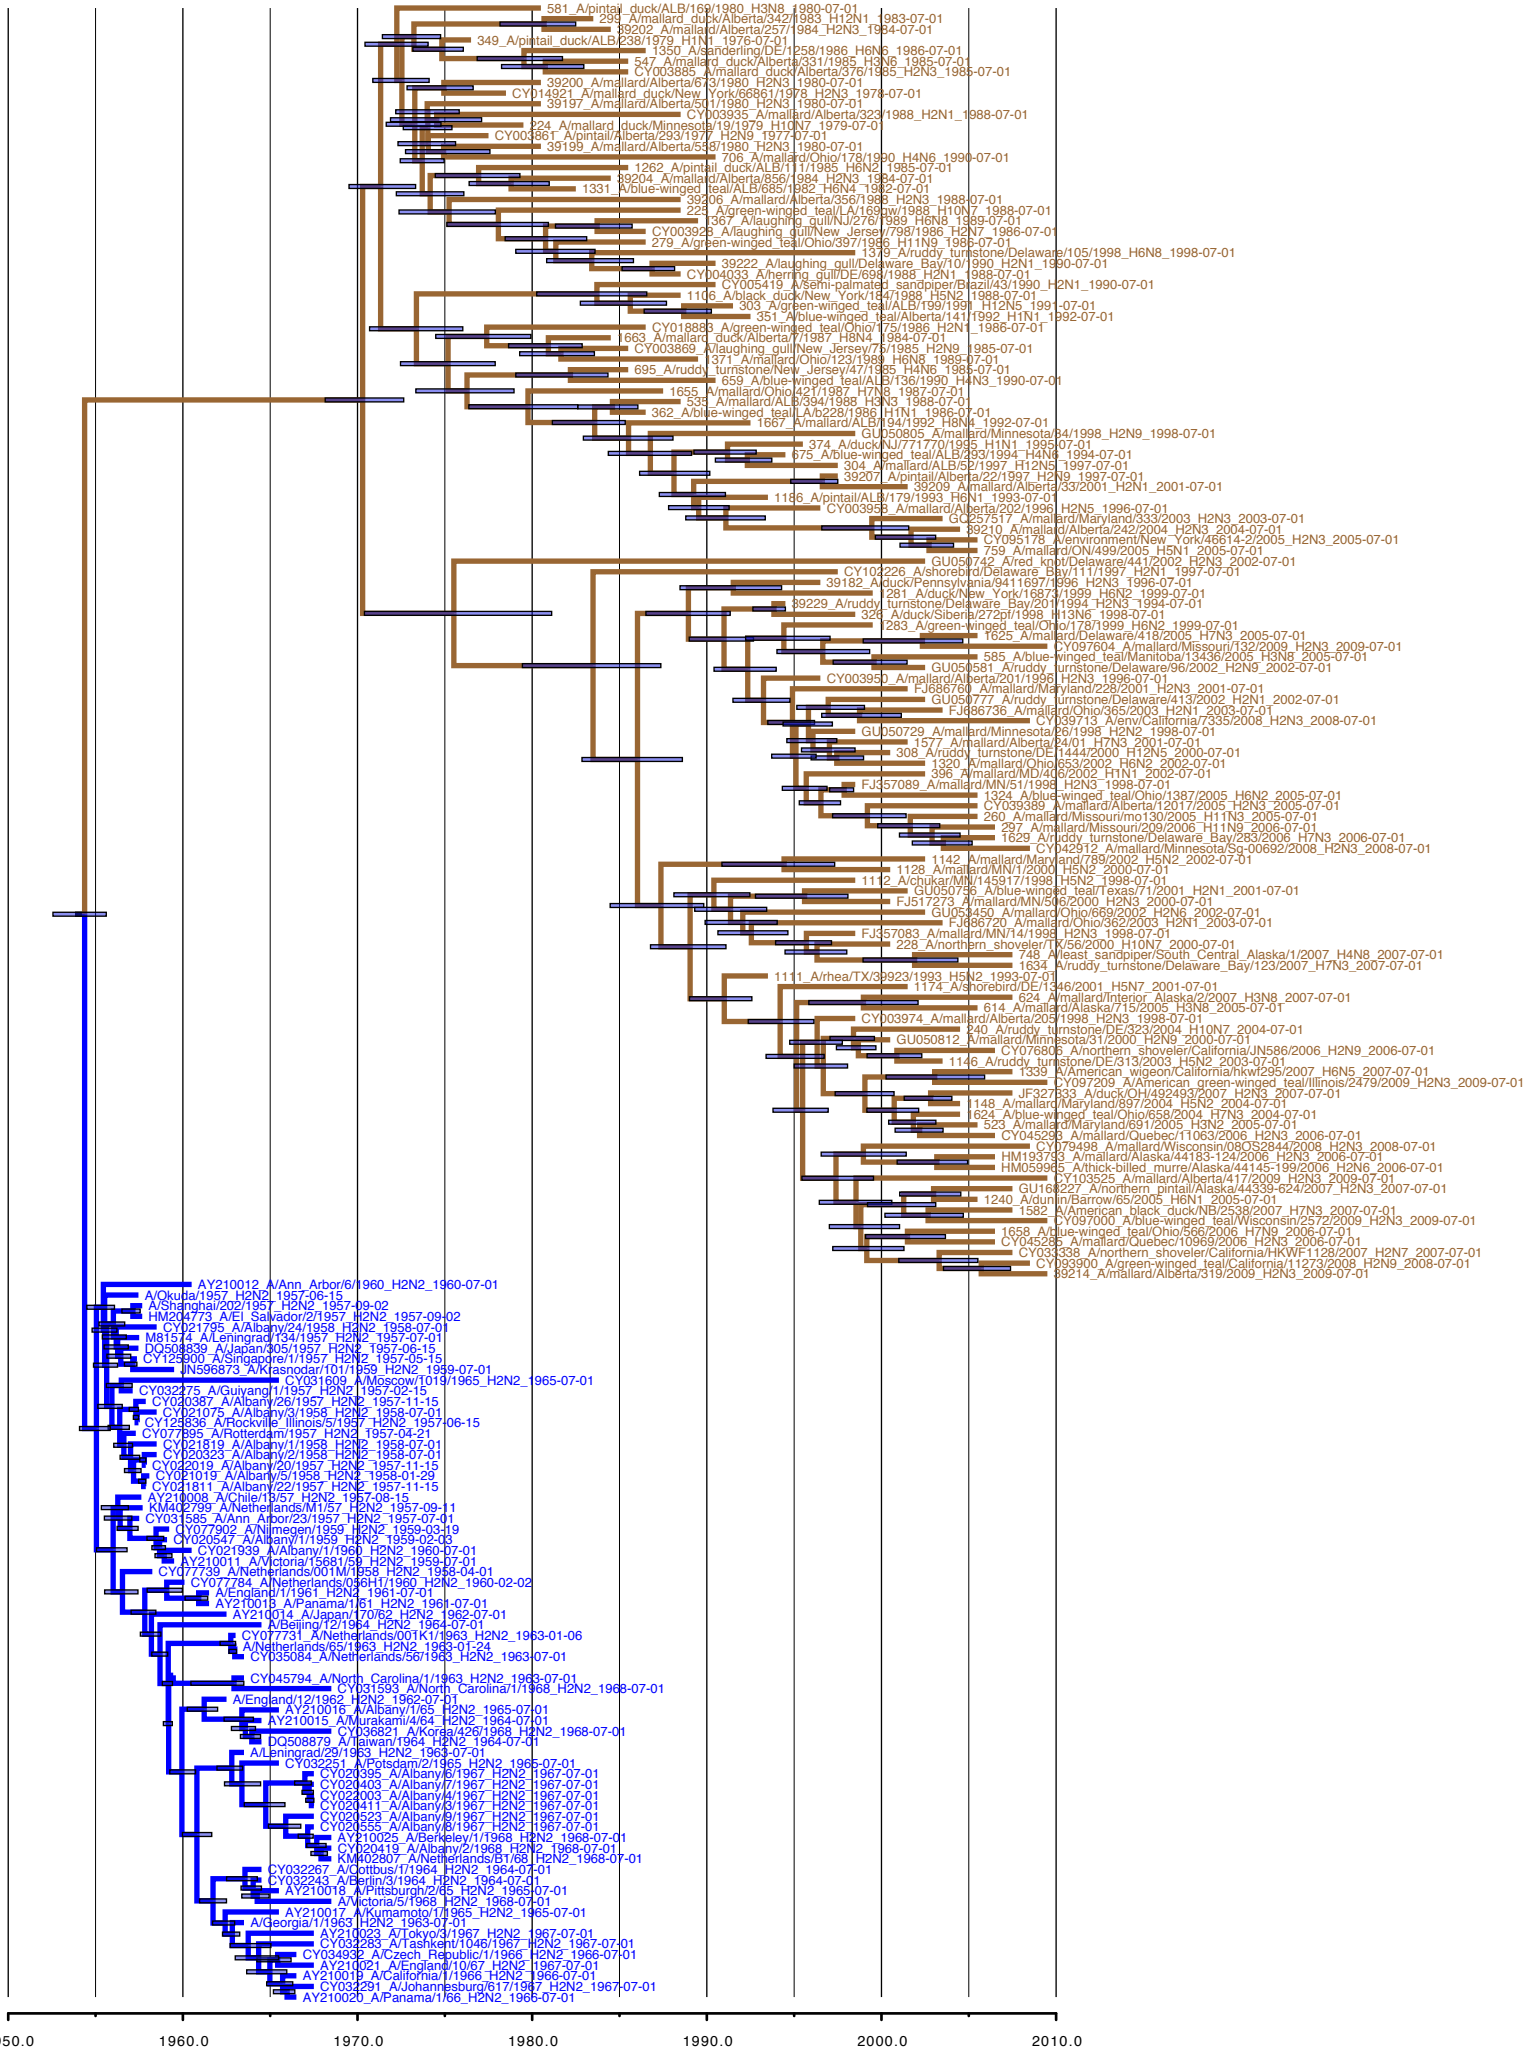

PA (n=101)

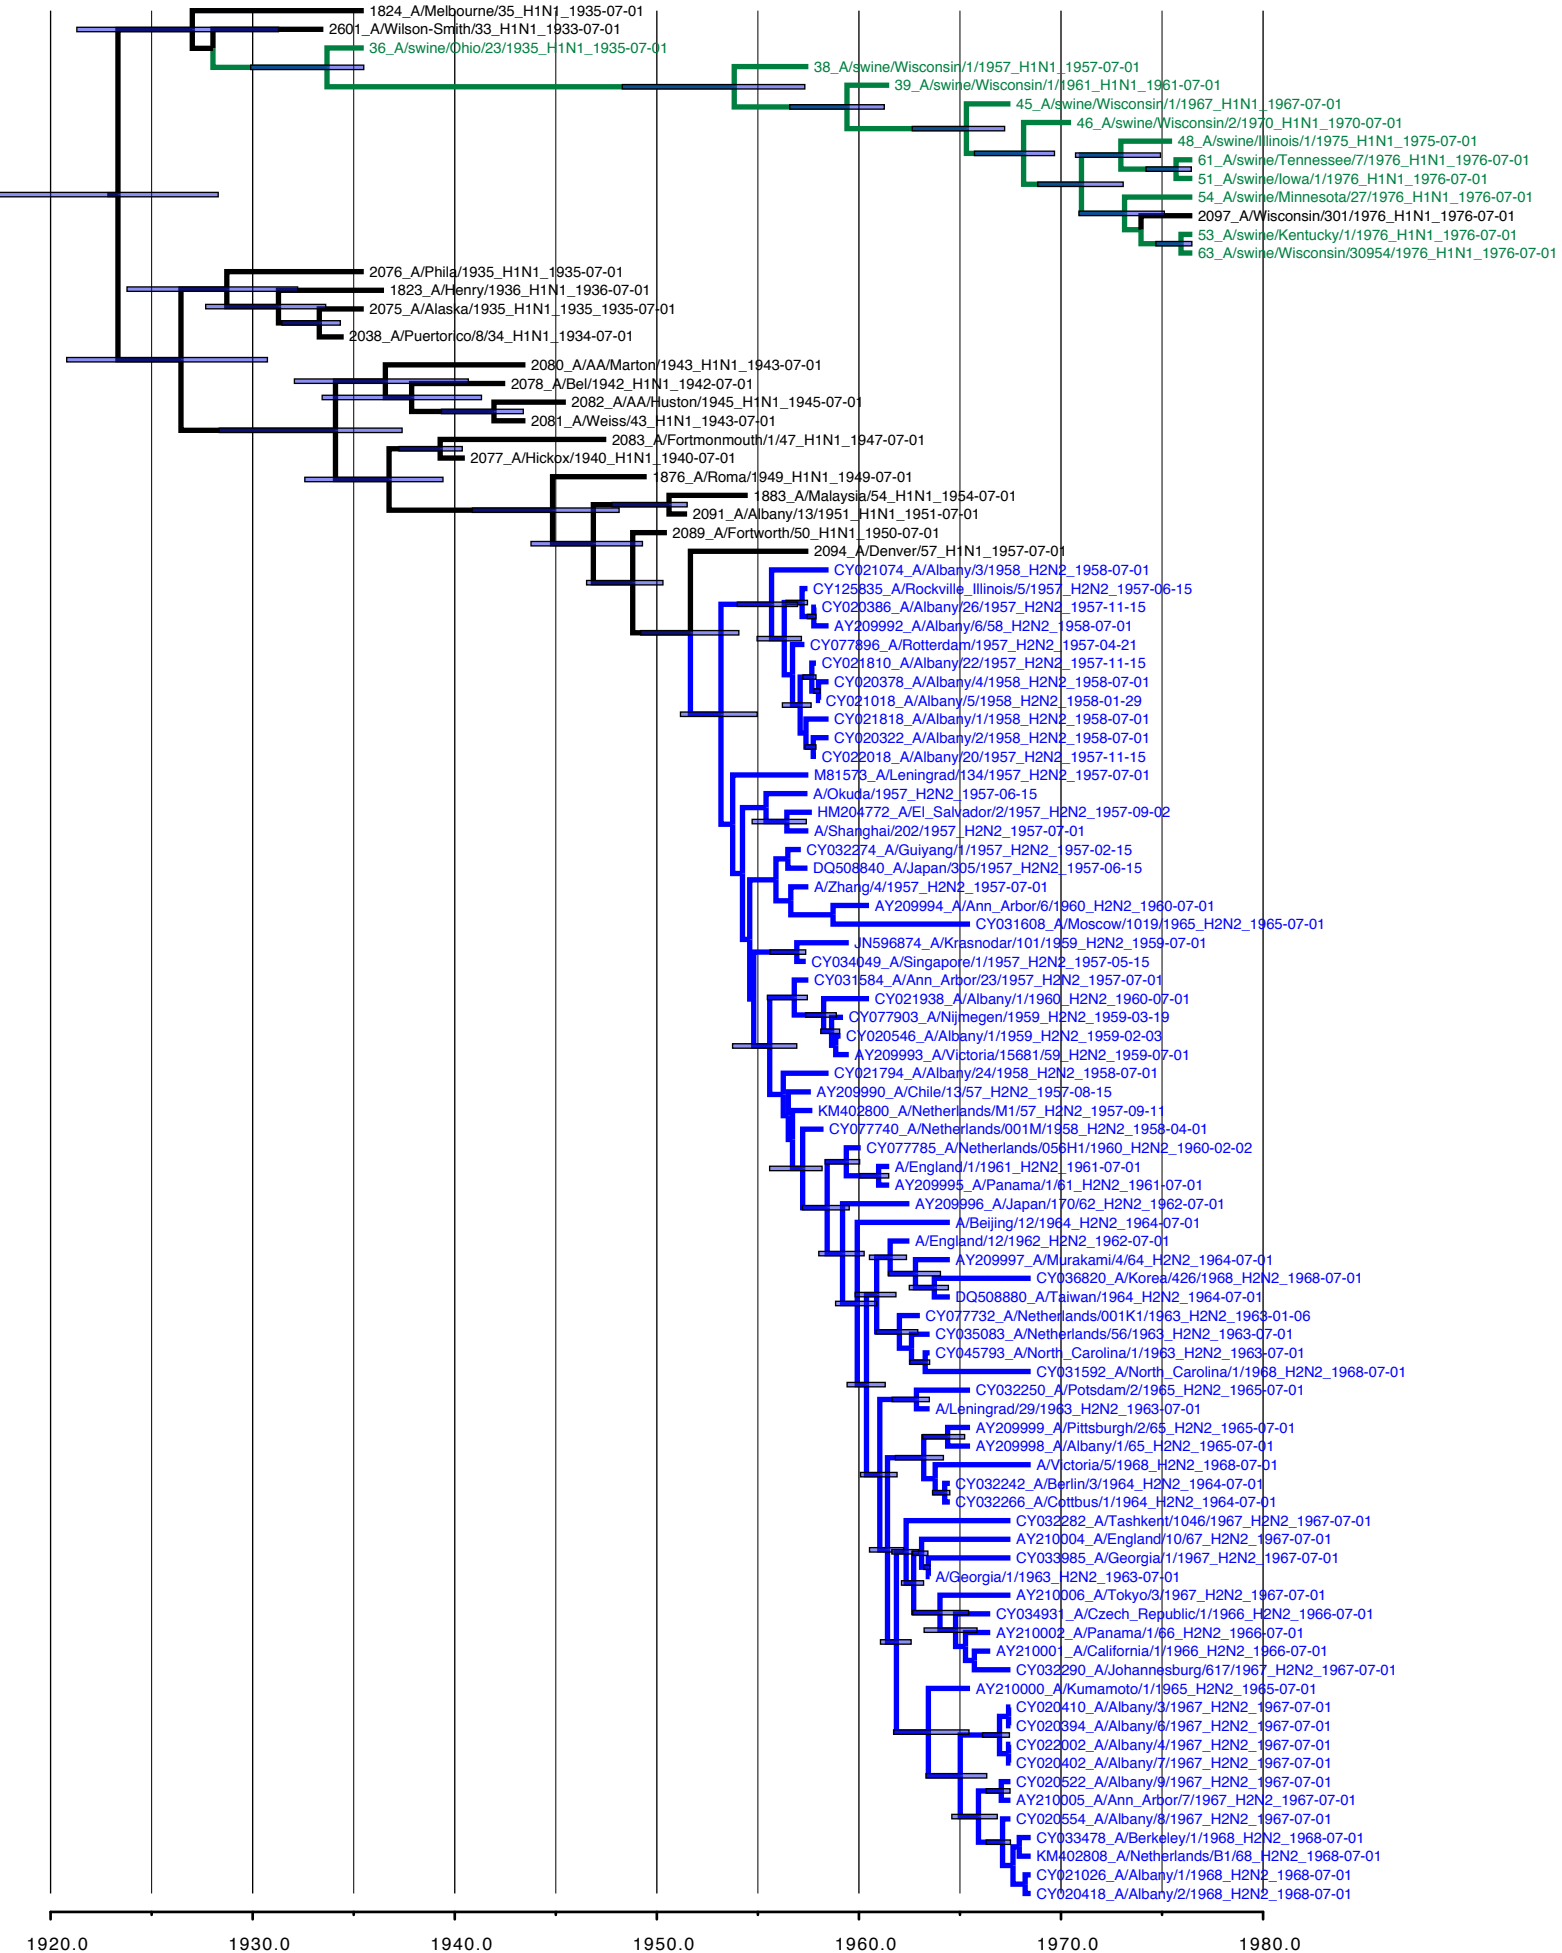

HA (n=194)

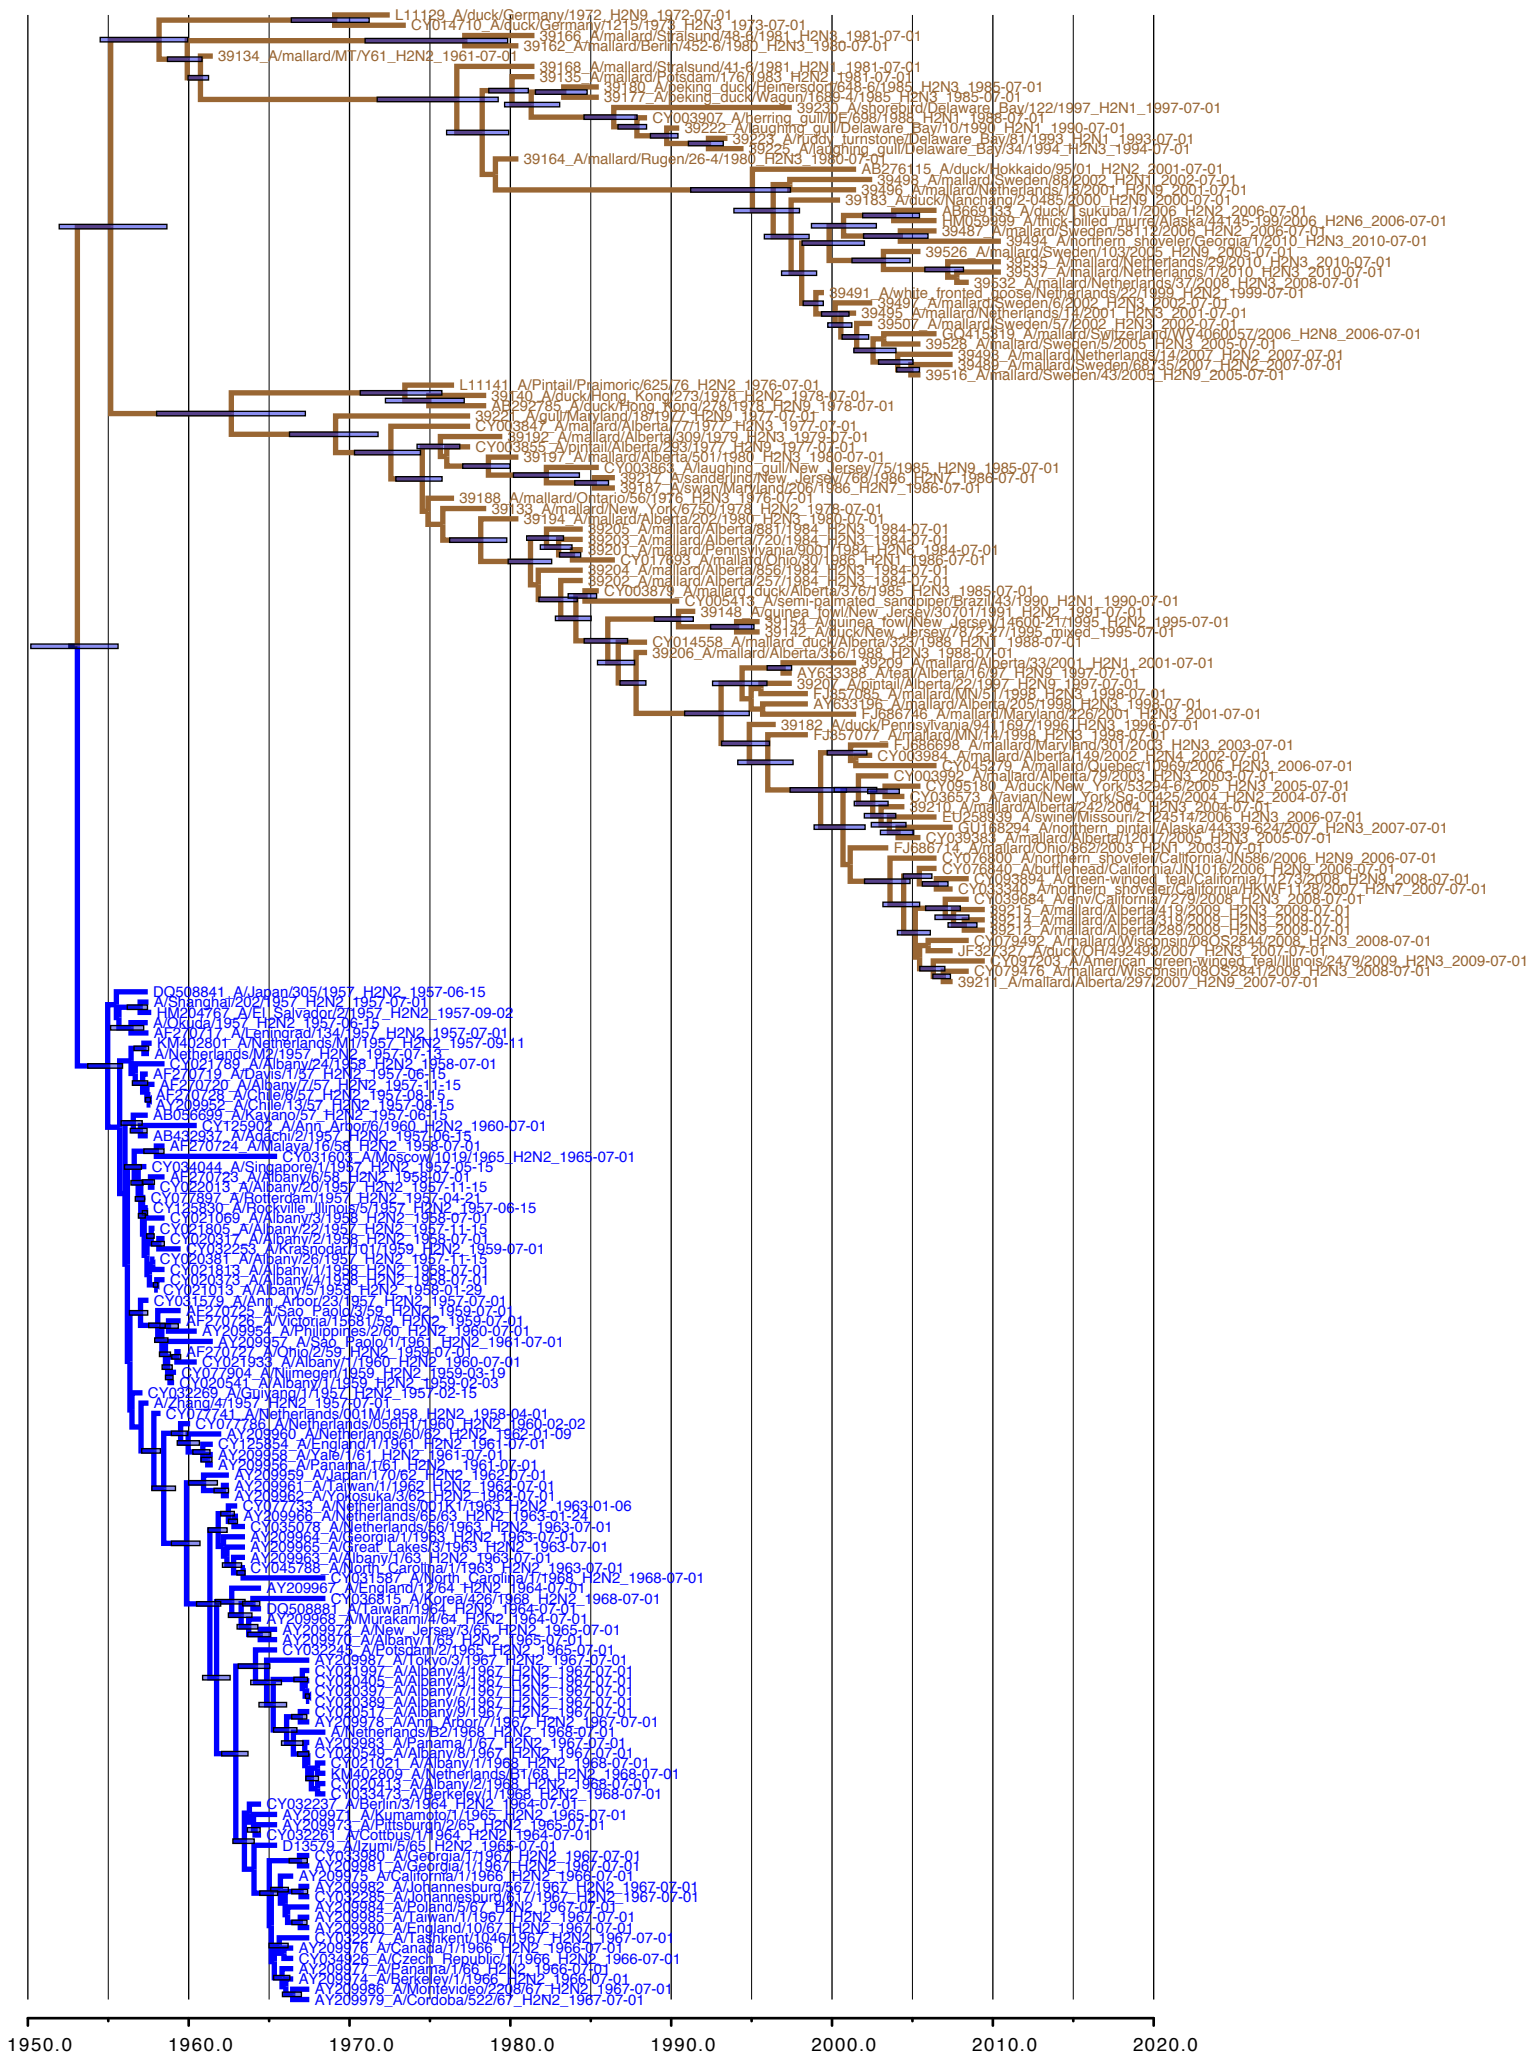

NP (n=106)

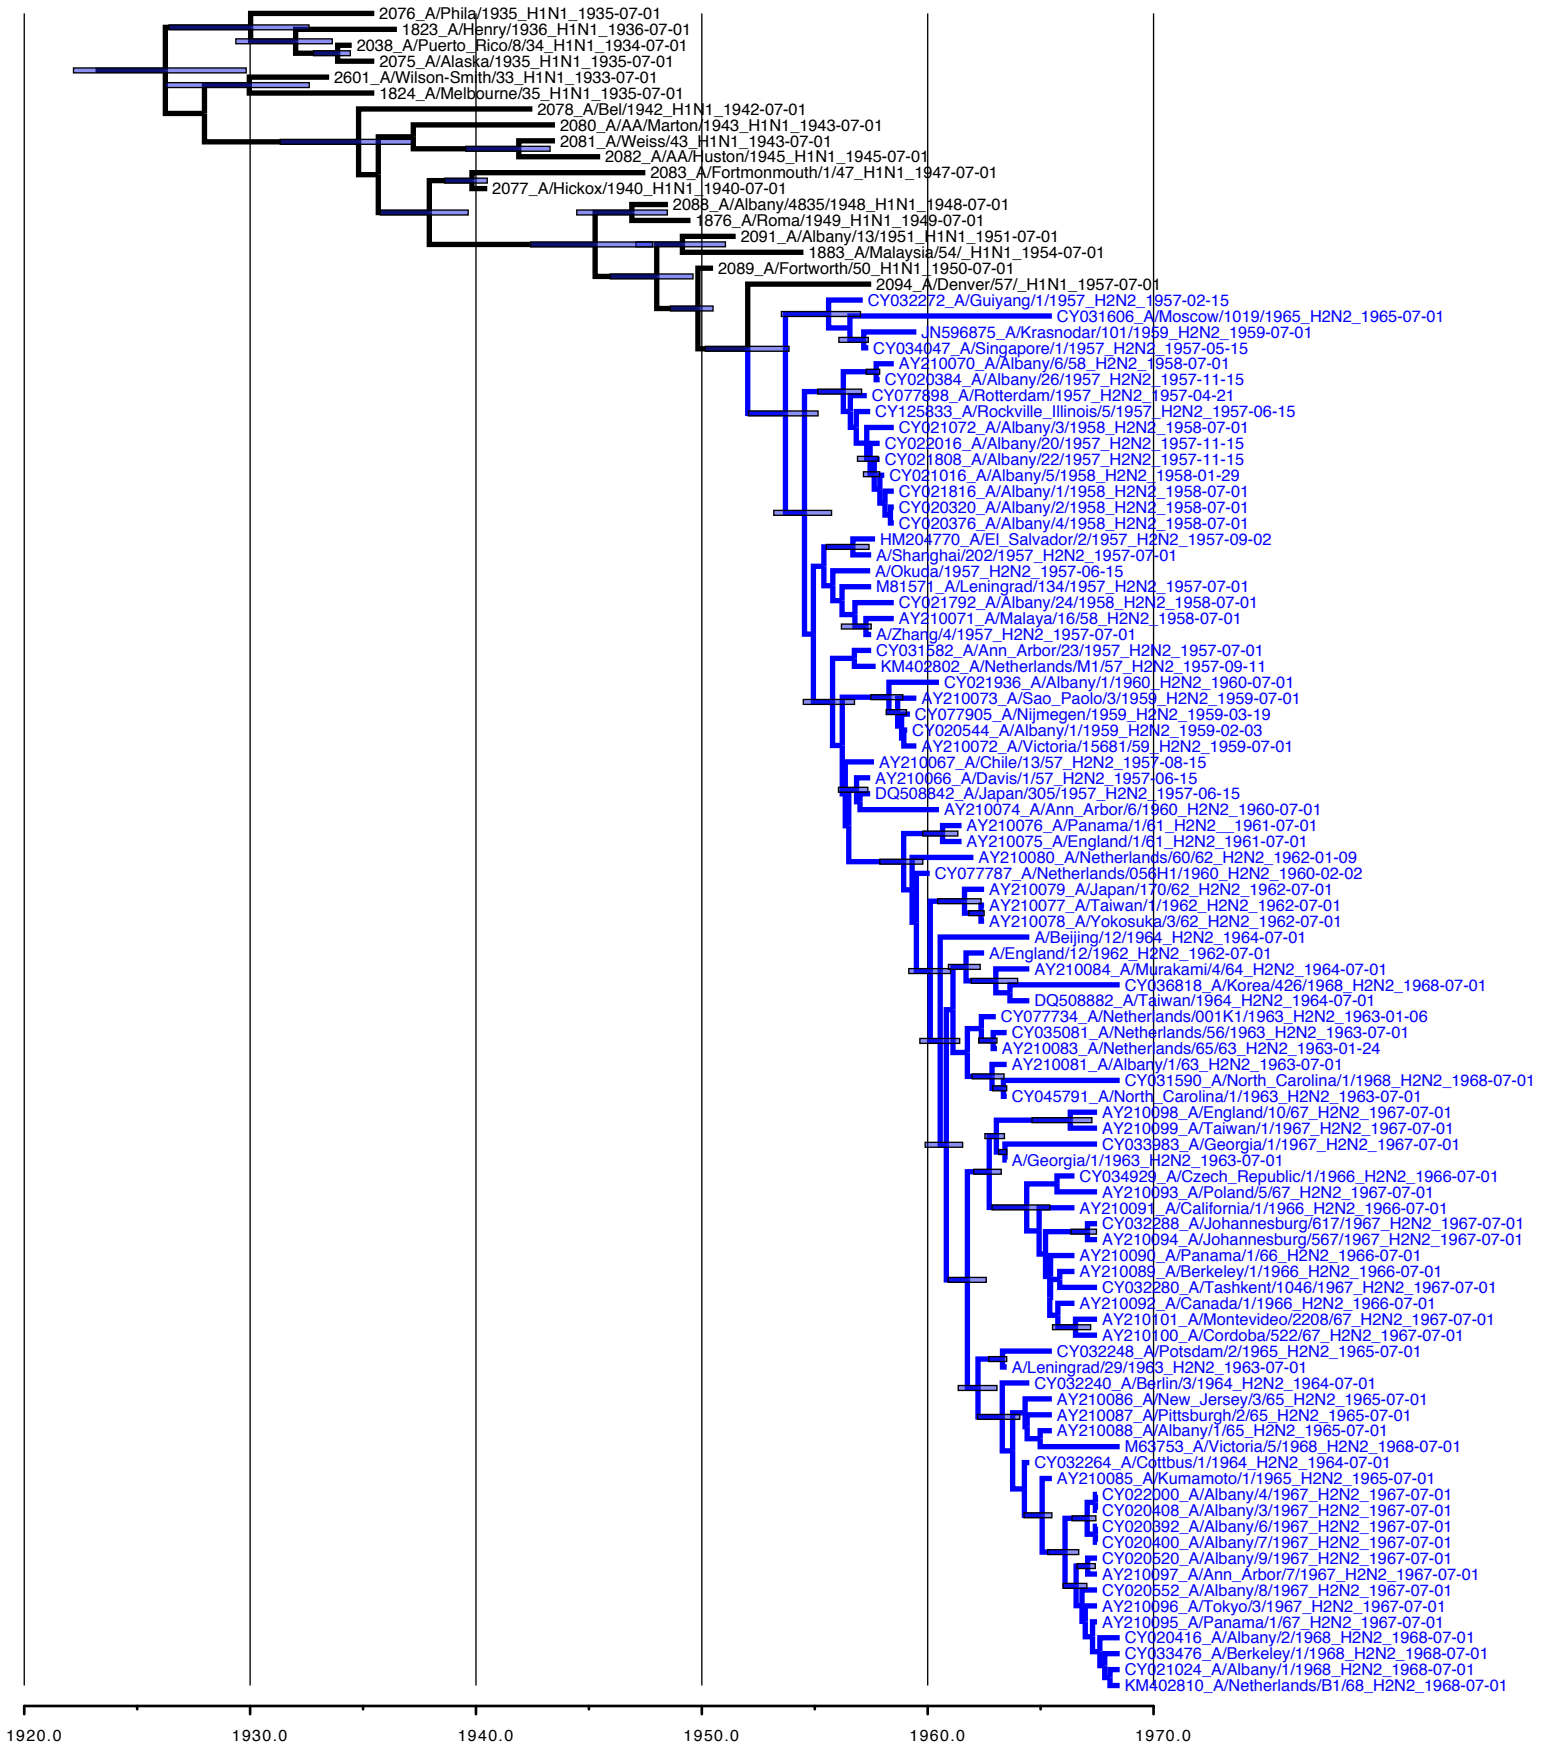

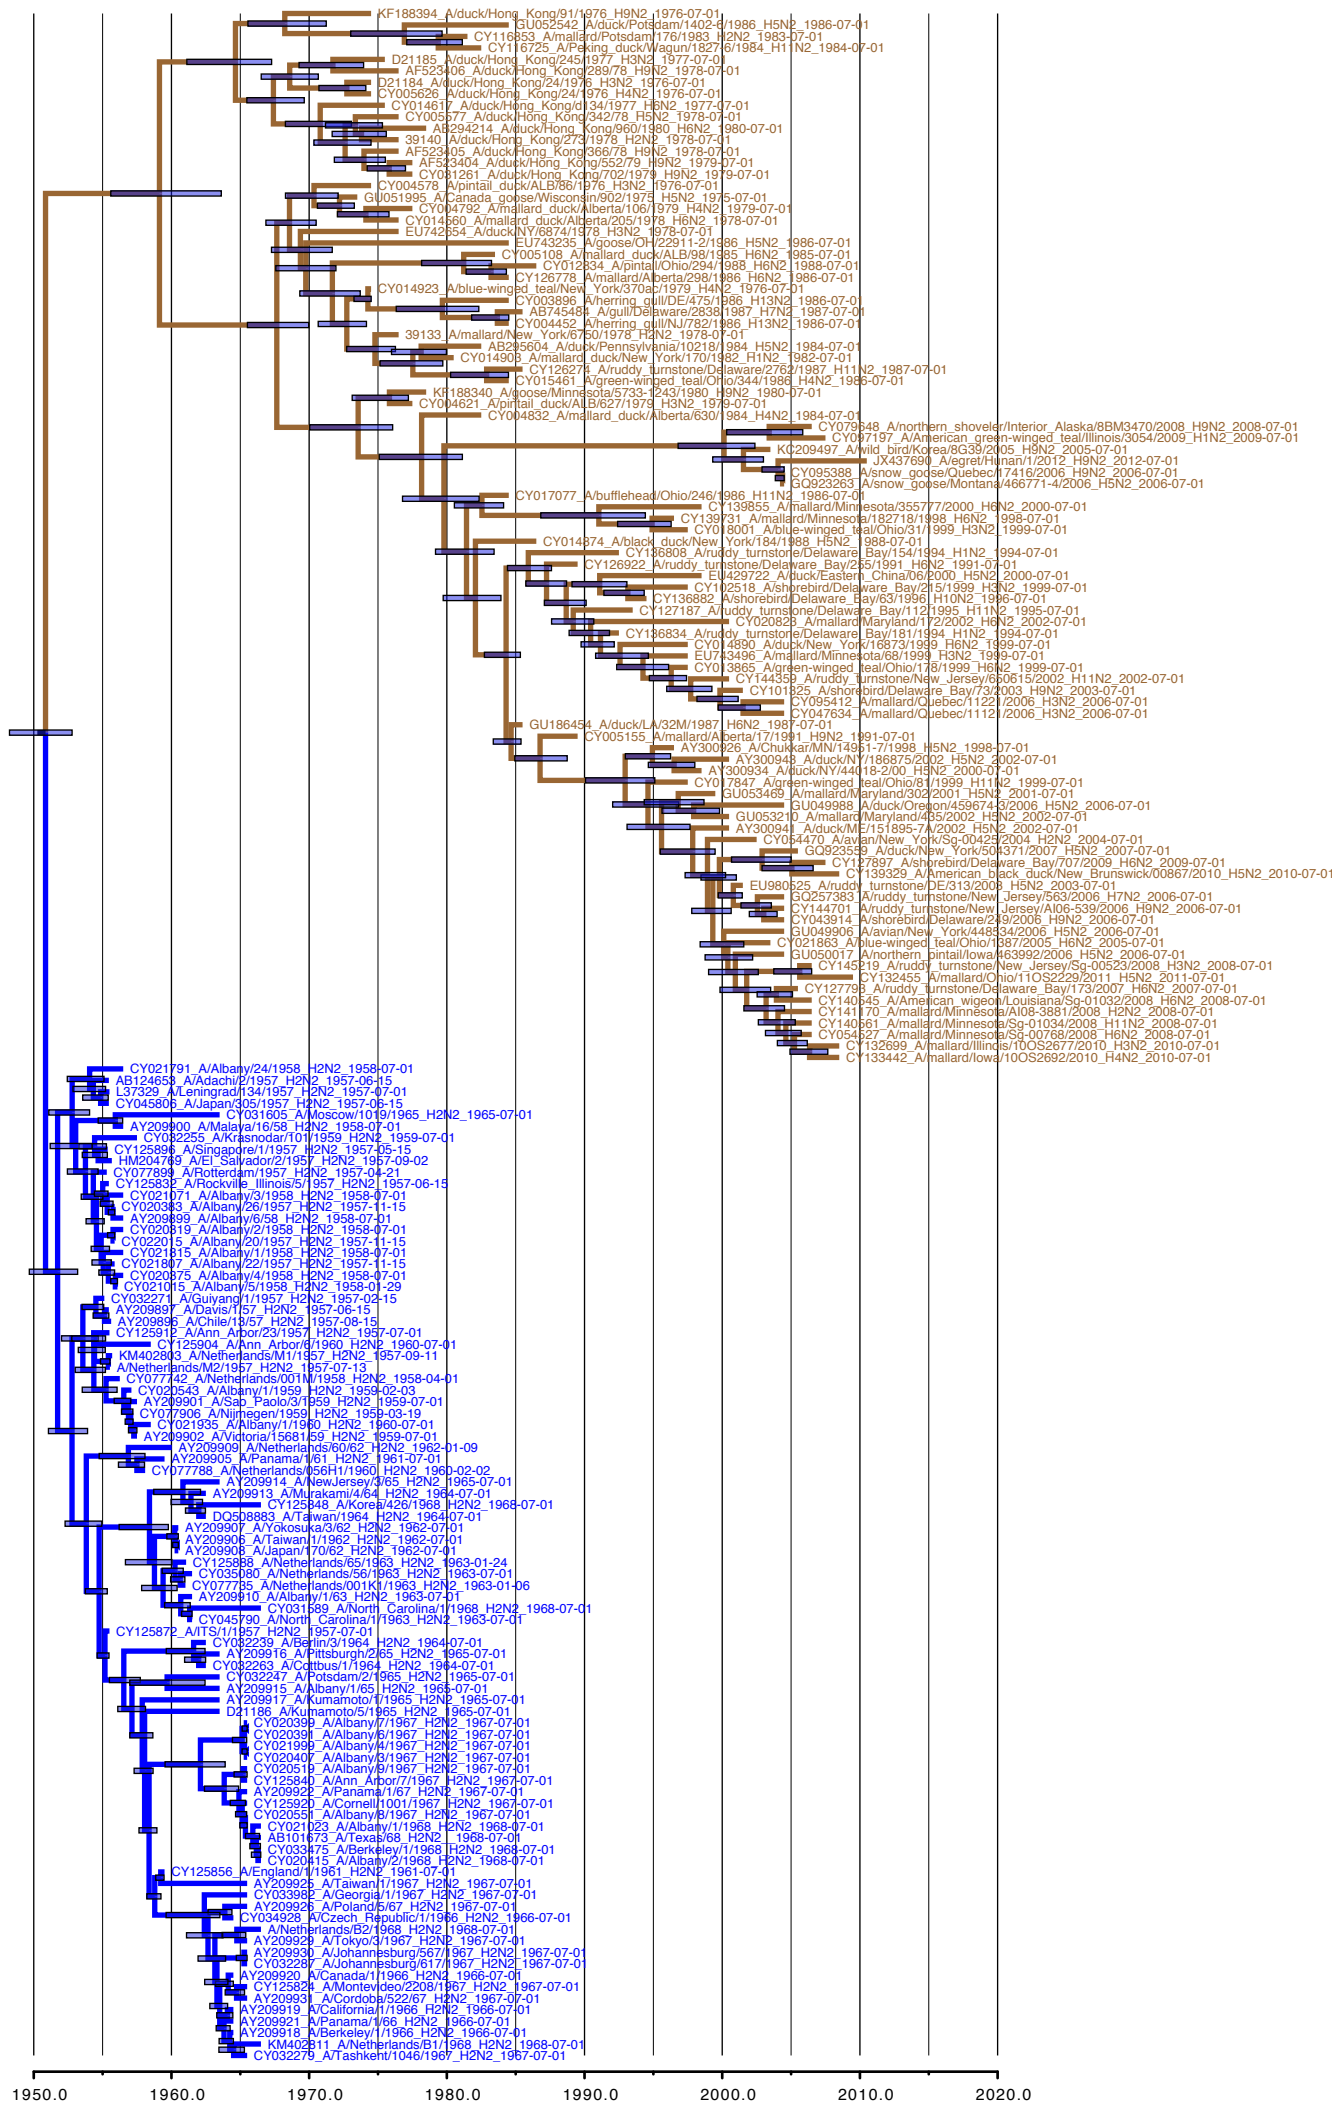

1950.0 1960.0 1970.0 1980.0 1990.0 2000.0 2010.0 2020.0



MP (n=117)

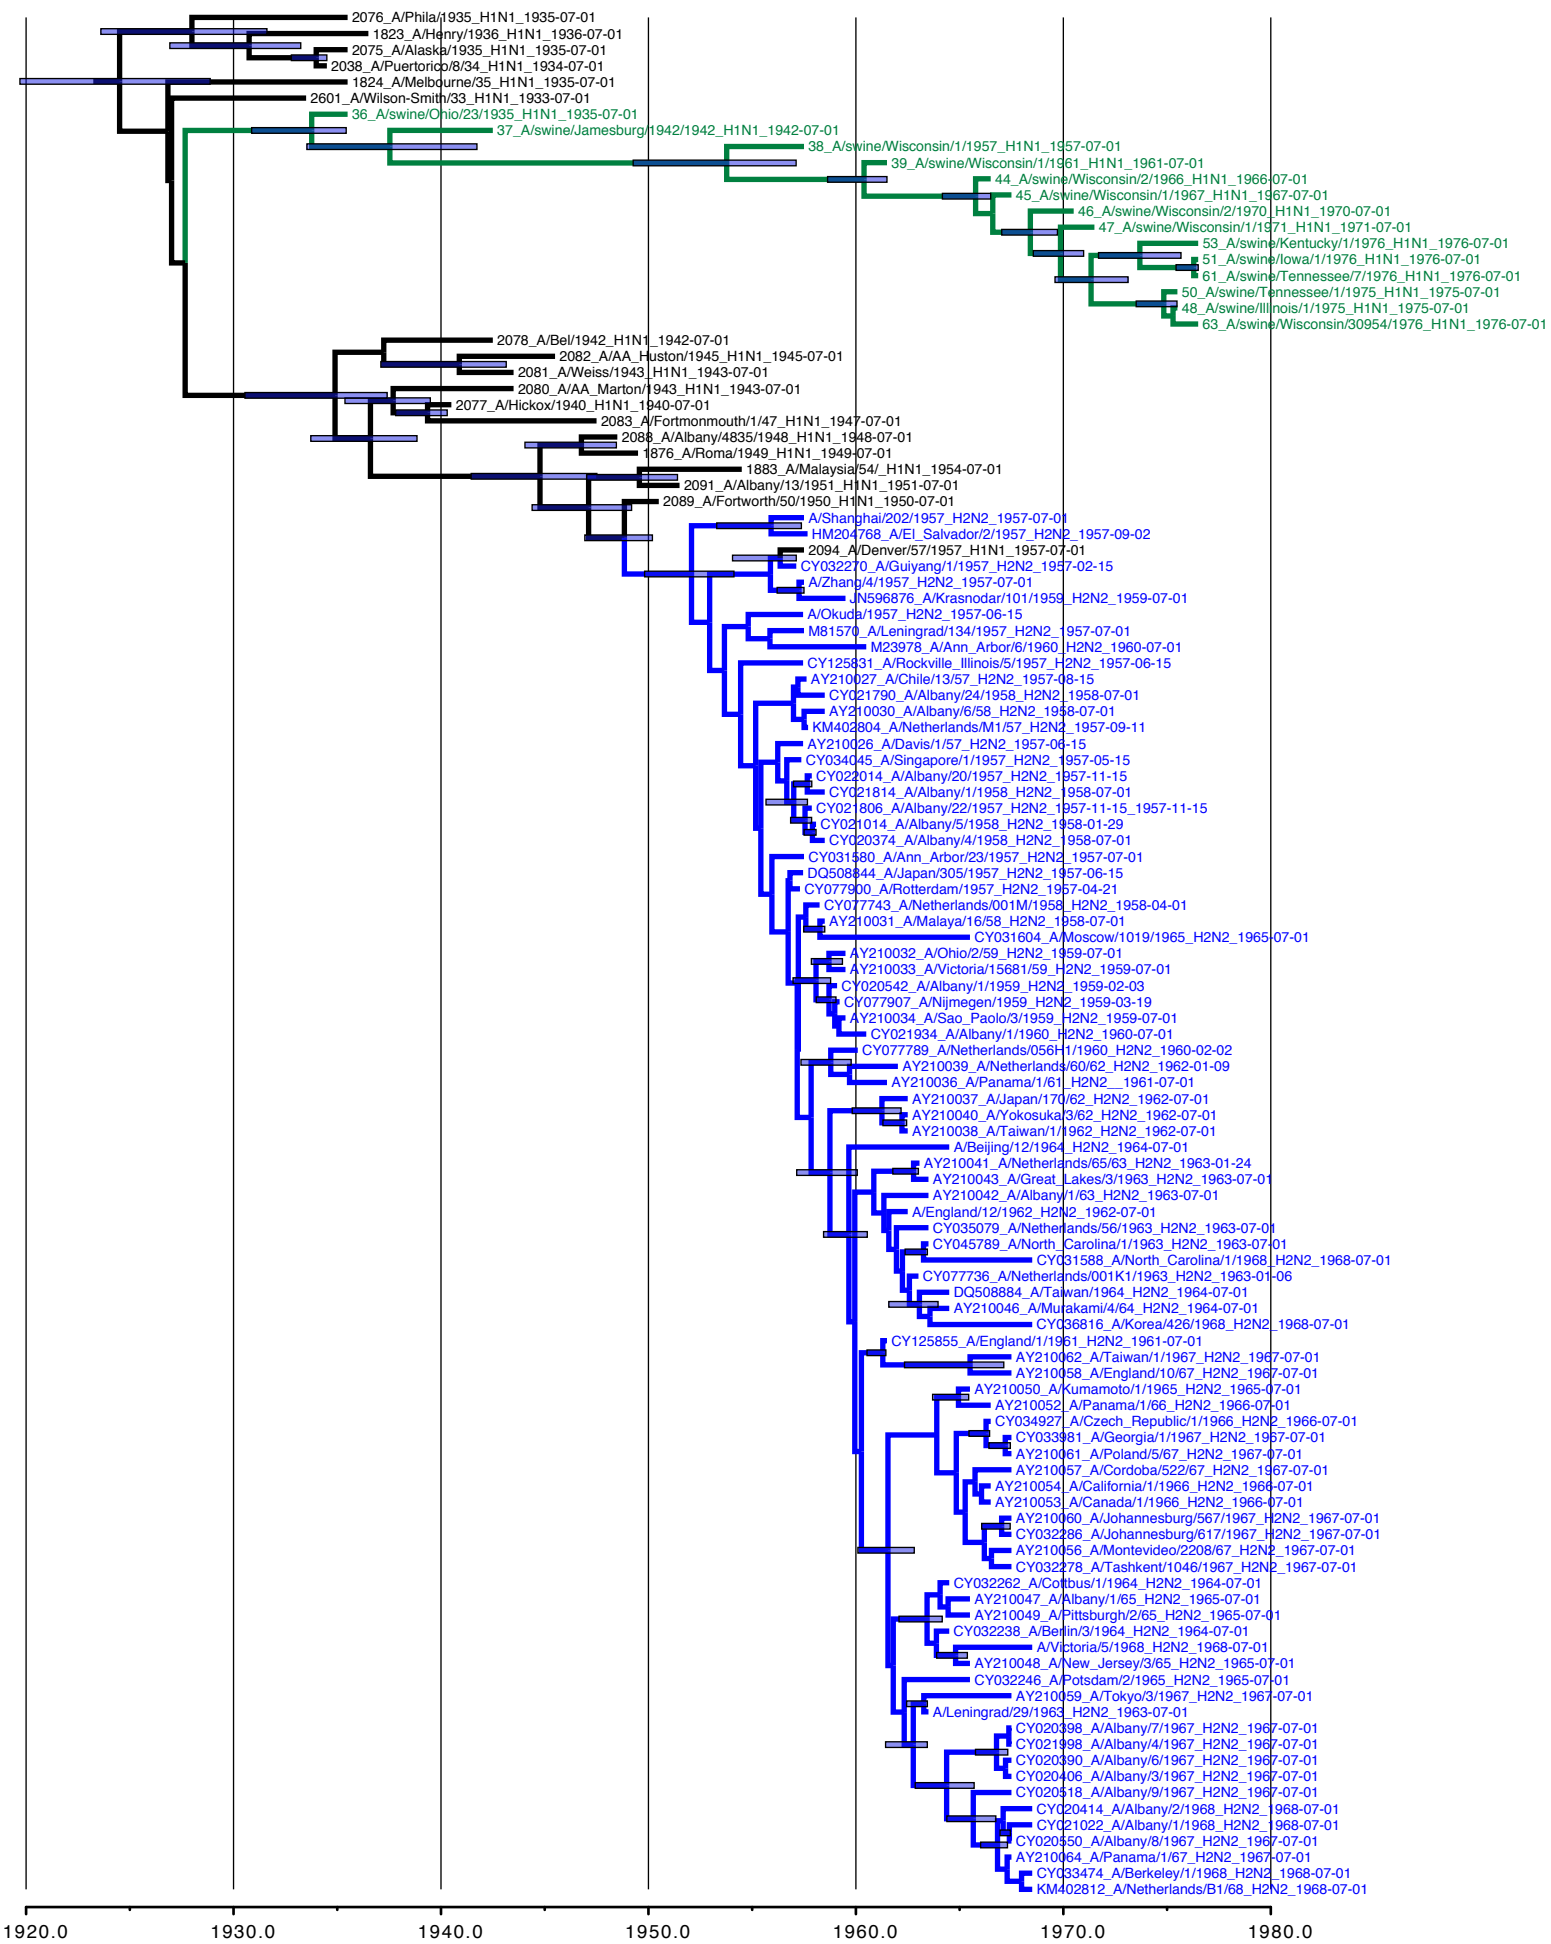

1920.0 1930.0 1940.0 1950.0 1960.0 1970.0 1980.0

NS (n=121)

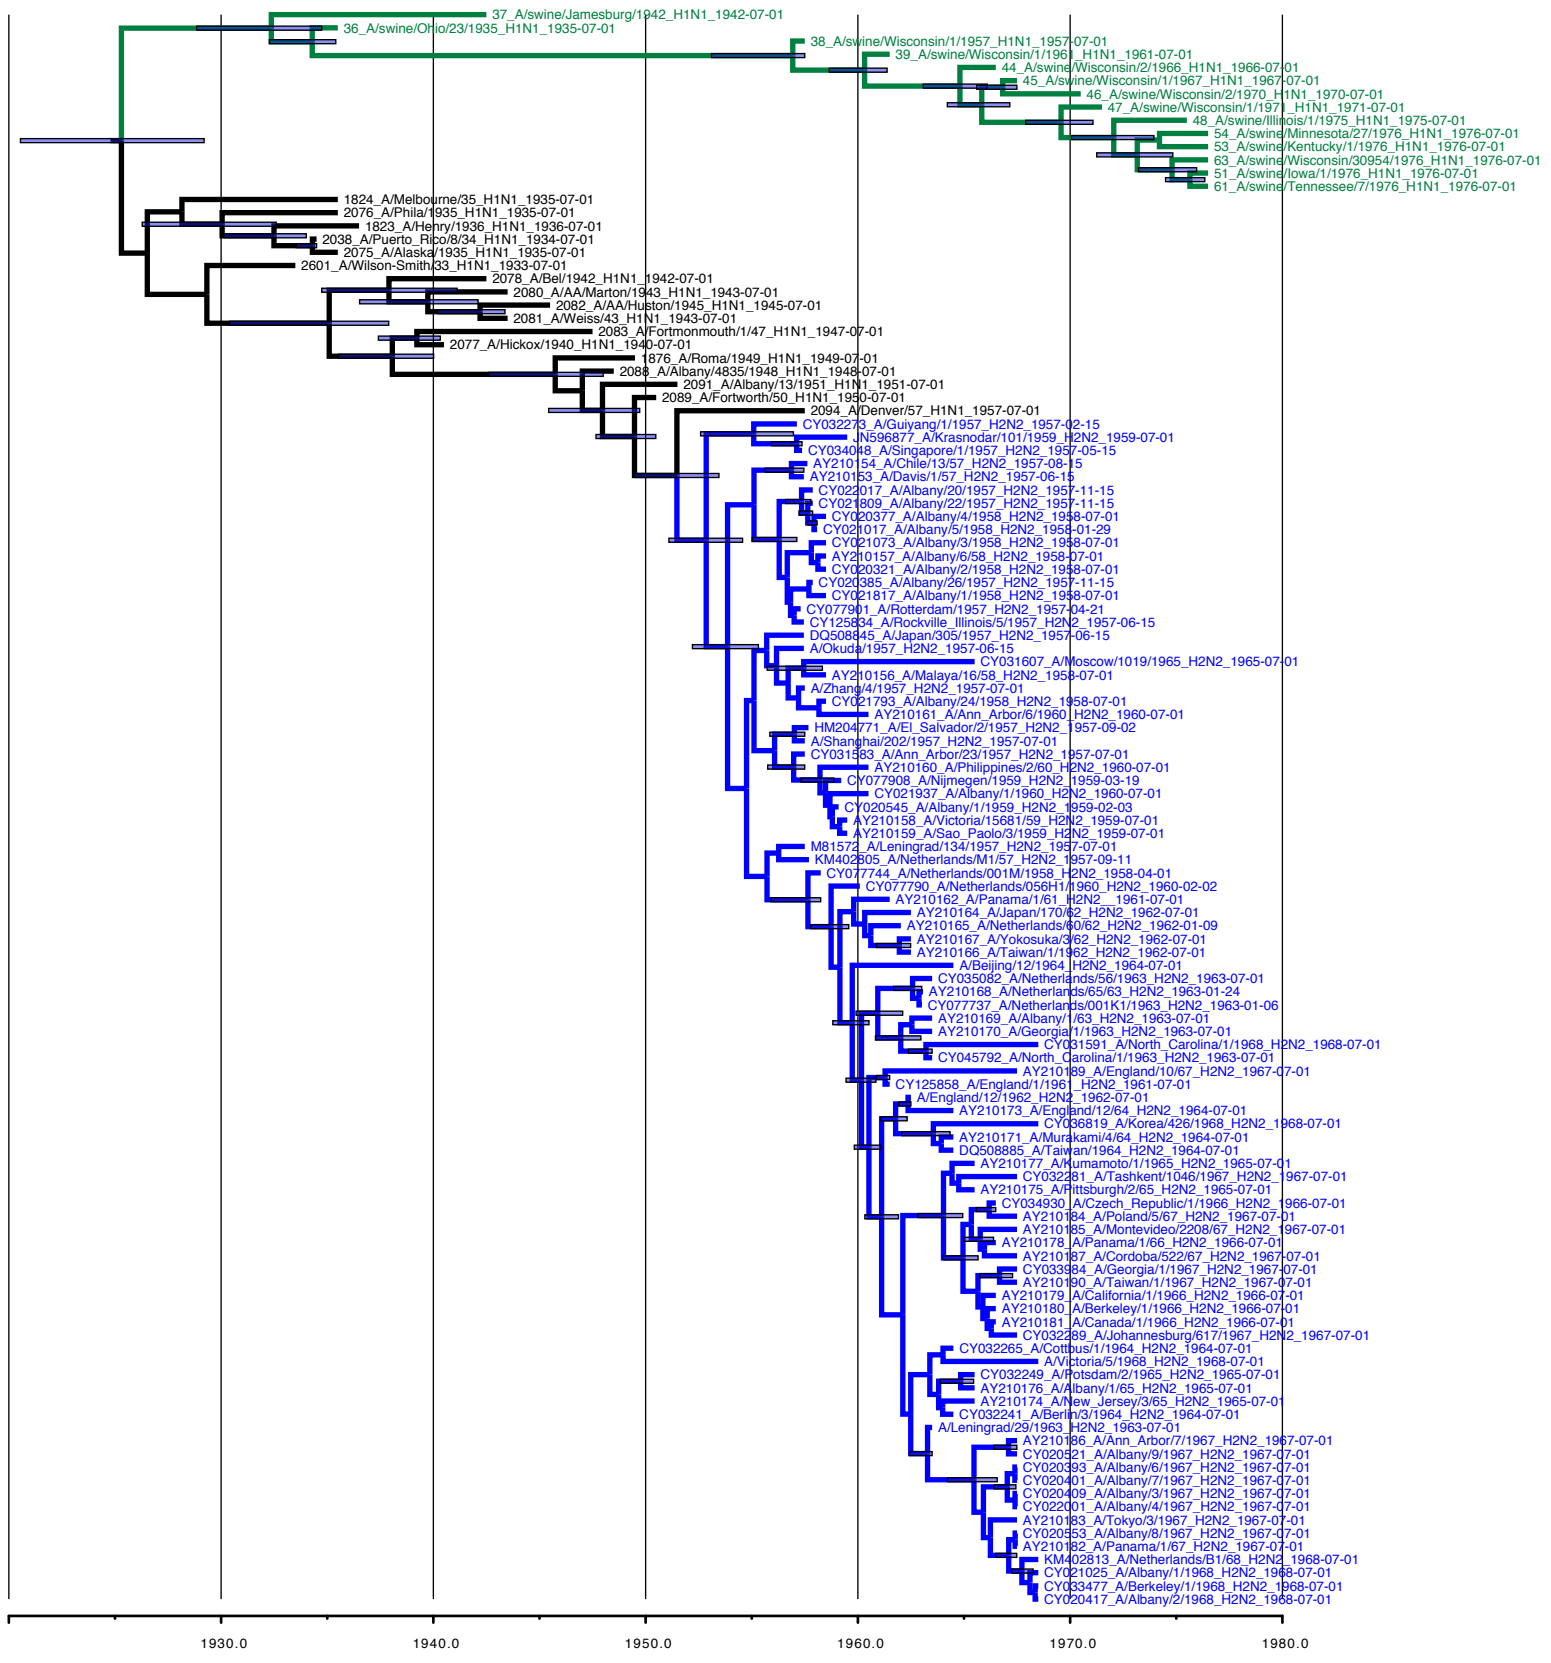

**Figure S3: A.** The positions identified as significant positively selected sites plotted on the crystal structure of the A/Singapore/1/1957(H2N2) virus HA trimer [PDB accession code 2WR7] using MacPyMOL (The PyMOL Molecular Graphics System, Version 1.3, Schrödinger, LLC). The positions that are predicted to be significant in adaptation to human hosts in red. **B.** Observed to Expected CpG ratios in each segment of the human H2N2 isolates (light brown bars) and the respective background/sister clade (dark brown) plotted by year. Error bars represent the standard deviation (SD) by year. Best-fit regression lines (black) shown with 95% confidence interval (grey).

**A**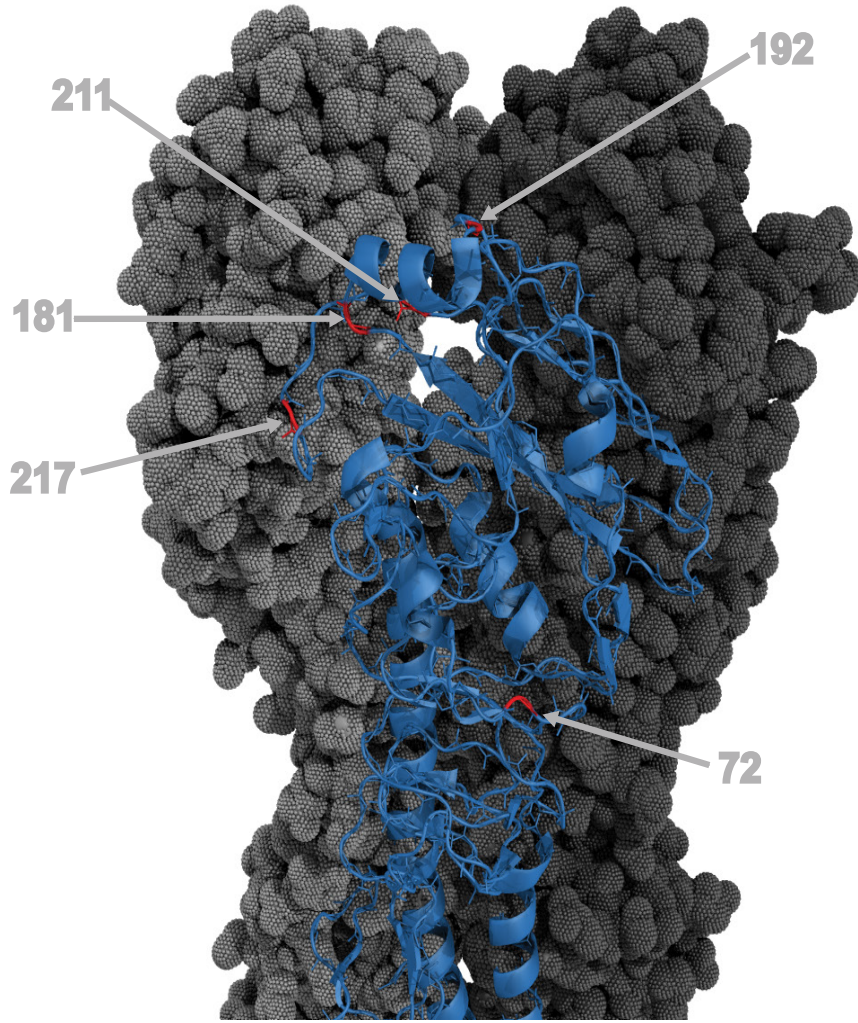**B**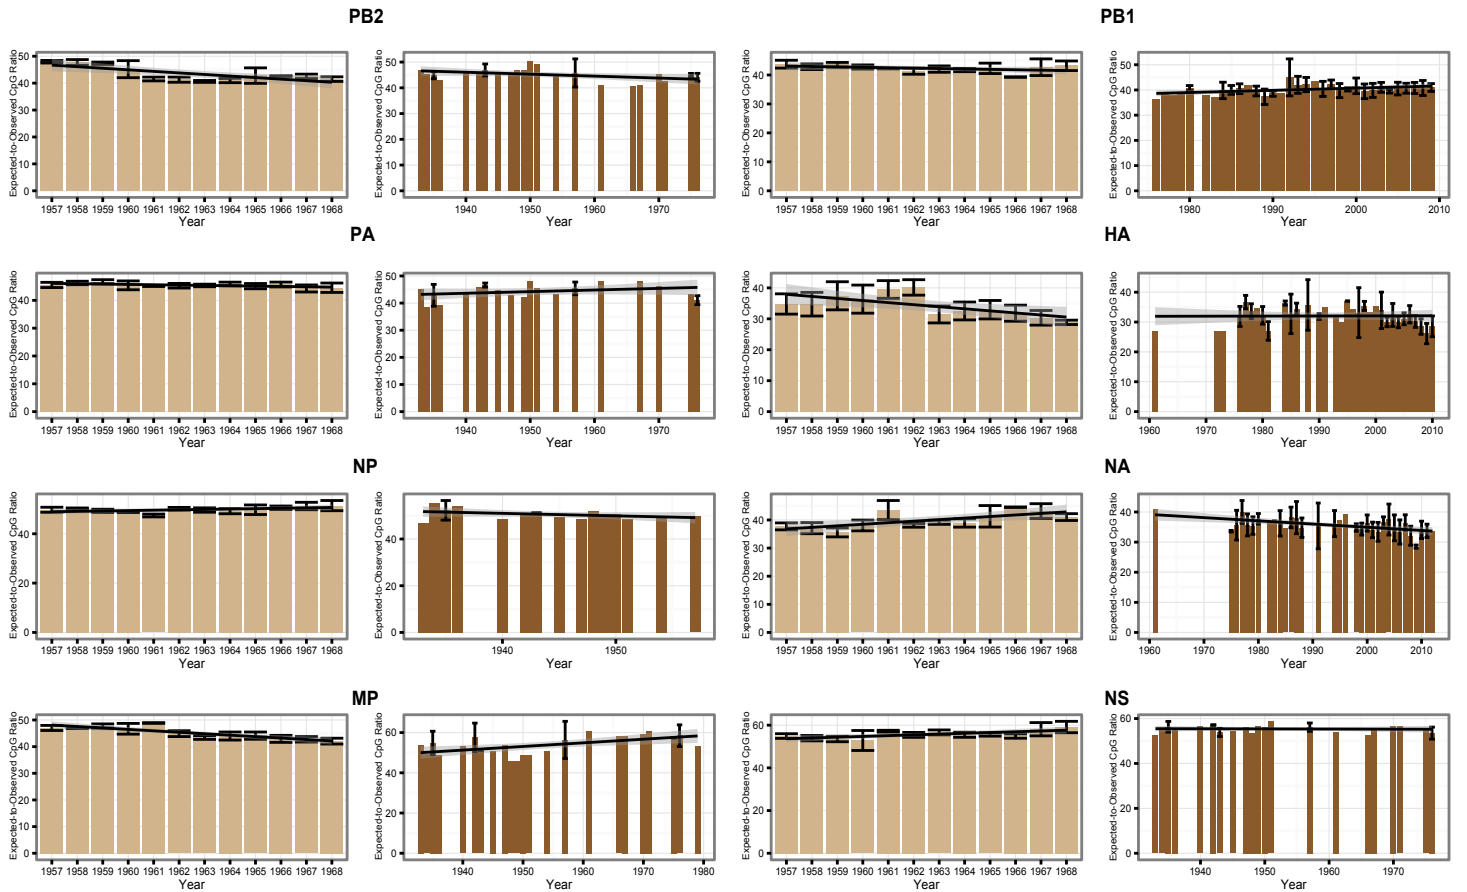

## Supplementary Table 1. List of GenBank accession numbers used in this study

---

|          |          |          |          |          |          |          |          |          |
|----------|----------|----------|----------|----------|----------|----------|----------|----------|
| AB049153 | AB212283 | AB256743 | AB275413 | AB284327 | AB434303 | AB434393 | AB450521 | AB472019 |
| AB049154 | AB212284 | AB256744 | AB275415 | AB284328 | AB434305 | AB434395 | AB450523 | AB472020 |
| AB049155 | AB239300 | AB256745 | AB275615 | AB285091 | AB434307 | AB434396 | AB450524 | AB472052 |
| AB049156 | AB239301 | AB256747 | AB275616 | AB285092 | AB434308 | AB434397 | AB450526 | AB472053 |
| AB049157 | AB239302 | AB256748 | AB275617 | AB285093 | AB434317 | AB434398 | AB450534 | AB472054 |
| AB049158 | AB239303 | AB256749 | AB275619 | AB285095 | AB434318 | AB434399 | AB450536 | AB472055 |
| AB049161 | AB239305 | AB256750 | AB275621 | AB285097 | AB434319 | AB434401 | AB450537 | AB473540 |
| AB049162 | AB239306 | AB261850 | AB275623 | AB285098 | AB434321 | AB434403 | AB450539 | AB473541 |
| AB049163 | AB251944 | AB261851 | AB275624 | AB286877 | AB434323 | AB434404 | AB450540 | AB473542 |
| AB049164 | AB256663 | AB261852 | AB275625 | AB292407 | AB434324 | AB434405 | AB450542 | AB473544 |
| AB049165 | AB256664 | AB261854 | AB275627 | AB292785 | AB434325 | AB434406 | AB450580 | AB473546 |
| AB049166 | AB256665 | AB261855 | AB275629 | AB294214 | AB434326 | AB434407 | AB450582 | AB473547 |
| AB049167 | AB256667 | AB261856 | AB275631 | AB295602 | AB434327 | AB434409 | AB450583 | AB473548 |
| AB049168 | AB256668 | AB261857 | AB275632 | AB295604 | AB434329 | AB434411 | AB450585 | AB473937 |
| AB056699 | AB256669 | AB262460 | AB275649 | AB296073 | AB434331 | AB434412 | AB450586 | AB473938 |
| AB166859 | AB256670 | AB262461 | AB275650 | AB296074 | AB434332 | AB434413 | AB450588 | AB473939 |
| AB166860 | AB256676 | AB262462 | AB275651 | AB298276 | AB434333 | AB434414 | AB450626 | AB473940 |
| AB166861 | AB256679 | AB262464 | AB275652 | AB298281 | AB434334 | AB434415 | AB450628 | AB473941 |
| AB166863 | AB256680 | AB262465 | AB275653 | AB302790 | AB434335 | AB434417 | AB450629 | AB473942 |
| AB166865 | AB256681 | AB262466 | AB275654 | AB304144 | AB434337 | AB434419 | AB450631 | AB478620 |
| AB166866 | AB256683 | AB262467 | AB275655 | AB304145 | AB434339 | AB434420 | AB450632 | AB485601 |
| AB188813 | AB256684 | AB266379 | AB275656 | AB304146 | AB434340 | AB436547 | AB450634 | AB490828 |
| AB188814 | AB256685 | AB266381 | AB275657 | AB304148 | AB434341 | AB436548 | AB450642 | AB507266 |
| AB188815 | AB256686 | AB266383 | AB275658 | AB304150 | AB434342 | AB436549 | AB450644 | AB516415 |
| AB188817 | AB256692 | AB266385 | AB275659 | AB304151 | AB434343 | AB436551 | AB450645 | AB516417 |
| AB188819 | AB256700 | AB266386 | AB275660 | AB428701 | AB434345 | AB436553 | AB450647 | AB545592 |
| AB188820 | AB256708 | AB268552 | AB275661 | AB428726 | AB434347 | AB436554 | AB450648 | AB545594 |
| AB189050 | AB256711 | AB268553 | AB275662 | AB428727 | AB434348 | AB436951 | AB450650 | AB545598 |
| AB189051 | AB256712 | AB268554 | AB275663 | AB432937 | AB434373 | AB441171 | AB458244 | AB546164 |
| AB189052 | AB256713 | AB268555 | AB275858 | AB434285 | AB434374 | AB441173 | AB458245 | AB546169 |
| AB189054 | AB256715 | AB268556 | AB275860 | AB434286 | AB434375 | AB441174 | AB458246 | AB546174 |
| AB189056 | AB256716 | AB274963 | AB275862 | AB434287 | AB434377 | AB441175 | AB458248 | AB557632 |
| AB189057 | AB256717 | AB274964 | AB275864 | AB434289 | AB434379 | AB441176 | AB458250 | AB569481 |
| AB189058 | AB256718 | AB274965 | AB275865 | AB434291 | AB434380 | AB441177 | AB458251 | AB569489 |
| AB189059 | AB256724 | AB275284 | AB276112 | AB434292 | AB434381 | AB450444 | AB462292 | AB569529 |
| AB189060 | AB256732 | AB275286 | AB276115 | AB434293 | AB434382 | AB450502 | AB462293 | AB569545 |
| AB189062 | AB256735 | AB275287 | AB276116 | AB434294 | AB434383 | AB450504 | AB462294 | AB571530 |
| AB189064 | AB256736 | AB275403 | AB277755 | AB434295 | AB434385 | AB450505 | AB462296 | AB572587 |
| AB189065 | AB256737 | AB275405 | AB277757 | AB434297 | AB434387 | AB450507 | AB462298 | AB586821 |
| AB212277 | AB256739 | AB275407 | AB284321 | AB434299 | AB434388 | AB450508 | AB462299 | AB586853 |
| AB212278 | AB256740 | AB275409 | AB284322 | AB434300 | AB434389 | AB450510 | AB472016 | AB593441 |
| AB212279 | AB256741 | AB275410 | AB284323 | AB434301 | AB434390 | AB450518 | AB472017 | AB618153 |
| AB212281 | AB256742 | AB275411 | AB284325 | AB434302 | AB434391 | AB450520 | AB472018 | AB618161 |

|          |          |          |          |          |          |          |          |          |
|----------|----------|----------|----------|----------|----------|----------|----------|----------|
| AB618169 | AB769246 | AF144301 | AF270725 | AF508595 | AF536712 | AX350200 | AY180818 | AY209968 |
| AB618564 | AB775616 | AF144302 | AF270726 | AF508605 | AF536713 | AX350202 | AY180819 | AY209969 |
| AB618572 | AB775801 | AF144303 | AF270727 | AF508606 | AF536714 | AX399724 | AY180820 | AY209970 |
| AB618580 | AB779676 | AF144306 | AF270728 | AF508615 | AF536715 | AX399725 | AY180821 | AY209971 |
| AB618588 | AB781006 | AF144307 | AF389115 | AF508616 | AF536716 | AX399726 | AY180822 | AY209972 |
| AB618596 | AB781013 | AF156391 | AF389116 | AF508627 | AF536717 | AX399727 | AY180823 | AY209973 |
| AB636535 | AB781117 | AF156392 | AF389117 | AF508628 | AF536718 | AX399728 | AY180824 | AY209974 |
| AB638317 | AB781297 | AF156393 | AF389119 | AF508637 | AJ243994 | AX399730 | AY180825 | AY209975 |
| AB638325 | AB781304 | AF156394 | AF389121 | AF508638 | AJ291393 | AX399731 | AY180826 | AY209976 |
| AB638608 | AB781671 | AF156395 | AF389122 | AF508649 | AJ458265 | AY038015 | AY180827 | AY209977 |
| AB638727 | AB807874 | AF156396 | AF457677 | AF508650 | AJ458268 | AY043020 | AY180828 | AY209978 |
| AB638735 | AB812567 | AF156397 | AF457680 | AF508659 | AJ458298 | AY180476 | AY180829 | AY209979 |
| AB638743 | AB812745 | AF156398 | AF457686 | AF508660 | AJ458301 | AY180503 | AY209934 | AY209980 |
| AB638751 | AB818390 | AF156399 | AF457694 | AF508671 | AJ519458 | AY180510 | AY209935 | AY209981 |
| AB638759 | AB818391 | AF156400 | AF457702 | AF508672 | AJ519460 | AY180511 | AY209936 | AY209982 |
| AB639028 | AB818392 | AF156401 | AF457711 | AF508681 | AJ574900 | AY180512 | AY209937 | AY209983 |
| AB669133 | AB830630 | AF203786 | AF474039 | AF508682 | AJ574901 | AY180514 | AY209938 | AY209984 |
| AB701299 | AB836741 | AF222652 | AF474040 | AF508693 | AJ574902 | AY180557 | AY209939 | AY209985 |
| AB716677 | AB841274 | AF222653 | AF474041 | AF508694 | AJ574903 | AY180558 | AY209940 | AY209986 |
| AB716685 | AB849915 | AF222654 | AF474042 | AF508702 | AJ574904 | AY180568 | AY209941 | AY209987 |
| AB719868 | AF079571 | AF222655 | AF474043 | AF508703 | AJ574905 | AY180571 | AY209942 | AY209988 |
| AB719876 | AF098555 | AF222656 | AF474044 | AF508714 | AJ574906 | AY180573 | AY209943 | AY209989 |
| AB719884 | AF098556 | AF222657 | AF474045 | AF508715 | AJ574907 | AY180574 | AY209944 | AY209990 |
| AB719892 | AF098557 | AF222658 | AF474046 | AF508724 | AJ574908 | AY180605 | AY209945 | AY209991 |
| AB719916 | AF098558 | AF222659 | AF474047 | AF508725 | AJ619676 | AY180607 | AY209946 | AY209992 |
| AB719924 | AF098559 | AF222660 | AF474048 | AF510857 | AJ619677 | AY180608 | AY209947 | AY209993 |
| AB719932 | AF116197 | AF222661 | AF508575 | AF523391 | AJ619678 | AY180609 | AY209948 | AY209994 |
| AB725327 | AF116198 | AF231356 | AF508576 | AF523392 | AJ620347 | AY180619 | AY209949 | AY209995 |
| AB725335 | AF116199 | AF231360 | AF508577 | AF523393 | AJ620348 | AY180634 | AY209950 | AY209996 |
| AB727568 | AF116200 | AF251429 | AF508578 | AF523394 | AJ620352 | AY180679 | AY209951 | AY209997 |
| AB727929 | AF116201 | AF251430 | AF508579 | AF523395 | AJ697879 | AY180680 | AY209952 | AY209998 |
| AB735625 | AF116202 | AF251431 | AF508580 | AF523396 | AJ697880 | AY180681 | AY209953 | AY209999 |
| AB739015 | AF116203 | AF251432 | AF508581 | AF523397 | AJ697881 | AY180684 | AY209954 | AY210000 |
| AB739673 | AF116204 | AF251433 | AF508582 | AF523398 | AJ973085 | AY180692 | AY209955 | AY210001 |
| AB745484 | AF116205 | AF251434 | AF508583 | AF523399 | AJ973086 | AY180700 | AY209956 | AY210002 |
| AB745485 | AF116206 | AF268102 | AF508584 | AF523400 | AM157359 | AY180730 | AY209957 | AY210003 |
| AB745486 | AF116207 | AF268113 | AF508585 | AF523401 | AM286686 | AY180731 | AY209958 | AY210004 |
| AB746484 | AF116208 | AF270716 | AF508586 | AF523402 | AM286687 | AY180757 | AY209959 | AY210005 |
| AB753179 | AF116209 | AF270717 | AF508587 | AF523403 | AM489442 | AY180758 | AY209960 | AY210006 |
| AB753187 | AF116210 | AF270718 | AF508588 | AF523404 | AM502801 | AY180768 | AY209961 | AY210007 |
| AB753194 | AF116211 | AF270719 | AF508589 | AF523405 | AX350184 | AY180769 | AY209962 | AY210008 |
| AB753203 | AF137362 | AF270720 | AF508590 | AF523406 | AX350186 | AY180813 | AY209963 | AY210009 |
| AB753210 | AF137363 | AF270721 | AF508591 | AF523407 | AX350188 | AY180814 | AY209964 | AY210010 |
| AB753219 | AF137364 | AF270722 | AF508592 | AF536709 | AX350192 | AY180815 | AY209965 | AY210011 |
| AB765634 | AF137365 | AF270723 | AF508593 | AF536710 | AX350196 | AY180816 | AY209966 | AY210012 |
| AB766241 | AF144300 | AF270724 | AF508594 | AF536711 | AX350198 | AY180817 | AY209967 | AY210013 |

|          |          |          |          |          |          |          |          |          |
|----------|----------|----------|----------|----------|----------|----------|----------|----------|
| AY210014 | AY210060 | AY210152 | AY233392 | AY254140 | AY422020 | AY619976 | AY664440 | AY700214 |
| AY210015 | AY210061 | AY210153 | AY233394 | AY254141 | AY422021 | AY633166 | AY664442 | AY700215 |
| AY210016 | AY210062 | AY210154 | AY241623 | AY254142 | AY422022 | AY633180 | AY664447 | AY700216 |
| AY210017 | AY210063 | AY210155 | AY241660 | AY254143 | AY422023 | AY633181 | AY664449 | AY700217 |
| AY210018 | AY210064 | AY210156 | AY253750 | AY254144 | AY422024 | AY633183 | AY664450 | AY703834 |
| AY210019 | AY210065 | AY210157 | AY253751 | AY254145 | AY422025 | AY633184 | AY664454 | AY706954 |
| AY210020 | AY210066 | AY210158 | AY253752 | AY254146 | AY422026 | AY633185 | AY664457 | AY724251 |
| AY210021 | AY210067 | AY210159 | AY253753 | AY254147 | AY422027 | AY633187 | AY664465 | AY724258 |
| AY210022 | AY210068 | AY210160 | AY253754 | AY254148 | AY422028 | AY633196 | AY664466 | AY724259 |
| AY210023 | AY210069 | AY210161 | AY253755 | AY254149 | AY422029 | AY633197 | AY664471 | AY724260 |
| AY210024 | AY210070 | AY210162 | AY253756 | AY262366 | AY422030 | AY633199 | AY664473 | AY724261 |
| AY210025 | AY210071 | AY210163 | AY254105 | AY262367 | AY422031 | AY633200 | AY664477 | AY724263 |
| AY210026 | AY210072 | AY210164 | AY254106 | AY295761 | AY422032 | AY633201 | AY664480 | AY724264 |
| AY210027 | AY210073 | AY210165 | AY254107 | AY300926 | AY422033 | AY633203 | AY664698 | AY747611 |
| AY210028 | AY210074 | AY210166 | AY254108 | AY300927 | AY422034 | AY633228 | AY664699 | AY747612 |
| AY210029 | AY210075 | AY210167 | AY254109 | AY300931 | AY422039 | AY633229 | AY664700 | AY747613 |
| AY210030 | AY210076 | AY210168 | AY254110 | AY300932 | AY422040 | AY633231 | AY664701 | AY747614 |
| AY210031 | AY210077 | AY210169 | AY254111 | AY300933 | AY422041 | AY633232 | AY664702 | AY747615 |
| AY210032 | AY210078 | AY210170 | AY254112 | AY300934 | AY422042 | AY633233 | AY664703 | AY747616 |
| AY210033 | AY210079 | AY210171 | AY254113 | AY300935 | AY451388 | AY633235 | AY664704 | AY747619 |
| AY210034 | AY210080 | AY210172 | AY254114 | AY300936 | AY497121 | AY633278 | AY664705 | AY747620 |
| AY210035 | AY210081 | AY210173 | AY254115 | AY300939 | AY497122 | AY633294 | AY664706 | AY747621 |
| AY210036 | AY210082 | AY210174 | AY254116 | AY300941 | AY497123 | AY633310 | AY664707 | AY747622 |
| AY210037 | AY210083 | AY210175 | AY254117 | AY300942 | AY497124 | AY633318 | AY664708 | AY747623 |
| AY210038 | AY210084 | AY210176 | AY254118 | AY300943 | AY497125 | AY633364 | AY664709 | AY747624 |
| AY210039 | AY210085 | AY210177 | AY254119 | AY300944 | AY497126 | AY633365 | AY664710 | AY768560 |
| AY210040 | AY210086 | AY210178 | AY254120 | AY300945 | AY497127 | AY633367 | AY664711 | AY768561 |
| AY210041 | AY210087 | AY210179 | AY254121 | AY330337 | AY497128 | AY633368 | AY664712 | AY768562 |
| AY210042 | AY210088 | AY210180 | AY254122 | AY330338 | AY573918 | AY633369 | AY664713 | AY768563 |
| AY210043 | AY210089 | AY210181 | AY254123 | AY330339 | AY611525 | AY633371 | AY664714 | AY768564 |
| AY210044 | AY210090 | AY210182 | AY254124 | AY330340 | AY611527 | AY633388 | AY664715 | AY768565 |
| AY210045 | AY210091 | AY210183 | AY254125 | AY330341 | AY611528 | AY633389 | AY664716 | AY768566 |
| AY210046 | AY210092 | AY210184 | AY254126 | AY340083 | AY616764 | AY633392 | AY676024 | AY779255 |
| AY210047 | AY210093 | AY210185 | AY254127 | AY340085 | AY616765 | AY633393 | AY676028 | AY779256 |
| AY210048 | AY210094 | AY210186 | AY254128 | AY340089 | AY616766 | AY633395 | AY676032 | AY785752 |
| AY210049 | AY210095 | AY210187 | AY254129 | AY340091 | AY619954 | AY646426 | AY676040 | AY785753 |
| AY210050 | AY210096 | AY210188 | AY254130 | AY342413 | AY619955 | AY653193 | AY676048 | AY785754 |
| AY210051 | AY210097 | AY210189 | AY254131 | AY342414 | AY619956 | AY653194 | AY676052 | AY785755 |
| AY210052 | AY210098 | AY210190 | AY254132 | AY342418 | AY619957 | AY653196 | AY684703 | AY785756 |
| AY210053 | AY210099 | AY210191 | AY254133 | AY342420 | AY619958 | AY653197 | AY684704 | AY785757 |
| AY210054 | AY210100 | AY210192 | AY254134 | AY342422 | AY619959 | AY653198 | AY684705 | AY800235 |
| AY210055 | AY210101 | AY233387 | AY254135 | AY342424 | AY619970 | AY653199 | AY684707 | AY831671 |
| AY210056 | AY210102 | AY233388 | AY254136 | AY342425 | AY619971 | AY664423 | AY684709 | AY831672 |
| AY210057 | AY210103 | AY233389 | AY254137 | AY342427 | AY619972 | AY664425 | AY684710 | AY831673 |
| AY210058 | AY210104 | AY233390 | AY254138 | AY422018 | AY619973 | AY664429 | AY684893 | AY849783 |
| AY210059 | AY210151 | AY233391 | AY254139 | AY422019 | AY619974 | AY664437 | AY700213 | AY849785 |

|          |          |          |          |          |          |          |          |          |
|----------|----------|----------|----------|----------|----------|----------|----------|----------|
| AY849787 | CY002955 | CY003879 | CY003937 | CY003990 | CY004452 | CY004685 | CY004991 | CY005376 |
| AY849788 | CY002957 | CY003880 | CY003939 | CY003991 | CY004483 | CY004686 | CY004992 | CY005378 |
| AY849790 | CY002958 | CY003882 | CY003940 | CY003992 | CY004485 | CY004687 | CY004993 | CY005379 |
| AY849791 | CY002959 | CY003883 | CY003941 | CY003993 | CY004486 | CY004693 | CY004994 | CY005380 |
| AY849792 | CY002960 | CY003884 | CY003942 | CY003995 | CY004487 | CY004695 | CY005044 | CY005381 |
| AY862630 | CY002961 | CY003885 | CY003943 | CY003996 | CY004488 | CY004696 | CY005046 | CY005413 |
| AY862631 | CY003089 | CY003886 | CY003944 | CY003997 | CY004489 | CY004697 | CY005047 | CY005414 |
| AY862632 | CY003091 | CY003887 | CY003945 | CY003998 | CY004517 | CY004698 | CY005048 | CY005416 |
| AY862633 | CY003092 | CY003888 | CY003947 | CY003999 | CY004524 | CY004699 | CY005049 | CY005417 |
| AY862634 | CY003093 | CY003890 | CY003948 | CY004001 | CY004525 | CY004710 | CY005050 | CY005418 |
| AY862635 | CY003094 | CY003891 | CY003949 | CY004020 | CY004526 | CY004712 | CY005066 | CY005419 |
| AY862636 | CY003095 | CY003892 | CY003950 | CY004027 | CY004527 | CY004713 | CY005086 | CY005420 |
| AY862637 | CY003457 | CY003893 | CY003951 | CY004033 | CY004528 | CY004714 | CY005087 | CY005431 |
| AY862638 | CY003459 | CY003894 | CY003952 | CY004041 | CY004529 | CY004715 | CY005088 | CY005433 |
| AY862639 | CY003460 | CY003896 | CY003953 | CY004045 | CY004530 | CY004716 | CY005089 | CY005434 |
| AY862640 | CY003461 | CY003902 | CY003955 | CY004050 | CY004540 | CY004750 | CY005090 | CY005435 |
| AY862641 | CY003462 | CY003903 | CY003956 | CY004095 | CY004541 | CY004752 | CY005091 | CY005436 |
| AY862642 | CY003463 | CY003904 | CY003957 | CY004097 | CY004542 | CY004753 | CY005108 | CY005437 |
| AY862643 | CY003847 | CY003905 | CY003958 | CY004098 | CY004543 | CY004754 | CY005114 | CY005438 |
| AY862644 | CY003848 | CY003906 | CY003959 | CY004099 | CY004544 | CY004755 | CY005116 | CY005440 |
| AY936882 | CY003850 | CY003907 | CY003960 | CY004100 | CY004545 | CY004785 | CY005117 | CY005441 |
| AY950240 | CY003851 | CY003908 | CY003961 | CY004101 | CY004554 | CY004792 | CY005118 | CY005442 |
| AY950254 | CY003852 | CY003910 | CY003963 | CY004102 | CY004555 | CY004799 | CY005119 | CY005443 |
| AY950261 | CY003853 | CY003911 | CY003964 | CY004179 | CY004557 | CY004806 | CY005120 | CY005444 |
| AY950268 | CY003854 | CY003912 | CY003965 | CY004181 | CY004558 | CY004831 | CY005142 | CY005446 |
| AY950275 | CY003855 | CY003913 | CY003966 | CY004182 | CY004559 | CY004832 | CY005155 | CY005494 |
| AY950282 | CY003856 | CY003914 | CY003967 | CY004183 | CY004560 | CY004833 | CY005250 | CY005496 |
| AY968677 | CY003858 | CY003915 | CY003968 | CY004184 | CY004561 | CY004834 | CY005252 | CY005497 |
| CY000990 | CY003859 | CY003917 | CY003969 | CY004185 | CY004568 | CY004835 | CY005253 | CY005498 |
| CY000992 | CY003860 | CY003918 | CY003971 | CY004188 | CY004570 | CY004836 | CY005254 | CY005499 |
| CY000993 | CY003861 | CY003919 | CY003972 | CY004196 | CY004571 | CY004837 | CY005255 | CY005500 |
| CY000994 | CY003862 | CY003920 | CY003973 | CY004211 | CY004572 | CY004897 | CY005256 | CY005502 |
| CY000995 | CY003863 | CY003921 | CY003974 | CY004212 | CY004573 | CY004899 | CY005287 | CY005508 |
| CY000996 | CY003864 | CY003922 | CY003975 | CY004213 | CY004574 | CY004900 | CY005306 | CY005514 |
| CY001081 | CY003866 | CY003923 | CY003976 | CY004214 | CY004578 | CY004901 | CY005344 | CY005520 |
| CY001083 | CY003867 | CY003925 | CY003977 | CY004215 | CY004600 | CY004902 | CY005346 | CY005526 |
| CY001084 | CY003868 | CY003926 | CY003979 | CY004216 | CY004602 | CY004903 | CY005347 | CY005532 |
| CY001085 | CY003869 | CY003927 | CY003980 | CY004217 | CY004603 | CY004904 | CY005348 | CY005538 |
| CY001086 | CY003870 | CY003928 | CY003981 | CY004220 | CY004604 | CY004906 | CY005349 | CY005539 |
| CY001087 | CY003871 | CY003929 | CY003982 | CY004259 | CY004605 | CY004907 | CY005350 | CY005540 |
| CY002923 | CY003872 | CY003930 | CY003983 | CY004261 | CY004606 | CY004908 | CY005351 | CY005541 |
| CY002925 | CY003874 | CY003932 | CY003984 | CY004262 | CY004621 | CY004909 | CY005353 | CY005542 |
| CY002926 | CY003875 | CY003933 | CY003985 | CY004263 | CY004678 | CY004910 | CY005354 | CY005543 |
| CY002927 | CY003876 | CY003934 | CY003987 | CY004264 | CY004681 | CY004969 | CY005355 | CY005544 |
| CY002928 | CY003877 | CY003935 | CY003988 | CY004265 | CY004683 | CY004988 | CY005356 | CY005545 |
| CY002929 | CY003878 | CY003936 | CY003989 | CY004319 | CY004684 | CY004990 | CY005357 | CY005546 |



|          |          |          |          |          |          |          |          |          |
|----------|----------|----------|----------|----------|----------|----------|----------|----------|
| CY005547 | CY005822 | CY006083 | CY009897 | CY011058 | CY012323 | CY013497 | CY014591 | CY014715 |
| CY005549 | CY005823 | CY007092 | CY009898 | CY011114 | CY012324 | CY013498 | CY014601 | CY014716 |
| CY005550 | CY005824 | CY007094 | CY009899 | CY011250 | CY012325 | CY013499 | CY014602 | CY014740 |
| CY005551 | CY005825 | CY007095 | CY010357 | CY011289 | CY012326 | CY013500 | CY014608 | CY014742 |
| CY005552 | CY005826 | CY007096 | CY010359 | CY011291 | CY012327 | CY013534 | CY014609 | CY014743 |
| CY005554 | CY005827 | CY007097 | CY010360 | CY011292 | CY012369 | CY013536 | CY014614 | CY014744 |
| CY005577 | CY005828 | CY007098 | CY010361 | CY011293 | CY012371 | CY013537 | CY014617 | CY014745 |
| CY005620 | CY005829 | CY007300 | CY010362 | CY011294 | CY012372 | CY013538 | CY014618 | CY014746 |
| CY005626 | CY005830 | CY007302 | CY010363 | CY011295 | CY012373 | CY013539 | CY014641 | CY014757 |
| CY005640 | CY005831 | CY007303 | CY010373 | CY011585 | CY012374 | CY013540 | CY014645 | CY014779 |
| CY005642 | CY005833 | CY007304 | CY010375 | CY011587 | CY012375 | CY013574 | CY014646 | CY014781 |
| CY005643 | CY005839 | CY007305 | CY010376 | CY011588 | CY012609 | CY013576 | CY014649 | CY014782 |
| CY005644 | CY005840 | CY007306 | CY010377 | CY011589 | CY012611 | CY013577 | CY014650 | CY014783 |
| CY005645 | CY005841 | CY007308 | CY010378 | CY011590 | CY012612 | CY013578 | CY014658 | CY014784 |
| CY005646 | CY005842 | CY007310 | CY010379 | CY011591 | CY012613 | CY013579 | CY014661 | CY014785 |
| CY005666 | CY005843 | CY007311 | CY010405 | CY011617 | CY012614 | CY013580 | CY014662 | CY014787 |
| CY005667 | CY005844 | CY007312 | CY010407 | CY011619 | CY012615 | CY013864 | CY014664 | CY014789 |
| CY005668 | CY005845 | CY007313 | CY010408 | CY011620 | CY012665 | CY013865 | CY014665 | CY014790 |
| CY005669 | CY005847 | CY007314 | CY010409 | CY011621 | CY012667 | CY013866 | CY014666 | CY014791 |
| CY005670 | CY005848 | CY007348 | CY010410 | CY011622 | CY012668 | CY013867 | CY014667 | CY014792 |
| CY005671 | CY005849 | CY007350 | CY010411 | CY011623 | CY012669 | CY013868 | CY014668 | CY014793 |
| CY005692 | CY005850 | CY007351 | CY010413 | CY011641 | CY012670 | CY013869 | CY014669 | CY014807 |
| CY005694 | CY005851 | CY007352 | CY010415 | CY011643 | CY012671 | CY013870 | CY014670 | CY014809 |
| CY005695 | CY005852 | CY007353 | CY010416 | CY011644 | CY012818 | CY014056 | CY014672 | CY014810 |
| CY005696 | CY005854 | CY007354 | CY010417 | CY011645 | CY012834 | CY014058 | CY014674 | CY014811 |
| CY005697 | CY005855 | CY007780 | CY010418 | CY011646 | CY013217 | CY014059 | CY014675 | CY014812 |
| CY005698 | CY005856 | CY007782 | CY010419 | CY011647 | CY013219 | CY014060 | CY014676 | CY014813 |
| CY005765 | CY005857 | CY007783 | CY010581 | CY011649 | CY013220 | CY014061 | CY014677 | CY014821 |
| CY005766 | CY005858 | CY007784 | CY010583 | CY011651 | CY013221 | CY014062 | CY014678 | CY014822 |
| CY005767 | CY005867 | CY007785 | CY010584 | CY011652 | CY013222 | CY014466 | CY014695 | CY014823 |
| CY005768 | CY005869 | CY007786 | CY010585 | CY011653 | CY013223 | CY014467 | CY014697 | CY014824 |
| CY005769 | CY005870 | CY009317 | CY010586 | CY011654 | CY013257 | CY014468 | CY014698 | CY014825 |
| CY005778 | CY005871 | CY009319 | CY010587 | CY011655 | CY013272 | CY014469 | CY014699 | CY014826 |
| CY005795 | CY005872 | CY009320 | CY010893 | CY011905 | CY013274 | CY014471 | CY014700 | CY014827 |
| CY005797 | CY005873 | CY009321 | CY010895 | CY011907 | CY013275 | CY014472 | CY014701 | CY014828 |
| CY005798 | CY005875 | CY009322 | CY010896 | CY011908 | CY013276 | CY014549 | CY014703 | CY014829 |
| CY005799 | CY005897 | CY009323 | CY010897 | CY011909 | CY013277 | CY014551 | CY014705 | CY014830 |
| CY005800 | CY005908 | CY009341 | CY010898 | CY011910 | CY013278 | CY014552 | CY014706 | CY014831 |
| CY005808 | CY005949 | CY009343 | CY010899 | CY011911 | CY013390 | CY014553 | CY014707 | CY014832 |
| CY005809 | CY006039 | CY009344 | CY010909 | CY012177 | CY013392 | CY014554 | CY014708 | CY014833 |
| CY005810 | CY006041 | CY009345 | CY010911 | CY012179 | CY013393 | CY014555 | CY014709 | CY014834 |
| CY005811 | CY006077 | CY009346 | CY010912 | CY012180 | CY013394 | CY014556 | CY014710 | CY014835 |
| CY005812 | CY006079 | CY009347 | CY010913 | CY012181 | CY013395 | CY014557 | CY014711 | CY014836 |
| CY005813 | CY006080 | CY009893 | CY010914 | CY012182 | CY013396 | CY014558 | CY014712 | CY014838 |
| CY005820 | CY006081 | CY009895 | CY010915 | CY012183 | CY013494 | CY014559 | CY014713 | CY014851 |
| CY005821 | CY006082 | CY009896 | CY011050 | CY012321 | CY013496 | CY014560 | CY014714 | CY014858 |

|          |          |          |          |          |          |          |          |          |
|----------|----------|----------|----------|----------|----------|----------|----------|----------|
| CY014860 | CY014976 | CY015117 | CY015912 | CY016628 | CY017176 | CY018878 | CY019871 | CY020126 |
| CY014861 | CY014977 | CY015128 | CY015913 | CY016630 | CY017177 | CY018880 | CY019872 | CY020128 |
| CY014862 | CY014979 | CY015130 | CY015914 | CY016631 | CY017178 | CY018881 | CY019873 | CY020129 |
| CY014863 | CY014980 | CY015131 | CY015915 | CY016632 | CY017268 | CY018882 | CY019874 | CY020130 |
| CY014864 | CY014981 | CY015132 | CY016021 | CY016633 | CY017270 | CY018883 | CY019916 | CY020131 |
| CY014873 | CY014982 | CY015133 | CY016023 | CY016634 | CY017271 | CY018884 | CY019918 | CY020132 |
| CY014874 | CY014983 | CY015134 | CY016024 | CY016780 | CY017272 | CY018895 | CY019919 | CY020134 |
| CY014875 | CY014985 | CY015135 | CY016025 | CY016782 | CY017273 | CY018902 | CY019920 | CY020136 |
| CY014876 | CY014987 | CY015136 | CY016026 | CY016783 | CY017274 | CY018904 | CY019921 | CY020137 |
| CY014877 | CY014988 | CY015138 | CY016027 | CY016784 | CY017405 | CY018905 | CY019922 | CY020138 |
| CY014878 | CY014989 | CY015139 | CY016117 | CY016785 | CY017413 | CY018906 | CY019948 | CY020139 |
| CY014879 | CY014990 | CY015140 | CY016119 | CY016786 | CY017524 | CY018907 | CY019950 | CY020140 |
| CY014882 | CY014991 | CY015141 | CY016120 | CY016788 | CY017526 | CY018908 | CY019951 | CY020150 |
| CY014889 | CY015007 | CY015142 | CY016121 | CY016790 | CY017527 | CY018951 | CY019952 | CY020152 |
| CY014890 | CY015009 | CY015143 | CY016122 | CY016791 | CY017528 | CY019740 | CY019953 | CY020153 |
| CY014891 | CY015010 | CY015144 | CY016123 | CY016792 | CY017529 | CY019742 | CY019954 | CY020154 |
| CY014892 | CY015011 | CY015145 | CY016126 | CY016793 | CY017530 | CY019743 | CY019956 | CY020155 |
| CY014893 | CY015012 | CY015146 | CY016134 | CY016794 | CY017580 | CY019744 | CY019958 | CY020156 |
| CY014894 | CY015013 | CY015453 | CY016150 | CY016820 | CY017582 | CY019745 | CY019959 | CY020174 |
| CY014895 | CY015066 | CY015461 | CY016158 | CY016822 | CY017583 | CY019746 | CY019960 | CY020176 |
| CY014897 | CY015068 | CY015549 | CY016166 | CY016823 | CY017584 | CY019748 | CY019961 | CY020177 |
| CY014902 | CY015069 | CY015551 | CY016412 | CY016824 | CY017585 | CY019750 | CY019962 | CY020178 |
| CY014903 | CY015070 | CY015552 | CY016414 | CY016825 | CY017586 | CY019751 | CY019964 | CY020179 |
| CY014904 | CY015071 | CY015553 | CY016415 | CY016826 | CY017693 | CY019752 | CY019966 | CY020180 |
| CY014905 | CY015072 | CY015554 | CY016416 | CY017004 | CY017694 | CY019753 | CY019967 | CY020182 |
| CY014906 | CY015074 | CY015555 | CY016417 | CY017006 | CY017696 | CY019754 | CY019968 | CY020184 |
| CY014907 | CY015075 | CY015621 | CY016418 | CY017007 | CY017697 | CY019764 | CY019969 | CY020185 |
| CY014908 | CY015076 | CY015623 | CY016420 | CY017008 | CY017698 | CY019766 | CY019970 | CY020186 |
| CY014910 | CY015077 | CY015624 | CY016422 | CY017009 | CY017699 | CY019767 | CY019972 | CY020187 |
| CY014912 | CY015078 | CY015625 | CY016423 | CY017010 | CY017700 | CY019768 | CY019974 | CY020188 |
| CY014913 | CY015079 | CY015626 | CY016424 | CY017028 | CY017847 | CY019769 | CY019975 | CY020190 |
| CY014914 | CY015080 | CY015627 | CY016425 | CY017030 | CY017902 | CY019770 | CY019976 | CY020192 |
| CY014915 | CY015082 | CY015765 | CY016426 | CY017031 | CY017904 | CY019772 | CY019977 | CY020193 |
| CY014916 | CY015084 | CY015767 | CY016500 | CY017032 | CY017905 | CY019774 | CY019978 | CY020194 |
| CY014917 | CY015085 | CY015768 | CY016502 | CY017033 | CY017906 | CY019775 | CY020030 | CY020195 |
| CY014918 | CY015086 | CY015769 | CY016503 | CY017034 | CY017907 | CY019776 | CY020032 | CY020196 |
| CY014919 | CY015087 | CY015770 | CY016504 | CY017044 | CY017908 | CY019777 | CY020033 | CY020230 |
| CY014920 | CY015088 | CY015771 | CY016505 | CY017046 | CY018001 | CY019778 | CY020034 | CY020231 |
| CY014921 | CY015090 | CY015797 | CY016506 | CY017047 | CY018008 | CY019860 | CY020035 | CY020232 |
| CY014923 | CY015092 | CY015799 | CY016612 | CY017048 | CY018009 | CY019862 | CY020036 | CY020233 |
| CY014969 | CY015093 | CY015800 | CY016613 | CY017049 | CY018010 | CY019863 | CY020118 | CY020234 |
| CY014971 | CY015094 | CY015801 | CY016614 | CY017050 | CY018011 | CY019864 | CY020120 | CY020235 |
| CY014972 | CY015095 | CY015802 | CY016615 | CY017077 | CY018012 | CY019865 | CY020121 | CY020236 |
| CY014973 | CY015096 | CY015803 | CY016616 | CY017172 | CY018013 | CY019866 | CY020122 | CY020286 |
| CY014974 | CY015098 | CY015909 | CY016617 | CY017174 | CY018014 | CY019868 | CY020123 | CY020288 |
| CY014975 | CY015110 | CY015911 | CY016618 | CY017175 | CY018877 | CY019870 | CY020124 | CY020289 |

|          |          |          |          |          |          |          |          |          |
|----------|----------|----------|----------|----------|----------|----------|----------|----------|
| CY020290 | CY020394 | CY020552 | CY021030 | CY021145 | CY021626 | CY021798 | CY021958 | CY022184 |
| CY020291 | CY020395 | CY020553 | CY021032 | CY021146 | CY021627 | CY021800 | CY021960 | CY022185 |
| CY020292 | CY020396 | CY020554 | CY021033 | CY021147 | CY021628 | CY021801 | CY021961 | CY022186 |
| CY020294 | CY020397 | CY020555 | CY021034 | CY021148 | CY021638 | CY021802 | CY021962 | CY022187 |
| CY020296 | CY020398 | CY020556 | CY021035 | CY021167 | CY021640 | CY021803 | CY021963 | CY022188 |
| CY020297 | CY020400 | CY020598 | CY021036 | CY021206 | CY021641 | CY021804 | CY021964 | CY022263 |
| CY020298 | CY020401 | CY020600 | CY021069 | CY021208 | CY021642 | CY021805 | CY021966 | CY022294 |
| CY020299 | CY020402 | CY020601 | CY021070 | CY021209 | CY021643 | CY021806 | CY021968 | CY022296 |
| CY020300 | CY020403 | CY020602 | CY021072 | CY021210 | CY021644 | CY021808 | CY021969 | CY022297 |
| CY020302 | CY020404 | CY020603 | CY021073 | CY021211 | CY021646 | CY021809 | CY021970 | CY022298 |
| CY020304 | CY020405 | CY020604 | CY021074 | CY021212 | CY021648 | CY021810 | CY021971 | CY022299 |
| CY020305 | CY020406 | CY020719 | CY021075 | CY021214 | CY021649 | CY021811 | CY021972 | CY022300 |
| CY020306 | CY020408 | CY020783 | CY021076 | CY021216 | CY021650 | CY021812 | CY021997 | CY022318 |
| CY020307 | CY020409 | CY020807 | CY021078 | CY021217 | CY021651 | CY021813 | CY021998 | CY022320 |
| CY020308 | CY020410 | CY020815 | CY021080 | CY021218 | CY021652 | CY021814 | CY022000 | CY022321 |
| CY020317 | CY020411 | CY020823 | CY021081 | CY021219 | CY021694 | CY021816 | CY022001 | CY022322 |
| CY020318 | CY020412 | CY020831 | CY021082 | CY021220 | CY021696 | CY021817 | CY022002 | CY022323 |
| CY020320 | CY020413 | CY020838 | CY021083 | CY021263 | CY021697 | CY021818 | CY022003 | CY022324 |
| CY020321 | CY020414 | CY020839 | CY021084 | CY021270 | CY021698 | CY021819 | CY022004 | CY022334 |
| CY020322 | CY020416 | CY020840 | CY021094 | CY021271 | CY021699 | CY021820 | CY022013 | CY022336 |
| CY020323 | CY020417 | CY020841 | CY021096 | CY021272 | CY021700 | CY021862 | CY022014 | CY022337 |
| CY020324 | CY020418 | CY020842 | CY021097 | CY021273 | CY021710 | CY021863 | CY022016 | CY022338 |
| CY020366 | CY020419 | CY020843 | CY021098 | CY021274 | CY021712 | CY021864 | CY022017 | CY022339 |
| CY020368 | CY020420 | CY020844 | CY021099 | CY021275 | CY021713 | CY021865 | CY022018 | CY022340 |
| CY020369 | CY020446 | CY020847 | CY021100 | CY021276 | CY021714 | CY021866 | CY022019 | CY022342 |
| CY020370 | CY020448 | CY020966 | CY021102 | CY021279 | CY021715 | CY021867 | CY022020 | CY022344 |
| CY020371 | CY020449 | CY020968 | CY021104 | CY021382 | CY021716 | CY021868 | CY022038 | CY022345 |
| CY020372 | CY020450 | CY020969 | CY021105 | CY021383 | CY021718 | CY021910 | CY022040 | CY022346 |
| CY020373 | CY020451 | CY020970 | CY021106 | CY021384 | CY021720 | CY021912 | CY022041 | CY022347 |
| CY020374 | CY020452 | CY020971 | CY021107 | CY021385 | CY021721 | CY021913 | CY022042 | CY022348 |
| CY020376 | CY020517 | CY020972 | CY021108 | CY021386 | CY021722 | CY021914 | CY022043 | CY022350 |
| CY020377 | CY020518 | CY020991 | CY021118 | CY021387 | CY021723 | CY021915 | CY022044 | CY022352 |
| CY020378 | CY020520 | CY021013 | CY021120 | CY021388 | CY021724 | CY021916 | CY022070 | CY022353 |
| CY020379 | CY020521 | CY021014 | CY021121 | CY021455 | CY021726 | CY021933 | CY022072 | CY022354 |
| CY020380 | CY020522 | CY021016 | CY021122 | CY021463 | CY021728 | CY021934 | CY022073 | CY022355 |
| CY020381 | CY020523 | CY021017 | CY021123 | CY021511 | CY021729 | CY021936 | CY022074 | CY022356 |
| CY020382 | CY020524 | CY021018 | CY021124 | CY021527 | CY021730 | CY021937 | CY022075 | CY022358 |
| CY020384 | CY020541 | CY021019 | CY021125 | CY021550 | CY021731 | CY021938 | CY022076 | CY022360 |
| CY020385 | CY020542 | CY021020 | CY021126 | CY021552 | CY021732 | CY021939 | CY022079 | CY022361 |
| CY020386 | CY020544 | CY021021 | CY021128 | CY021553 | CY021789 | CY021940 | CY022094 | CY022362 |
| CY020387 | CY020545 | CY021022 | CY021129 | CY021554 | CY021790 | CY021942 | CY022096 | CY022363 |
| CY020388 | CY020546 | CY021024 | CY021130 | CY021555 | CY021792 | CY021944 | CY022097 | CY022364 |
| CY020389 | CY020547 | CY021025 | CY021131 | CY021556 | CY021793 | CY021945 | CY022098 | CY022374 |
| CY020390 | CY020548 | CY021026 | CY021132 | CY021622 | CY021794 | CY021946 | CY022099 | CY022376 |
| CY020392 | CY020549 | CY021027 | CY021142 | CY021624 | CY021795 | CY021947 | CY022100 | CY022377 |
| CY020393 | CY020550 | CY021028 | CY021144 | CY021625 | CY021796 | CY021948 | CY022182 | CY022378 |

|          |          |          |          |          |          |          |          |          |
|----------|----------|----------|----------|----------|----------|----------|----------|----------|
| CY022379 | CY022585 | CY023000 | CY025006 | CY026300 | CY028177 | CY028666 | CY029978 | CY031600 |
| CY022380 | CY022586 | CY023001 | CY025007 | CY026302 | CY028178 | CY028667 | CY029979 | CY031601 |
| CY022398 | CY022587 | CY023098 | CY025008 | CY026303 | CY028237 | CY028669 | CY029981 | CY031602 |
| CY022400 | CY022588 | CY023106 | CY025009 | CY026304 | CY028244 | CY028671 | CY029983 | CY031603 |
| CY022401 | CY022622 | CY023114 | CY025051 | CY026305 | CY028245 | CY028672 | CY029984 | CY031604 |
| CY022402 | CY022624 | CY023122 | CY025053 | CY026306 | CY028246 | CY028673 | CY030886 | CY031606 |
| CY022403 | CY022625 | CY023130 | CY025054 | CY026412 | CY028247 | CY028674 | CY030887 | CY031607 |
| CY022404 | CY022626 | CY023138 | CY025055 | CY026414 | CY028248 | CY028675 | CY030888 | CY031608 |
| CY022414 | CY022627 | CY023146 | CY025056 | CY026415 | CY028249 | CY028693 | CY030890 | CY031609 |
| CY022416 | CY022628 | CY023154 | CY025057 | CY026416 | CY028250 | CY028695 | CY030892 | CY031610 |
| CY022417 | CY022630 | CY023162 | CY025070 | CY026417 | CY028252 | CY028696 | CY030893 | CY031637 |
| CY022418 | CY022631 | CY023170 | CY025072 | CY026418 | CY028254 | CY028697 | CY030995 | CY031645 |
| CY022419 | CY022632 | CY023178 | CY025073 | CY026428 | CY028255 | CY028698 | CY031030 | CY031653 |
| CY022420 | CY022633 | CY023186 | CY025074 | CY026430 | CY028256 | CY028699 | CY031070 | CY031677 |
| CY022430 | CY022634 | CY023194 | CY025075 | CY026431 | CY028257 | CY028781 | CY031078 | CY031685 |
| CY022432 | CY022635 | CY023202 | CY025076 | CY026432 | CY028258 | CY028783 | CY031118 | CY031693 |
| CY022433 | CY022636 | CY023210 | CY025126 | CY026433 | CY028284 | CY028784 | CY031126 | CY031701 |
| CY022434 | CY022639 | CY023218 | CY025128 | CY026434 | CY028286 | CY028785 | CY031190 | CY031709 |
| CY022435 | CY022686 | CY023226 | CY025129 | CY026444 | CY028287 | CY028786 | CY031214 | CY031717 |
| CY022436 | CY022688 | CY023234 | CY025130 | CY026446 | CY028288 | CY028787 | CY031222 | CY031725 |
| CY022438 | CY022689 | CY023242 | CY025131 | CY026447 | CY028289 | CY028789 | CY031230 | CY031733 |
| CY022440 | CY022690 | CY023250 | CY025132 | CY026448 | CY028290 | CY028791 | CY031246 | CY031749 |
| CY022441 | CY022691 | CY023258 | CY025198 | CY026449 | CY028509 | CY028792 | CY031255 | CY031765 |
| CY022442 | CY022692 | CY023266 | CY025200 | CY026450 | CY028517 | CY028793 | CY031261 | CY031773 |
| CY022443 | CY022702 | CY023274 | CY025201 | CY027156 | CY028525 | CY028794 | CY031269 | CY031800 |
| CY022444 | CY022704 | CY023282 | CY025202 | CY027158 | CY028542 | CY028795 | CY031277 | CY031812 |
| CY022470 | CY022705 | CY023290 | CY025203 | CY027159 | CY028574 | CY029835 | CY031285 | CY032214 |
| CY022472 | CY022706 | CY023298 | CY025204 | CY027160 | CY028582 | CY029874 | CY031337 | CY032216 |
| CY022473 | CY022707 | CY023306 | CY026140 | CY027161 | CY028598 | CY029876 | CY031579 | CY032217 |
| CY022474 | CY022708 | CY024787 | CY026142 | CY027162 | CY028630 | CY029877 | CY031580 | CY032218 |
| CY022475 | CY022743 | CY024789 | CY026143 | CY027292 | CY028645 | CY029878 | CY031582 | CY032219 |
| CY022476 | CY022767 | CY024790 | CY026144 | CY027294 | CY028647 | CY029879 | CY031583 | CY032220 |
| CY022478 | CY022815 | CY024791 | CY026145 | CY027295 | CY028648 | CY029880 | CY031584 | CY032237 |
| CY022480 | CY022823 | CY024792 | CY026146 | CY027296 | CY028649 | CY029898 | CY031585 | CY032238 |
| CY022481 | CY022831 | CY024793 | CY026284 | CY027297 | CY028650 | CY029900 | CY031586 | CY032240 |
| CY022482 | CY022847 | CY024812 | CY026286 | CY027298 | CY028651 | CY029901 | CY031587 | CY032241 |
| CY022483 | CY022955 | CY024819 | CY026287 | CY027524 | CY028653 | CY029902 | CY031588 | CY032242 |
| CY022484 | CY022957 | CY024821 | CY026288 | CY027526 | CY028655 | CY029903 | CY031590 | CY032243 |
| CY022510 | CY022958 | CY024822 | CY026289 | CY027527 | CY028656 | CY029904 | CY031591 | CY032244 |
| CY022512 | CY022959 | CY024823 | CY026290 | CY027528 | CY028657 | CY029922 | CY031592 | CY032245 |
| CY022513 | CY022960 | CY024824 | CY026292 | CY027529 | CY028658 | CY029924 | CY031593 | CY032246 |
| CY022514 | CY022961 | CY024825 | CY026294 | CY027530 | CY028659 | CY029925 | CY031594 | CY032248 |
| CY022515 | CY022995 | CY024836 | CY026295 | CY028172 | CY028661 | CY029926 | CY031595 | CY032249 |
| CY022516 | CY022997 | CY024844 | CY026296 | CY028174 | CY028663 | CY029927 | CY031596 | CY032250 |
| CY022582 | CY022998 | CY025003 | CY026297 | CY028175 | CY028664 | CY029928 | CY031598 | CY032251 |
| CY022584 | CY022999 | CY025005 | CY026298 | CY028176 | CY028665 | CY029977 | CY031599 | CY032252 |

|          |               |          |          |          |          |          |          |          |
|----------|---------------|----------|----------|----------|----------|----------|----------|----------|
| CY032253 | CY032975      | CY033583 | CY034052 | CY034192 | CY035023 | CY035242 | CY035604 | CY036763 |
| CY032254 | CY032975CY021 | CY033584 | CY034053 | CY034240 | CY035025 | CY035244 | CY035605 | CY036764 |
| CY032256 | CY032976      | CY033607 | CY034055 | CY034248 | CY035026 | CY035245 | CY035606 | CY036765 |
| CY032257 | CY033162      | CY033609 | CY034056 | CY034264 | CY035027 | CY035457 | CY035796 | CY036766 |
| CY032258 | CY033163      | CY033610 | CY034057 | CY034272 | CY035028 | CY035458 | CY035797 | CY036792 |
| CY032259 | CY033164      | CY033611 | CY034058 | CY034280 | CY035029 | CY035471 | CY035798 | CY036794 |
| CY032260 | CY033165      | CY033612 | CY034059 | CY034288 | CY035071 | CY035472 | CY035800 | CY036795 |
| CY032261 | CY033166      | CY033613 | CY034060 | CY034304 | CY035073 | CY035473 | CY035802 | CY036796 |
| CY032262 | CY033167      | CY033615 | CY034061 | CY034312 | CY035074 | CY035477 | CY035803 | CY036797 |
| CY032264 | CY033168      | CY033617 | CY034063 | CY034344 | CY035075 | CY035478 | CY035828 | CY036798 |
| CY032265 | CY033170      | CY033618 | CY034064 | CY034360 | CY035076 | CY035479 | CY035829 | CY036800 |
| CY032266 | CY033172      | CY033619 | CY034065 | CY034368 | CY035077 | CY035480 | CY035830 | CY036802 |
| CY032267 | CY033173      | CY033620 | CY034066 | CY034376 | CY035078 | CY035481 | CY035832 | CY036803 |
| CY032268 | CY033174      | CY033621 | CY034067 | CY034392 | CY035079 | CY035482 | CY035834 | CY036804 |
| CY032269 | CY033175      | CY033623 | CY034068 | CY034682 | CY035081 | CY035483 | CY035835 | CY036805 |
| CY032270 | CY033176      | CY033625 | CY034069 | CY034709 | CY035082 | CY035484 | CY035924 | CY036806 |
| CY032272 | CY033203      | CY033626 | CY034071 | CY034710 | CY035083 | CY035485 | CY035932 | CY036815 |
| CY032273 | CY033211      | CY033627 | CY034072 | CY034711 | CY035084 | CY035486 | CY035948 | CY036816 |
| CY032274 | CY033227      | CY033628 | CY034073 | CY034713 | CY035085 | CY035487 | CY035956 | CY036818 |
| CY032275 | CY033235      | CY033629 | CY034074 | CY034715 | CY035183 | CY035488 | CY035980 | CY036819 |
| CY032276 | CY033243      | CY033639 | CY034075 | CY034716 | CY035185 | CY035496 | CY035988 | CY036820 |
| CY032277 | CY033251      | CY033641 | CY034076 | CY034760 | CY035186 | CY035497 | CY035996 | CY036821 |
| CY032278 | CY033259      | CY033642 | CY034077 | CY034775 | CY035187 | CY035498 | CY036004 | CY036822 |
| CY032280 | CY033267      | CY033643 | CY034079 | CY034777 | CY035188 | CY035499 | CY036012 | CY036824 |
| CY032281 | CY033283      | CY033644 | CY034080 | CY034778 | CY035189 | CY035500 | CY036036 | CY036826 |
| CY032282 | CY033299      | CY033645 | CY034081 | CY034779 | CY035199 | CY035508 | CY036558 | CY036827 |
| CY032283 | CY033307      | CY033647 | CY034082 | CY034780 | CY035201 | CY035513 | CY036559 | CY036828 |
| CY032284 | CY033315      | CY033649 | CY034083 | CY034781 | CY035202 | CY035514 | CY036560 | CY036829 |
| CY032285 | CY033337      | CY033650 | CY034101 | CY034792 | CY035203 | CY035515 | CY036561 | CY036830 |
| CY032286 | CY033338      | CY033651 | CY034103 | CY034800 | CY035204 | CY035555 | CY036567 | CY036848 |
| CY032288 | CY033339      | CY033652 | CY034104 | CY034808 | CY035205 | CY035556 | CY036568 | CY036850 |
| CY032289 | CY033340      | CY033653 | CY034105 | CY034816 | CY035215 | CY035557 | CY036569 | CY036851 |
| CY032290 | CY033341      | CY033980 | CY034106 | CY034832 | CY035217 | CY035570 | CY036570 | CY036852 |
| CY032291 | CY033343      | CY033981 | CY034107 | CY034840 | CY035218 | CY035571 | CY036571 | CY036853 |
| CY032292 | CY033446      | CY033983 | CY034117 | CY034848 | CY035219 | CY035572 | CY036572 | CY036854 |
| CY032698 | CY033473      | CY033984 | CY034119 | CY034896 | CY035220 | CY035581 | CY036573 | CY036904 |
| CY032897 | CY033474      | CY033985 | CY034120 | CY034904 | CY035221 | CY035582 | CY036574 | CY036906 |
| CY032898 | CY033476      | CY033986 | CY034121 | CY034912 | CY035231 | CY035583 | CY036575 | CY036907 |
| CY032899 | CY033477      | CY033987 | CY034122 | CY034926 | CY035233 | CY035596 | CY036576 | CY036908 |
| CY032901 | CY033478      | CY034044 | CY034123 | CY034927 | CY035234 | CY035597 | CY036577 | CY036909 |
| CY032903 | CY033479      | CY034045 | CY034125 | CY034929 | CY035235 | CY035598 | CY036578 | CY036910 |
| CY032904 | CY033480      | CY034047 | CY034127 | CY034930 | CY035236 | CY035599 | CY036579 | CY037008 |
| CY032970 | CY033578      | CY034048 | CY034128 | CY034931 | CY035237 | CY035600 | CY036580 | CY037010 |
| CY032972 | CY033580      | CY034049 | CY034129 | CY034932 | CY035238 | CY035601 | CY036760 | CY037011 |
| CY032973 | CY033581      | CY034050 | CY034130 | CY034933 | CY035239 | CY035602 | CY036761 | CY037012 |
| CY032974 | CY033582      | CY034051 | CY034131 | CY034990 | CY035240 | CY035603 | CY036762 | CY037013 |

|          |          |          |          |            |          |          |            |          |
|----------|----------|----------|----------|------------|----------|----------|------------|----------|
| CY037014 | CY038162 | CY039693 | CY041236 | CY042275   | CY044326 | CY047422 | CY049774   | CY054349 |
| CY037017 | CY038396 | CY039695 | CY041237 | CY042276   | CY044328 | CY047424 | CY053465   | CY054350 |
| CY037041 | CY038404 | CY039696 | CY041238 | CY042277   | CY044329 | CY047428 | CY053823   | CY054351 |
| CY037049 | CY038412 | CY039697 | CY041239 | CY042279   | CY044330 | CY047429 | CY054304   | CY054352 |
| CY037057 | CY038420 | CY039698 | CY041240 | CY042280   | CY044331 | CY047449 | CY054305   | CY054353 |
| CY037065 | CY038428 | CY039699 | CY041241 | CY042281   | CY044332 | CY047498 | CY054306   | CY054354 |
| CY037097 | CY038436 | CY039700 | CY041252 | CY042283   | CY045249 | CY047562 | CY054307   | CY054355 |
| CY037295 | CY038444 | CY039701 | CY041268 | CY042284   | CY045279 | CY047594 | CY054309   | CY054356 |
| CY037304 | CY038452 | CY039702 | CY041276 | CY042285   | CY045280 | CY047602 | CY054310   | CY054357 |
| CY037306 | CY038460 | CY039703 | CY041330 | CY042286   | CY045282 | CY047634 | CY054311   | CY054358 |
| CY037307 | CY038468 | CY039704 | CY041331 | CY042288   | CY045283 | CY047650 | CY054312   | CY054359 |
| CY037308 | CY038476 | CY039705 | CY041333 | CY042289   | CY045284 | CY047658 | CY054313   | CY054360 |
| CY037309 | CY038484 | CY039706 | CY041335 | CY042290   | CY045285 | CY047664 | CY054314   | CY054361 |
| CY037310 | CY038504 | CY039707 | CY041336 | CY042291   | CY045286 | CY047665 | CY054315   | CY054362 |
| CY037312 | CY038506 | CY039708 | CY041337 | CY042292   | CY045287 | CY047667 | CY054316   | CY054363 |
| CY037314 | CY038507 | CY039710 | CY041364 | CY042293   | CY045288 | CY047668 | CY054317   | CY054364 |
| CY037315 | CY038508 | CY039711 | CY041388 | CY042294   | CY045290 | CY047669 | CY054319   | CY054365 |
| CY037316 | CY038509 | CY039712 | CY041396 | CY042307   | CY045292 | CY047670 | CY054320   | CY054366 |
| CY037317 | CY038510 | CY039713 | CY041420 | CY042496   | CY045293 | CY047671 | CY054321   | CY054368 |
| CY037318 | CY039088 | CY039714 | CY041428 | CY042497   | CY045294 | CY047674 | CY054322   | CY054369 |
| CY037320 | CY039090 | CY039715 | CY041436 | CY042584   | CY045321 | CY047706 | CY054323   | CY054370 |
| CY037322 | CY039091 | CY039716 | CY041889 | CY042603   | CY045345 | CY048654 | CY054324   | CY054371 |
| CY037323 | CY039092 | CY039718 | CY042074 | CY042911   | CY045473 | CY048699 | CY054325   | CY054373 |
| CY037324 | CY039093 | CY039719 | CY042075 | CY042912   | CY045788 | CY048703 | CY054326   | CY054376 |
| CY037325 | CY039094 | CY039807 | CY042098 | CY042913   | CY045789 | CY048705 | CY054327   | CY054377 |
| CY037326 | CY039265 | CY039808 | CY042099 | CY042914   | CY045791 | CY048707 | CY054328   | CY054378 |
| CY037344 | CY039369 | CY039809 | CY042103 | CY043315.1 | CY045792 | CY048708 | CY054329   | CY054379 |
| CY037346 | CY039377 | CY039811 | CY042131 | CY043316.1 | CY045793 | CY048709 | CY054330   | CY054380 |
| CY037347 | CY039383 | CY039813 | CY042150 | CY043317.1 | CY045794 | CY048710 | CY054331   | CY054381 |
| CY037348 | CY039384 | CY039814 | CY042163 | CY043318.1 | CY045795 | CY048711 | CY054332   | CY054382 |
| CY037349 | CY039386 | CY039918 | CY042183 | CY043319.1 | CY045796 | CY048712 | CY054333   | CY054383 |
| CY037350 | CY039387 | CY039920 | CY042213 | CY043320.1 | CY045804 | CY048715 | CY054334   | CY054384 |
| CY037352 | CY039388 | CY039921 | CY042256 | CY043322.1 | CY045805 | CY048716 | CY054335   | CY054385 |
| CY037354 | CY039389 | CY039922 | CY042257 | CY043323.1 | CY045807 | CY048719 | CY054336   | CY054386 |
| CY037355 | CY039390 | CY039923 | CY042262 | CY043324.1 | CY045808 | CY048721 | CY054337   | CY054387 |
| CY037356 | CY039681 | CY039924 | CY042263 | CY043326.1 | CY045809 | CY048732 | CY054338   | CY054388 |
| CY037357 | CY039682 | CY041226 | CY042264 | CY043327.1 | CY045810 | CY048735 | CY054339   | CY054389 |
| CY037358 | CY039683 | CY041227 | CY042265 | CY043328.1 | CY045811 | CY048738 | CY054340   | CY054390 |
| CY037751 | CY039684 | CY041228 | CY042266 | CY043329.1 | CY045812 | CY048741 | CY054341   | CY054391 |
| CY037752 | CY039685 | CY041229 | CY042268 | CY043818   | CY045820 | CY048742 | CY054342   | CY054392 |
| CY037753 | CY039687 | CY041230 | CY042269 | CY043834   | CY046126 | CY048743 | CY054343   | CY054393 |
| CY037755 | CY039688 | CY041231 | CY042270 | CY043858   | CY046176 | CY048744 | CY054344.1 | CY054394 |
| CY037757 | CY039689 | CY041232 | CY042271 | CY043866   | CY047005 | CY048780 | CY054345   | CY054395 |
| CY037758 | CY039690 | CY041233 | CY042272 | CY043914   | CY047397 | CY048808 | CY054346   | CY054396 |
| CY038032 | CY039691 | CY041234 | CY042273 | CY044317   | CY047401 | CY048919 | CY054347   | CY054397 |
| CY038157 | CY039692 | CY041235 | CY042274 | CY044325   | CY047402 | CY049758 | CY054348   | CY054398 |

|          |            |          |          |          |          |          |          |          |
|----------|------------|----------|----------|----------|----------|----------|----------|----------|
| CY054399 | CY054446   | CY055134 | CY067696 | CY077456 | CY077901 | CY079483 | CY089641 | CY094711 |
| CY054400 | CY054447   | CY055135 | CY067712 | CY077498 | CY077902 | CY079492 | CY089642 | CY094719 |
| CY054401 | CY054448   | CY055182 | CY068645 | CY077500 | CY077903 | CY079493 | CY089643 | CY094727 |
| CY054402 | CY054449   | CY055187 | CY068653 | CY077501 | CY077904 | CY079495 | CY089644 | CY094735 |
| CY054403 | CY054450   | CY056358 | CY068661 | CY077502 | CY077905 | CY079496 | CY093090 | CY094880 |
| CY054404 | CY054451   | CY056359 | CY068668 | CY077504 | CY077907 | CY079497 | CY093098 | CY094882 |
| CY054405 | CY054452   | CY056360 | CY073802 | CY077515 | CY077908 | CY079498 | CY093593 | CY094883 |
| CY054406 | CY054453   | CY056361 | CY075967 | CY077523 | CY078275 | CY079499 | CY093633 | CY094884 |
| CY054407 | CY054454   | CY056362 | CY076087 | CY077530 | CY078291 | CY079648 | CY093704 | CY094885 |
| CY054408 | CY054455   | CY060150 | CY076143 | CY077532 | CY078299 | CY080417 | CY093744 | CY094886 |
| CY054409 | CY054456   | CY060270 | CY076151 | CY077533 | CY078315 | CY081266 | CY093776 | CY094937 |
| CY054410 | CY054457   | CY060302 | CY076159 | CY077534 | CY078347 | CY081382 | CY093880 | CY094953 |
| CY054411 | CY054458   | CY060318 | CY076183 | CY077536 | CY078501 | CY084426 | CY093894 | CY094985 |
| CY054412 | CY054459   | CY060325 | CY076199 | CY077539 | CY078509 | CY084428 | CY093895 | CY094991 |
| CY054413 | CY054460   | CY060363 | CY076255 | CY077569 | CY078579 | CY087173 | CY093897 | CY094998 |
| CY054414 | CY054461   | CY060364 | CY076271 | CY077571 | CY078580 | CY087181 | CY093898 | CY095014 |
| CY054415 | CY054462   | CY060365 | CY076311 | CY077572 | CY078582 | CY087189 | CY093899 | CY095038 |
| CY054416 | CY054464   | CY060366 | CY076623 | CY077573 | CY078583 | CY087754 | CY093900 | CY095046 |
| CY054417 | CY054465   | CY060367 | CY076631 | CY077575 | CY078584 | CY087792 | CY093901 | CY095054 |
| CY054418 | CY054466   | CY060369 | CY076725 | CY077687 | CY078585 | CY087793 | CY094015 | CY095102 |
| CY054419 | CY054467.1 | CY060370 | CY076800 | CY077730 | CY078586 | CY087795 | CY094095 | CY095110 |
| CY054420 | CY054469   | CY060394 | CY076801 | CY077731 | CY078691 | CY087797 | CY094151 | CY095118 |
| CY054421 | CY054470   | CY060395 | CY076803 | CY077732 | CY078692 | CY087798 | CY094159 | CY095126 |
| CY054422 | CY054471   | CY060396 | CY076804 | CY077733 | CY078694 | CY087799 | CY094255 | CY095166 |
| CY054423 | CY054472   | CY060397 | CY076805 | CY077734 | CY078695 | CY087800 | CY094303 | CY095172 |
| CY054424 | CY054473   | CY060399 | CY076806 | CY077736 | CY078696 | CY087801 | CY094311 | CY095173 |
| CY054425 | CY054474   | CY060400 | CY076807 | CY077737 | CY078697 | CY087803 | CY094365 | CY095175 |
| CY054426 | CY054475   | CY060421 | CY076826 | CY077738 | CY078698 | CY087805 | CY094366 | CY095176 |
| CY054427 | CY054476   | CY060422 | CY076840 | CY077739 | CY079342 | CY087806 | CY094368 | CY095177 |
| CY054428 | CY054477   | CY060423 | CY076841 | CY077740 | CY079350 | CY087807 | CY094369 | CY095178 |
| CY054429 | CY054478   | CY060424 | CY076843 | CY077741 | CY079364 | CY087825 | CY094370 | CY095179 |
| CY054430 | CY054479   | CY060425 | CY076844 | CY077743 | CY079365 | CY087826 | CY094371 | CY095180 |
| CY054431 | CY054482   | CY060427 | CY076845 | CY077744 | CY079367 | CY087827 | CY094372 | CY095181 |
| CY054432 | CY054483   | CY060441 | CY076846 | CY077783 | CY079368 | CY087828 | CY094447 | CY095183 |
| CY054433 | CY054485   | CY064944 | CY076847 | CY077784 | CY079369 | CY087829 | CY094511 | CY095184 |
| CY054434 | CY054486   | CY064947 | CY076874 | CY077785 | CY079370 | CY087830 | CY094583 | CY095185 |
| CY054435 | CY054489.1 | CY064948 | CY076894 | CY077786 | CY079371 | CY087831 | CY094591 | CY095186 |
| CY054436 | CY054527   | CY064949 | CY076923 | CY077787 | CY079430 | CY087833 | CY094599 | CY095187 |
| CY054437 | CY054530   | CY064950 | CY076931 | CY077789 | CY079438 | CY087835 | CY094615 | CY095188 |
| CY054439 | CY054537   | CY064951 | CY077086 | CY077790 | CY079454 | CY087836 | CY094631 | CY095189 |
| CY054440 | CY054538   | CY064953 | CY077128 | CY077894 | CY079476 | CY087837 | CY094639 | CY095191 |
| CY054441 | CY054545   | CY064954 | CY077144 | CY077895 | CY079477 | CY087838 | CY094647 | CY095192 |
| CY054442 | CY055107   | CY067271 | CY077450 | CY077896 | CY079479 | CY087839 | CY094655 | CY095193 |
| CY054443 | CY055108   | CY067272 | CY077452 | CY077897 | CY079480 | CY088723 | CY094663 | CY095194 |
| CY054444 | CY055115   | CY067273 | CY077453 | CY077898 | CY079481 | CY089638 | CY094671 | CY095195 |
| CY054445 | CY055116   | CY067274 | CY077454 | CY077900 | CY079482 | CY089640 | CY094695 | CY095254 |

|          |          |          |          |          |          |          |          |          |
|----------|----------|----------|----------|----------|----------|----------|----------|----------|
| CY095262 | CY097339 | CY101383 | CY102228 | CY103524 | CY109932 | CY110302 | CY114386 | CY116750 |
| CY095270 | CY097340 | CY101385 | CY102229 | CY103525 | CY109934 | CY110320 | CY114387 | CY116751 |
| CY095285 | CY097341 | CY101386 | CY102231 | CY103526 | CY109936 | CY110328 | CY114388 | CY116752 |
| CY095293 | CY097344 | CY101387 | CY102232 | CY103527 | CY109938 | CY110336 | CY114430 | CY116753 |
| CY095301 | CY097374 | CY101388 | CY102233 | CY103528 | CY109940 | CY110344 | CY114432 | CY116754 |
| CY095317 | CY097375 | CY101389 | CY102234 | CY103530 | CY109942 | CY110360 | CY114433 | CY116755 |
| CY095333 | CY097377 | CY101424 | CY102235 | CY103531 | CY109944 | CY110364 | CY114434 | CY116756 |
| CY095364 | CY097378 | CY101474 | CY102260 | CY103532 | CY109948 | CY110380 | CY114435 | CY116757 |
| CY095380 | CY097379 | CY101475 | CY102261 | CY103533 | CY109952 | CY110384 | CY114436 | CY116758 |
| CY095388 | CY097380 | CY101477 | CY102263 | CY103534 | CY109960 | CY110388 | CY114462 | CY116759 |
| CY095396 | CY097381 | CY101478 | CY102264 | CY108939 | CY109962 | CY110390 | CY114464 | CY116760 |
| CY095412 | CY097432 | CY101479 | CY102265 | CY109228 | CY109972 | CY110400 | CY114465 | CY116761 |
| CY095476 | CY097440 | CY101480 | CY102266 | CY109236 | CY109978 | CY110440 | CY114466 | CY116762 |
| CY095492 | CY097448 | CY101481 | CY102267 | CY109244 | CY109980 | CY110586 | CY114467 | CY116763 |
| CY095500 | CY097456 | CY101547 | CY102332 | CY109252 | CY109988 | CY110674 | CY114468 | CY116764 |
| CY096055 | CY097472 | CY101548 | CY102333 | CY109276 | CY110004 | CY110926 | CY116615 | CY116765 |
| CY096615 | CY097480 | CY101550 | CY102335 | CY109292 | CY110010 | CY110929 | CY116617 | CY116766 |
| CY096626 | CY097488 | CY101551 | CY102336 | CY109308 | CY110026 | CY110935 | CY116619 | CY116767 |
| CY096634 | CY097496 | CY101552 | CY102337 | CY109316 | CY110030 | CY111592 | CY116621 | CY116768 |
| CY096642 | CY097560 | CY101553 | CY102338 | CY109332 | CY110038 | CY112918 | CY116723 | CY116769 |
| CY096936 | CY097592 | CY101554 | CY102339 | CY109348 | CY110052 | CY112920 | CY116724 | CY116770 |
| CY096980 | CY097598 | CY101555 | CY102350 | CY109356 | CY110084 | CY112921 | CY116725 | CY116771 |
| CY096988 | CY097599 | CY101556 | CY102358 | CY109380 | CY110090 | CY112922 | CY116726 | CY116772 |
| CY096994 | CY097601 | CY101558 | CY102366 | CY109388 | CY110094 | CY112923 | CY116727 | CY116773 |
| CY096995 | CY097602 | CY101559 | CY102382 | CY109396 | CY110096 | CY112924 | CY116728 | CY116774 |
| CY096997 | CY097603 | CY101560 | CY102398 | CY109412 | CY110100 | CY113006 | CY116729 | CY116775 |
| CY096998 | CY097604 | CY101561 | CY102406 | CY109420 | CY110102 | CY113008 | CY116730 | CY116776 |
| CY096999 | CY097605 | CY101562 | CY102441 | CY109428 | CY110104 | CY113009 | CY116731 | CY116777 |
| CY097000 | CY097632 | CY101841 | CY102449 | CY109444 | CY110106 | CY113010 | CY116732 | CY116778 |
| CY097001 | CY098224 | CY101843 | CY102457 | CY109468 | CY110114 | CY113011 | CY116733 | CY116779 |
| CY097020 | CY098631 | CY101844 | CY102478 | CY109484 | CY110156 | CY113012 | CY116734 | CY116780 |
| CY097178 | CY098632 | CY101845 | CY102486 | CY109508 | CY110158 | CY113678 | CY116735 | CY116781 |
| CY097197 | CY098633 | CY101846 | CY102494 | CY109540 | CY110164 | CY113680 | CY116736 | CY116782 |
| CY097203 | CY098635 | CY101847 | CY102502 | CY109564 | CY110180 | CY113681 | CY116737 | CY116783 |
| CY097204 | CY098637 | CY101858 | CY102510 | CY109588 | CY110188 | CY113682 | CY116738 | CY116784 |
| CY097206 | CY099337 | CY101874 | CY102518 | CY109620 | CY110196 | CY113683 | CY116739 | CY116785 |
| CY097207 | CY099339 | CY101892 | CY102576 | CY109644 | CY110212 | CY113684 | CY116740 | CY116786 |
| CY097208 | CY099341 | CY102005 | CY102592 | CY109668 | CY110220 | CY114118 | CY116741 | CY116787 |
| CY097209 | CY099347 | CY102102 | CY102643 | CY109676 | CY110228 | CY114120 | CY116742 | CY116788 |
| CY097210 | CY099351 | CY102220 | CY102730 | CY109692 | CY110236 | CY114121 | CY116743 | CY116789 |
| CY097213 | CY099353 | CY102221 | CY103001 | CY109700 | CY110256 | CY114122 | CY116744 | CY116790 |
| CY097328 | CY099355 | CY102223 | CY103461 | CY109708 | CY110262 | CY114123 | CY116745 | CY116791 |
| CY097334 | CY099363 | CY102224 | CY103519 | CY109748 | CY110270 | CY114124 | CY116746 | CY116792 |
| CY097335 | CY101260 | CY102225 | CY103520 | CY109876 | CY110278 | CY114382 | CY116747 | CY116793 |
| CY097337 | CY101325 | CY102226 | CY103522 | CY109920 | CY110286 | CY114384 | CY116748 | CY116794 |
| CY097338 | CY101382 | CY102227 | CY103523 | CY109928 | CY110294 | CY114385 | CY116749 | CY116795 |



|          |          |          |          |          |          |          |          |          |
|----------|----------|----------|----------|----------|----------|----------|----------|----------|
| CY116796 | CY116842 | CY116888 | CY116934 | CY116980 | CY117026 | CY117072 | CY117118 | CY117164 |
| CY116797 | CY116843 | CY116889 | CY116935 | CY116981 | CY117027 | CY117073 | CY117119 | CY117165 |
| CY116798 | CY116844 | CY116890 | CY116936 | CY116982 | CY117028 | CY117074 | CY117120 | CY117166 |
| CY116799 | CY116845 | CY116891 | CY116937 | CY116983 | CY117029 | CY117075 | CY117121 | CY117167 |
| CY116800 | CY116846 | CY116892 | CY116938 | CY116984 | CY117030 | CY117076 | CY117122 | CY117168 |
| CY116801 | CY116847 | CY116893 | CY116939 | CY116985 | CY117031 | CY117077 | CY117123 | CY117169 |
| CY116802 | CY116848 | CY116894 | CY116940 | CY116986 | CY117032 | CY117078 | CY117124 | CY117170 |
| CY116803 | CY116849 | CY116895 | CY116941 | CY116987 | CY117033 | CY117079 | CY117125 | CY117171 |
| CY116804 | CY116850 | CY116896 | CY116942 | CY116988 | CY117034 | CY117080 | CY117126 | CY117172 |
| CY116805 | CY116851 | CY116897 | CY116943 | CY116989 | CY117035 | CY117081 | CY117127 | CY117173 |
| CY116806 | CY116852 | CY116898 | CY116944 | CY116990 | CY117036 | CY117082 | CY117128 | CY117174 |
| CY116807 | CY116853 | CY116899 | CY116945 | CY116991 | CY117037 | CY117083 | CY117129 | CY117175 |
| CY116808 | CY116854 | CY116900 | CY116946 | CY116992 | CY117038 | CY117084 | CY117130 | CY117176 |
| CY116809 | CY116855 | CY116901 | CY116947 | CY116993 | CY117039 | CY117085 | CY117131 | CY117177 |
| CY116810 | CY116856 | CY116902 | CY116948 | CY116994 | CY117040 | CY117086 | CY117132 | CY117178 |
| CY116811 | CY116857 | CY116903 | CY116949 | CY116995 | CY117041 | CY117087 | CY117133 | CY117179 |
| CY116812 | CY116858 | CY116904 | CY116950 | CY116996 | CY117042 | CY117088 | CY117134 | CY117180 |
| CY116813 | CY116859 | CY116905 | CY116951 | CY116997 | CY117043 | CY117089 | CY117135 | CY117181 |
| CY116814 | CY116860 | CY116906 | CY116952 | CY116998 | CY117044 | CY117090 | CY117136 | CY117182 |
| CY116815 | CY116861 | CY116907 | CY116953 | CY116999 | CY117045 | CY117091 | CY117137 | CY117183 |
| CY116816 | CY116862 | CY116908 | CY116954 | CY117000 | CY117046 | CY117092 | CY117138 | CY117184 |
| CY116817 | CY116863 | CY116909 | CY116955 | CY117001 | CY117047 | CY117093 | CY117139 | CY117185 |
| CY116818 | CY116864 | CY116910 | CY116956 | CY117002 | CY117048 | CY117094 | CY117140 | CY117186 |
| CY116819 | CY116865 | CY116911 | CY116957 | CY117003 | CY117049 | CY117095 | CY117141 | CY117187 |
| CY116820 | CY116866 | CY116912 | CY116958 | CY117004 | CY117050 | CY117096 | CY117142 | CY117188 |
| CY116821 | CY116867 | CY116913 | CY116959 | CY117005 | CY117051 | CY117097 | CY117143 | CY117189 |
| CY116822 | CY116868 | CY116914 | CY116960 | CY117006 | CY117052 | CY117098 | CY117144 | CY117190 |
| CY116823 | CY116869 | CY116915 | CY116961 | CY117007 | CY117053 | CY117099 | CY117145 | CY117191 |
| CY116824 | CY116870 | CY116916 | CY116962 | CY117008 | CY117054 | CY117100 | CY117146 | CY117192 |
| CY116825 | CY116871 | CY116917 | CY116963 | CY117009 | CY117055 | CY117101 | CY117147 | CY117193 |
| CY116826 | CY116872 | CY116918 | CY116964 | CY117010 | CY117056 | CY117102 | CY117148 | CY117194 |
| CY116827 | CY116873 | CY116919 | CY116965 | CY117011 | CY117057 | CY117103 | CY117149 | CY117195 |
| CY116828 | CY116874 | CY116920 | CY116966 | CY117012 | CY117058 | CY117104 | CY117150 | CY117196 |
| CY116829 | CY116875 | CY116921 | CY116967 | CY117013 | CY117059 | CY117105 | CY117151 | CY117197 |
| CY116830 | CY116876 | CY116922 | CY116968 | CY117014 | CY117060 | CY117106 | CY117152 | CY117198 |
| CY116831 | CY116877 | CY116923 | CY116969 | CY117015 | CY117061 | CY117107 | CY117153 | CY117199 |
| CY116832 | CY116878 | CY116924 | CY116970 | CY117016 | CY117062 | CY117108 | CY117154 | CY117200 |
| CY116833 | CY116879 | CY116925 | CY116971 | CY117017 | CY117063 | CY117109 | CY117155 | CY117201 |
| CY116834 | CY116880 | CY116926 | CY116972 | CY117018 | CY117064 | CY117110 | CY117156 | CY117202 |
| CY116835 | CY116881 | CY116927 | CY116973 | CY117019 | CY117065 | CY117111 | CY117157 | CY117203 |
| CY116836 | CY116882 | CY116928 | CY116974 | CY117020 | CY117066 | CY117112 | CY117158 | CY117204 |
| CY116837 | CY116883 | CY116929 | CY116975 | CY117021 | CY117067 | CY117113 | CY117159 | CY117205 |
| CY116838 | CY116884 | CY116930 | CY116976 | CY117022 | CY117068 | CY117114 | CY117160 | CY117206 |
| CY116839 | CY116885 | CY116931 | CY116977 | CY117023 | CY117069 | CY117115 | CY117161 | CY117207 |
| CY116840 | CY116886 | CY116932 | CY116978 | CY117024 | CY117070 | CY117116 | CY117162 | CY117208 |
| CY116841 | CY116887 | CY116933 | CY116979 | CY117025 | CY117071 | CY117117 | CY117163 | CY117209 |

|          |          |          |          |          |          |          |          |          |
|----------|----------|----------|----------|----------|----------|----------|----------|----------|
| CY117210 | CY117256 | CY117302 | CY117348 | CY117394 | CY117440 | CY117486 | CY117532 | CY121280 |
| CY117211 | CY117257 | CY117303 | CY117349 | CY117395 | CY117441 | CY117487 | CY117533 | CY121281 |
| CY117212 | CY117258 | CY117304 | CY117350 | CY117396 | CY117442 | CY117488 | CY117534 | CY121282 |
| CY117213 | CY117259 | CY117305 | CY117351 | CY117397 | CY117443 | CY117489 | CY117535 | CY121283 |
| CY117214 | CY117260 | CY117306 | CY117352 | CY117398 | CY117444 | CY117490 | CY117536 | CY121284 |
| CY117215 | CY117261 | CY117307 | CY117353 | CY117399 | CY117445 | CY117491 | CY117537 | CY121879 |
| CY117216 | CY117262 | CY117308 | CY117354 | CY117400 | CY117446 | CY117492 | CY117538 | CY121881 |
| CY117217 | CY117263 | CY117309 | CY117355 | CY117401 | CY117447 | CY117493 | CY117539 | CY121882 |
| CY117218 | CY117264 | CY117310 | CY117356 | CY117402 | CY117448 | CY117494 | CY117540 | CY121883 |
| CY117219 | CY117265 | CY117311 | CY117357 | CY117403 | CY117449 | CY117495 | CY117541 | CY121884 |
| CY117220 | CY117266 | CY117312 | CY117358 | CY117404 | CY117450 | CY117496 | CY117542 | CY121885 |
| CY117221 | CY117267 | CY117313 | CY117359 | CY117405 | CY117451 | CY117497 | CY117543 | CY121897 |
| CY117222 | CY117268 | CY117314 | CY117360 | CY117406 | CY117452 | CY117498 | CY117544 | CY121898 |
| CY117223 | CY117269 | CY117315 | CY117361 | CY117407 | CY117453 | CY117499 | CY117545 | CY121899 |
| CY117224 | CY117270 | CY117316 | CY117362 | CY117408 | CY117454 | CY117500 | CY117546 | CY121900 |
| CY117225 | CY117271 | CY117317 | CY117363 | CY117409 | CY117455 | CY117501 | CY117547 | CY121901 |
| CY117226 | CY117272 | CY117318 | CY117364 | CY117410 | CY117456 | CY117502 | CY117548 | CY121902 |
| CY117227 | CY117273 | CY117319 | CY117365 | CY117411 | CY117457 | CY117503 | CY117549 | CY121903 |
| CY117228 | CY117274 | CY117320 | CY117366 | CY117412 | CY117458 | CY117504 | CY117550 | CY121904 |
| CY117229 | CY117275 | CY117321 | CY117367 | CY117413 | CY117459 | CY117505 | CY117551 | CY121905 |
| CY117230 | CY117276 | CY117322 | CY117368 | CY117414 | CY117460 | CY117506 | CY117552 | CY121906 |
| CY117231 | CY117277 | CY117323 | CY117369 | CY117415 | CY117461 | CY117507 | CY117553 | CY121907 |
| CY117232 | CY117278 | CY117324 | CY117370 | CY117416 | CY117462 | CY117508 | CY117554 | CY121908 |
| CY117233 | CY117279 | CY117325 | CY117371 | CY117417 | CY117463 | CY117509 | CY117555 | CY121909 |
| CY117234 | CY117280 | CY117326 | CY117372 | CY117418 | CY117464 | CY117510 | CY117556 | CY121910 |
| CY117235 | CY117281 | CY117327 | CY117373 | CY117419 | CY117465 | CY117511 | CY120589 | CY121911 |
| CY117236 | CY117282 | CY117328 | CY117374 | CY117420 | CY117466 | CY117512 | CY120629 | CY121912 |
| CY117237 | CY117283 | CY117329 | CY117375 | CY117421 | CY117467 | CY117513 | CY120637 | CY121913 |
| CY117238 | CY117284 | CY117330 | CY117376 | CY117422 | CY117468 | CY117514 | CY120709 | CY121914 |
| CY117239 | CY117285 | CY117331 | CY117377 | CY117423 | CY117469 | CY117515 | CY121001 | CY121915 |
| CY117240 | CY117286 | CY117332 | CY117378 | CY117424 | CY117470 | CY117516 | CY121003 | CY121916 |
| CY117241 | CY117287 | CY117333 | CY117379 | CY117425 | CY117471 | CY117517 | CY121004 | CY121917 |
| CY117242 | CY117288 | CY117334 | CY117380 | CY117426 | CY117472 | CY117518 | CY121005 | CY121918 |
| CY117243 | CY117289 | CY117335 | CY117381 | CY117427 | CY117473 | CY117519 | CY121025 | CY121919 |
| CY117244 | CY117290 | CY117336 | CY117382 | CY117428 | CY117474 | CY117520 | CY121027 | CY121920 |
| CY117245 | CY117291 | CY117337 | CY117383 | CY117429 | CY117475 | CY117521 | CY121028 | CY121921 |
| CY117246 | CY117292 | CY117338 | CY117384 | CY117430 | CY117476 | CY117522 | CY121029 | CY121922 |
| CY117247 | CY117293 | CY117339 | CY117385 | CY117431 | CY117477 | CY117523 | CY121030 | CY121923 |
| CY117248 | CY117294 | CY117340 | CY117386 | CY117432 | CY117478 | CY117524 | CY121031 | CY121924 |
| CY117249 | CY117295 | CY117341 | CY117387 | CY117433 | CY117479 | CY117525 | CY121126 | CY121925 |
| CY117250 | CY117296 | CY117342 | CY117388 | CY117434 | CY117480 | CY117526 | CY121128 | CY121926 |
| CY117251 | CY117297 | CY117343 | CY117389 | CY117435 | CY117481 | CY117527 | CY121129 | CY121927 |
| CY117252 | CY117298 | CY117344 | CY117390 | CY117436 | CY117482 | CY117528 | CY121130 | CY121928 |
| CY117253 | CY117299 | CY117345 | CY117391 | CY117437 | CY117483 | CY117529 | CY121131 | CY121929 |
| CY117254 | CY117300 | CY117346 | CY117392 | CY117438 | CY117484 | CY117530 | CY121132 | CY121930 |
| CY117255 | CY117301 | CY117347 | CY117393 | CY117439 | CY117485 | CY117531 | CY121278 | CY121931 |

|          |          |          |          |          |          |          |          |          |
|----------|----------|----------|----------|----------|----------|----------|----------|----------|
| CY121932 | CY121978 | CY122024 | CY122074 | CY122120 | CY122166 | CY122212 | CY122258 | CY122304 |
| CY121933 | CY121979 | CY122025 | CY122075 | CY122121 | CY122167 | CY122213 | CY122259 | CY122305 |
| CY121934 | CY121980 | CY122026 | CY122076 | CY122122 | CY122168 | CY122214 | CY122260 | CY122306 |
| CY121935 | CY121981 | CY122027 | CY122077 | CY122123 | CY122169 | CY122215 | CY122261 | CY122307 |
| CY121936 | CY121982 | CY122028 | CY122078 | CY122124 | CY122170 | CY122216 | CY122262 | CY122308 |
| CY121937 | CY121983 | CY122029 | CY122079 | CY122125 | CY122171 | CY122217 | CY122263 | CY122309 |
| CY121938 | CY121984 | CY122030 | CY122080 | CY122126 | CY122172 | CY122218 | CY122264 | CY122310 |
| CY121939 | CY121985 | CY122031 | CY122081 | CY122127 | CY122173 | CY122219 | CY122265 | CY122311 |
| CY121940 | CY121986 | CY122032 | CY122082 | CY122128 | CY122174 | CY122220 | CY122266 | CY122312 |
| CY121941 | CY121987 | CY122033 | CY122083 | CY122129 | CY122175 | CY122221 | CY122267 | CY122313 |
| CY121942 | CY121988 | CY122034 | CY122084 | CY122130 | CY122176 | CY122222 | CY122268 | CY122314 |
| CY121943 | CY121989 | CY122035 | CY122085 | CY122131 | CY122177 | CY122223 | CY122269 | CY122315 |
| CY121944 | CY121990 | CY122036 | CY122086 | CY122132 | CY122178 | CY122224 | CY122270 | CY125101 |
| CY121945 | CY121991 | CY122037 | CY122087 | CY122133 | CY122179 | CY122225 | CY122271 | CY125103 |
| CY121946 | CY121992 | CY122038 | CY122088 | CY122134 | CY122180 | CY122226 | CY122272 | CY125104 |
| CY121947 | CY121993 | CY122039 | CY122089 | CY122135 | CY122181 | CY122227 | CY122273 | CY125105 |
| CY121948 | CY121994 | CY122040 | CY122090 | CY122136 | CY122182 | CY122228 | CY122274 | CY125106 |
| CY121949 | CY121995 | CY122041 | CY122091 | CY122137 | CY122183 | CY122229 | CY122275 | CY125107 |
| CY121950 | CY121996 | CY122042 | CY122092 | CY122138 | CY122184 | CY122230 | CY122276 | CY125583 |
| CY121951 | CY121997 | CY122043 | CY122093 | CY122139 | CY122185 | CY122231 | CY122277 | CY125752 |
| CY121952 | CY121998 | CY122044 | CY122094 | CY122140 | CY122186 | CY122232 | CY122278 | CY125760 |
| CY121953 | CY121999 | CY122045 | CY122095 | CY122141 | CY122187 | CY122233 | CY122279 | CY125822 |
| CY121954 | CY122000 | CY122046 | CY122096 | CY122142 | CY122188 | CY122234 | CY122280 | CY125823 |
| CY121955 | CY122001 | CY122047 | CY122097 | CY122143 | CY122189 | CY122235 | CY122281 | CY125824 |
| CY121956 | CY122002 | CY122048 | CY122098 | CY122144 | CY122190 | CY122236 | CY122282 | CY125825 |
| CY121957 | CY122003 | CY122049 | CY122099 | CY122145 | CY122191 | CY122237 | CY122283 | CY125826 |
| CY121958 | CY122004 | CY122050 | CY122100 | CY122146 | CY122192 | CY122238 | CY122284 | CY125827 |
| CY121959 | CY122005 | CY122051 | CY122101 | CY122147 | CY122193 | CY122239 | CY122285 | CY125828 |
| CY121960 | CY122006 | CY122056 | CY122102 | CY122148 | CY122194 | CY122240 | CY122286 | CY125829 |
| CY121961 | CY122007 | CY122057 | CY122103 | CY122149 | CY122195 | CY122241 | CY122287 | CY125830 |
| CY121962 | CY122008 | CY122058 | CY122104 | CY122150 | CY122196 | CY122242 | CY122288 | CY125831 |
| CY121963 | CY122009 | CY122059 | CY122105 | CY122151 | CY122197 | CY122243 | CY122289 | CY125832 |
| CY121964 | CY122010 | CY122060 | CY122106 | CY122152 | CY122198 | CY122244 | CY122290 | CY125833 |
| CY121965 | CY122011 | CY122061 | CY122107 | CY122153 | CY122199 | CY122245 | CY122291 | CY125834 |
| CY121966 | CY122012 | CY122062 | CY122108 | CY122154 | CY122200 | CY122246 | CY122292 | CY125835 |
| CY121967 | CY122013 | CY122063 | CY122109 | CY122155 | CY122201 | CY122247 | CY122293 | CY125836 |
| CY121968 | CY122014 | CY122064 | CY122110 | CY122156 | CY122202 | CY122248 | CY122294 | CY125837 |
| CY121969 | CY122015 | CY122065 | CY122111 | CY122157 | CY122203 | CY122249 | CY122295 | CY125838 |
| CY121970 | CY122016 | CY122066 | CY122112 | CY122158 | CY122204 | CY122250 | CY122296 | CY125839 |
| CY121971 | CY122017 | CY122067 | CY122113 | CY122159 | CY122205 | CY122251 | CY122297 | CY125840 |
| CY121972 | CY122018 | CY122068 | CY122114 | CY122160 | CY122206 | CY122252 | CY122298 | CY125841 |
| CY121973 | CY122019 | CY122069 | CY122115 | CY122161 | CY122207 | CY122253 | CY122299 | CY125842 |
| CY121974 | CY122020 | CY122070 | CY122116 | CY122162 | CY122208 | CY122254 | CY122300 | CY125843 |
| CY121975 | CY122021 | CY122071 | CY122117 | CY122163 | CY122209 | CY122255 | CY122301 | CY125844 |
| CY121976 | CY122022 | CY122072 | CY122118 | CY122164 | CY122210 | CY122256 | CY122302 | CY125845 |
| CY121977 | CY122023 | CY122073 | CY122119 | CY122165 | CY122211 | CY122257 | CY122303 | CY125846 |

|          |          |          |          |          |          |          |          |          |
|----------|----------|----------|----------|----------|----------|----------|----------|----------|
| CY125847 | CY125893 | CY126922 | CY130055 | CY132691 | CY136712 | CY145625 | CY163694 | CY163876 |
| CY125848 | CY125894 | CY127058 | CY130056 | CY132699 | CY136808 | CY145657 | CY163695 | CY163877 |
| CY125849 | CY125895 | CY127171 | CY130057 | CY132861 | CY136834 | CY145673 | CY163697 | CY163878 |
| CY125850 | CY125896 | CY127179 | CY130058 | CY132927 | CY136882 | CY145721 | CY163699 | CY163879 |
| CY125851 | CY125897 | CY127187 | CY130059 | CY132935 | CY136922 | CY145745 | CY163700 | CY163881 |
| CY125852 | CY125898 | CY127271 | CY130060 | CY133007 | CY136930 | CY145753 | CY163701 | CY163883 |
| CY125853 | CY125899 | CY127343 | CY130061 | CY133015 | CY138139 | CY145769 | CY163702 | CY163884 |
| CY125854 | CY125900 | CY127351 | CY130063 | CY133071 | CY138314 | CY146507 | CY163703 | CY163885 |
| CY125855 | CY125901 | CY127359 | CY130065 | CY133095 | CY139329 | CY146515 | CY163705 | CY163886 |
| CY125856 | CY125902 | CY127367 | CY130066 | CY133103 | CY139675 | CY146531 | CY163707 | CY163887 |
| CY125857 | CY125903 | CY127375 | CY130067 | CY133155 | CY139691 | CY146574 | CY163708 | CY163889 |
| CY125858 | CY125904 | CY127383 | CY130068 | CY133195 | CY139731 | CY146654 | CY163709 | CY163891 |
| CY125859 | CY125905 | CY127391 | CY130069 | CY133236 | CY139763 | CY146662 | CY163710 | CY163892 |
| CY125860 | CY125906 | CY127455 | CY130087 | CY133244 | CY139815 | CY146670 | CY163711 | CY163893 |
| CY125861 | CY125907 | CY127463 | CY130089 | CY133252 | CY139855 | CY146678 | CY163713 | CY163894 |
| CY125862 | CY125908 | CY127471 | CY130090 | CY133260 | CY139979 | CY146899 | CY163715 | CY163895 |
| CY125863 | CY125909 | CY127479 | CY130091 | CY133284 | CY140182 | CY149350 | CY163716 | CY163897 |
| CY125864 | CY125910 | CY127487 | CY130092 | CY133292 | CY140485 | CY149766 | CY163717 | CY163899 |
| CY125865 | CY125911 | CY127503 | CY130093 | CY133308 | CY140521 | CY163649 | CY163718 | CY163900 |
| CY125866 | CY125912 | CY127511 | CY130127 | CY133334 | CY140545 | CY163651 | CY163719 | CY163901 |
| CY125867 | CY125913 | CY127519 | CY130129 | CY133375 | CY140561 | CY163652 | CY163721 | CY163902 |
| CY125868 | CY125914 | CY127538 | CY130130 | CY133434 | CY140585 | CY163653 | CY163723 | CY163903 |
| CY125869 | CY125915 | CY127546 | CY130131 | CY133442 | CY140609 | CY163654 | CY163724 | CY163905 |
| CY125870 | CY125916 | CY127554 | CY130132 | CY133450 | CY140633 | CY163655 | CY163725 | CY163907 |
| CY125871 | CY125917 | CY127648 | CY130133 | CY133458 | CY140814 | CY163657 | CY163726 | CY163908 |
| CY125872 | CY125918 | CY127656 | CY130151 | CY133507 | CY140913 | CY163659 | CY163727 | CY163909 |
| CY125873 | CY125919 | CY127664 | CY130153 | CY133515 | CY140995 | CY163660 | CY163729 | CY163910 |
| CY125874 | CY125920 | CY127793 | CY130154 | CY133523 | CY141067 | CY163661 | CY163731 | CY163911 |
| CY125875 | CY125921 | CY127833 | CY130155 | CY133531 | CY141170 | CY163662 | CY163732 | CY163913 |
| CY125876 | CY125922 | CY127897 | CY130156 | CY133603 | CY144212 | CY163663 | CY163733 | CY163915 |
| CY125877 | CY125923 | CY129064 | CY130157 | CY133635 | CY144220 | CY163665 | CY163734 | CY163916 |
| CY125878 | CY125924 | CY129215 | CY130455 | CY133803 | CY144246 | CY163667 | CY163735 | CY163917 |
| CY125879 | CY125925 | CY130000 | CY132095 | CY133811 | CY144278 | CY163668 | CY163737 | CY163918 |
| CY125880 | CY126234 | CY130032 | CY132103 | CY133903 | CY144286 | CY163669 | CY163739 | CY163919 |
| CY125881 | CY126274 | CY130039 | CY132111 | CY133911 | CY144359 | CY163670 | CY163740 | CY163921 |
| CY125882 | CY126356 | CY130041 | CY132127 | CY134175 | CY144485 | CY163671 | CY163741 | CY163923 |
| CY125883 | CY126363 | CY130042 | CY132183 | CY134297 | CY144509 | CY163681 | CY163742 | CY163924 |
| CY125884 | CY126378 | CY130043 | CY132271 | CY134393 | CY144573 | CY163683 | CY163743 | CY163925 |
| CY125885 | CY126386 | CY130044 | CY132303 | CY136648 | CY144701 | CY163684 | CY163745 | CY163926 |
| CY125886 | CY126395 | CY130045 | CY132455 | CY136656 | CY144781 | CY163685 | CY163747 | CY163927 |
| CY125887 | CY126406 | CY130047 | CY132463 | CY136664 | CY145154 | CY163686 | CY163748 | CY163929 |
| CY125888 | CY126770 | CY130049 | CY132471 | CY136672 | CY145187 | CY163687 | CY163749 | CY163931 |
| CY125889 | CY126778 | CY130050 | CY132479 | CY136680 | CY145195 | CY163689 | CY163750 | CY163932 |
| CY125890 | CY126786 | CY130051 | CY132487 | CY136688 | CY145219 | CY163691 | CY163751 | CY163933 |
| CY125891 | CY126794 | CY130052 | CY132567 | CY136696 | CY145259 | CY163692 | CY163873 | CY163934 |
| CY125892 | CY126802 | CY130053 | CY132683 | CY136704 | CY145495 | CY163693 | CY163875 | CY163935 |

|          |          |          |          |          |          |          |          |          |
|----------|----------|----------|----------|----------|----------|----------|----------|----------|
| CY163937 | CY163998 | CY164060 | CY178720 | DQ017510 | DQ064423 | DQ064481 | DQ064543 | DQ116071 |
| CY163939 | CY163999 | CY164061 | CY178722 | DQ017511 | DQ064424 | DQ064483 | DQ064544 | DQ116072 |
| CY163940 | CY164001 | CY164062 | CY178723 | DQ017512 | DQ064425 | DQ064485 | DQ064545 | DQ116073 |
| CY163941 | CY164003 | CY164063 | CY178724 | DQ017514 | DQ064426 | DQ064486 | DQ064546 | DQ116074 |
| CY163942 | CY164004 | CY164065 | CY178725 | DQ017516 | DQ064427 | DQ064487 | DQ064550 | DQ116075 |
| CY163943 | CY164005 | CY164067 | CY178726 | DQ017517 | DQ064428 | DQ064488 | DQ064551 | DQ116076 |
| CY163945 | CY164006 | CY164068 | D00050   | DQ021563 | DQ064429 | DQ064489 | DQ064554 | DQ116077 |
| CY163947 | CY164007 | CY164069 | D00051   | DQ021571 | DQ064430 | DQ064490 | DQ064555 | DQ116078 |
| CY163948 | CY164009 | CY164070 | D00599   | DQ021601 | DQ064431 | DQ064491 | DQ064556 | DQ116079 |
| CY163949 | CY164011 | CY164071 | D00600   | DQ021716 | DQ064432 | DQ064492 | DQ064557 | DQ116080 |
| CY163950 | CY164012 | CY164073 | D00603   | DQ021725 | DQ064433 | DQ064496 | DQ064558 | DQ116081 |
| CY163951 | CY164013 | CY164075 | D13579   | DQ064381 | DQ064434 | DQ064497 | DQ064559 | DQ116082 |
| CY163953 | CY164014 | CY164076 | D13580   | DQ064382 | DQ064435 | DQ064500 | DQ064560 | DQ116083 |
| CY163955 | CY164015 | CY164077 | D21184   | DQ064383 | DQ064436 | DQ064501 | DQ064561 | DQ116084 |
| CY163956 | CY164017 | CY164078 | D21185   | DQ064384 | DQ064437 | DQ064502 | DQ064562 | DQ116085 |
| CY163957 | CY164019 | CY164079 | D30667   | DQ064388 | DQ064438 | DQ064503 | DQ064564 | DQ116086 |
| CY163958 | CY164020 | CY164081 | DQ000239 | DQ064389 | DQ064442 | DQ064504 | DQ064566 | DQ139322 |
| CY163959 | CY164021 | CY164083 | DQ009917 | DQ064392 | DQ064443 | DQ064505 | DQ064567 | DQ139323 |
| CY163961 | CY164022 | CY164084 | DQ009919 | DQ064393 | DQ064446 | DQ064506 | DQ064568 | DQ139324 |
| CY163963 | CY164023 | CY164085 | DQ009920 | DQ064394 | DQ064447 | DQ064507 | DQ064569 | DQ139325 |
| CY163964 | CY164025 | CY164086 | DQ009921 | DQ064395 | DQ064448 | DQ064508 | DQ067437 | DQ139326 |
| CY163965 | CY164027 | CY164087 | DQ009922 | DQ064396 | DQ064449 | DQ064510 | DQ067438 | DQ139327 |
| CY163966 | CY164028 | CY164089 | DQ009923 | DQ064397 | DQ064450 | DQ064512 | DQ067439 | DQ150422 |
| CY163967 | CY164029 | CY164091 | DQ009924 | DQ064398 | DQ064451 | DQ064513 | DQ067440 | DQ150423 |
| CY163969 | CY164030 | CY164092 | DQ017486 | DQ064399 | DQ064452 | DQ064514 | DQ067441 | DQ150424 |
| CY163971 | CY164031 | CY164093 | DQ017487 | DQ064400 | DQ064453 | DQ064515 | DQ067442 | DQ150426 |
| CY163972 | CY164033 | CY164094 | DQ017488 | DQ064402 | DQ064454 | DQ064516 | DQ067443 | DQ150428 |
| CY163973 | CY164035 | CY164095 | DQ017489 | DQ064404 | DQ064456 | DQ064517 | DQ080994 | DQ150429 |
| CY163974 | CY164036 | CY164097 | DQ017490 | DQ064405 | DQ064458 | DQ064518 | DQ090051 | DQ150430 |
| CY163975 | CY164037 | CY164099 | DQ017491 | DQ064406 | DQ064459 | DQ064519 | DQ092870 | DQ150431 |
| CY163977 | CY164038 | CY164100 | DQ017492 | DQ064407 | DQ064460 | DQ064523 | DQ104702 | DQ150432 |
| CY163979 | CY164039 | CY164101 | DQ017493 | DQ064408 | DQ064461 | DQ064524 | DQ104703 | DQ150434 |
| CY163980 | CY164041 | CY164102 | DQ017494 | DQ064409 | DQ064462 | DQ064527 | DQ116057 | DQ150436 |
| CY163981 | CY164043 | CY164103 | DQ017495 | DQ064410 | DQ064463 | DQ064528 | DQ116058 | DQ150437 |
| CY163982 | CY164044 | CY164105 | DQ017496 | DQ064411 | DQ064464 | DQ064529 | DQ116059 | DQ226129 |
| CY163983 | CY164045 | CY164107 | DQ017497 | DQ064412 | DQ064465 | DQ064530 | DQ116060 | DQ226130 |
| CY163985 | CY164046 | CY164108 | DQ017498 | DQ064413 | DQ064469 | DQ064531 | DQ116061 | DQ226131 |
| CY163987 | CY164047 | CY164109 | DQ017499 | DQ064414 | DQ064470 | DQ064532 | DQ116062 | DQ226132 |
| CY163988 | CY164049 | CY164110 | DQ017500 | DQ064415 | DQ064473 | DQ064533 | DQ116063 | DQ226133 |
| CY163989 | CY164051 | CY164111 | DQ017501 | DQ064416 | DQ064474 | DQ064534 | DQ116064 | DQ226134 |
| CY163990 | CY164052 | CY164113 | DQ017502 | DQ064417 | DQ064475 | DQ064535 | DQ116065 | DQ226135 |
| CY163991 | CY164053 | CY164115 | DQ017505 | DQ064418 | DQ064476 | DQ064537 | DQ116066 | DQ226136 |
| CY163993 | CY164054 | CY164116 | DQ017506 | DQ064419 | DQ064477 | DQ064539 | DQ116067 | DQ226137 |
| CY163995 | CY164055 | CY164117 | DQ017507 | DQ064420 | DQ064478 | DQ064540 | DQ116068 | DQ226138 |
| CY163996 | CY164057 | CY164118 | DQ017508 | DQ064421 | DQ064479 | DQ064541 | DQ116069 | DQ227353 |
| CY163997 | CY164059 | CY164119 | DQ017509 | DQ064422 | DQ064480 | DQ064542 | DQ116070 | DQ251448 |

|          |           |           |          |          |          |          |          |          |
|----------|-----------|-----------|----------|----------|----------|----------|----------|----------|
| DQ256385 | DQ366329  | DQ376874  | DQ464357 | DQ486029 | DQ508881 | DQ914815 | DQ997185 | DQ997535 |
| DQ280197 | DQ366331  | DQ376878  | DQ464358 | DQ487327 | DQ508882 | DQ914817 | DQ997186 | DQ997536 |
| DQ280198 | DQ366333  | DQ376880* | DQ464359 | DQ487328 | DQ508884 | DQ914818 | DQ997188 | EF044307 |
| DQ280199 | DQ366334  | DQ376884  | DQ464360 | DQ487329 | DQ508885 | DQ985168 | DQ997251 | EF063517 |
| DQ280200 | DQ376656  | DQ376894* | DQ464361 | DQ487330 | DQ508894 | DQ989966 | DQ997252 | EF063518 |
| DQ280201 | DQ376658  | DQ376897* | DQ465402 | DQ487332 | DQ508895 | DQ989967 | DQ997255 | EF063519 |
| DQ280204 | DQ376662  | DQ376901  | DQ469955 | DQ487333 | DQ508896 | DQ989968 | DQ997256 | EF063520 |
| DQ280229 | DQ376664* | DQ376902* | DQ469956 | DQ487334 | DQ508898 | DQ989970 | DQ997257 | EF063521 |
| DQ280230 | DQ376667  | DQ376905* | DQ469957 | DQ487335 | DQ508900 | DQ989972 | DQ997258 | EF063522 |
| DQ280231 | DQ376674* | DQ390209  | DQ469958 | DQ487336 | DQ508901 | DQ989973 | DQ997275 | EF063523 |
| DQ280232 | DQ376680* | DQ402042  | DQ469959 | DQ487338 | DQ508926 | DQ989974 | DQ997278 | EF070734 |
| DQ280233 | DQ376685  | DQ408511  | DQ469961 | DQ487339 | DQ508927 | DQ989975 | DQ997279 | EF070735 |
| DQ280234 | DQ376686* | DQ408526  | DQ469963 | DQ508830 | DQ508928 | DQ989976 | DQ997280 | EF070736 |
| DQ299830 | DQ376689* | DQ415283  | DQ469964 | DQ508831 | DQ508930 | DQ989977 | DQ997281 | EF070737 |
| DQ299831 | DQ376721  | DQ415284  | DQ469965 | DQ508832 | DQ508932 | DQ989978 | DQ997282 | EF070738 |
| DQ299832 | DQ376728  | DQ415288  | DQ469966 | DQ508834 | DQ508933 | DQ989980 | DQ997401 | EF070739 |
| DQ299833 | DQ376730  | DQ415290  | DQ469967 | DQ508836 | DQ681205 | DQ989982 | DQ997402 | EF070740 |
| DQ299834 | DQ376734  | DQ415293  | DQ469969 | DQ508837 | DQ681209 | DQ989983 | DQ997403 | EF078977 |
| DQ299835 | DQ376740  | DQ415294  | DQ469979 | DQ508838 | DQ681213 | DQ989992 | DQ997404 | EF112200 |
| DQ299839 | DQ376758  | DQ415295  | DQ469980 | DQ508839 | DQ681217 | DQ989993 | DQ997407 | EF112224 |
| DQ299847 | DQ376764  | DQ415299  | DQ469981 | DQ508840 | DQ683026 | DQ989994 | DQ997408 | EF112248 |
| DQ299855 | DQ376766  | DQ415301  | DQ469982 | DQ508841 | DQ683027 | DQ989996 | DQ997409 | EF112294 |
| DQ299863 | DQ376770  | DQ415304  | DQ469983 | DQ508842 | DQ683031 | DQ989998 | DQ997412 | EF112346 |
| DQ309439 | DQ376776  | DQ415305  | DQ469985 | DQ508844 | DQ683033 | DQ989999 | DQ997413 | EF112370 |
| DQ335773 | DQ376794  | DQ415306  | DQ469987 | DQ508845 | DQ683037 | DQ991301 | DQ997414 | EF155053 |
| DQ347957 | DQ376800  | DQ415310  | DQ469988 | DQ508846 | DQ683045 | DQ991302 | DQ997415 | EF155054 |
| DQ351858 | DQ376802  | DQ415312  | DQ469989 | DQ508847 | DQ683047 | DQ991303 | DQ997416 | EF155055 |
| DQ351859 | DQ376806  | DQ415315  | DQ469990 | DQ508848 | DQ822192 | DQ991305 | DQ997441 | EF155056 |
| DQ351862 | DQ376808* | DQ415327  | DQ469991 | DQ508850 | DQ835310 | DQ991307 | DQ997452 | EF155057 |
| DQ351863 | DQ376812  | DQ415328  | DQ469993 | DQ508852 | DQ835311 | DQ991308 | DQ997461 | EF155058 |
| DQ351864 | DQ376822* | DQ415332  | DQ469995 | DQ508853 | DQ835312 | DQ991309 | DQ997468 | EF155059 |
| DQ351865 | DQ376825* | DQ415334  | DQ469996 | DQ508854 | DQ835314 | DQ991310 | DQ997477 | EF155060 |
| DQ351868 | DQ376829* | DQ415337  | DQ469997 | DQ508855 | DQ835316 | DQ991311 | DQ997482 | EF155061 |
| DQ351869 | DQ376830  | DQ415349  | DQ469998 | DQ508856 | DQ835317 | DQ991313 | DQ997491 | EF155062 |
| DQ351870 | DQ376833* | DQ415350  | DQ469999 | DQ508858 | DQ849013 | DQ991315 | DQ997499 | EF155063 |
| DQ351871 | DQ376836  | DQ415354  | DQ470000 | DQ508860 | DQ849021 | DQ991316 | DQ997506 | EF155064 |
| DQ351874 | DQ376838  | DQ415356  | DQ470001 | DQ508861 | DQ874395 | DQ997116 | DQ997515 | EF155065 |
| DQ351875 | DQ376842  | DQ415359  | DQ485205 | DQ508862 | DQ889682 | DQ997117 | DQ997516 | EF155066 |
| DQ360837 | DQ376844* | DQ415360  | DQ485206 | DQ508863 | DQ889683 | DQ997118 | DQ997517 | EF155067 |
| DQ360838 | DQ376848  | DQ415361  | DQ485207 | DQ508864 | DQ889684 | DQ997119 | DQ997518 | EF155068 |
| DQ360839 | DQ376858* | DQ415365  | DQ485209 | DQ508866 | DQ889685 | DQ997120 | DQ997519 | EF155069 |
| DQ360840 | DQ376861* | DQ415367  | DQ485210 | DQ508868 | DQ889686 | DQ997121 | DQ997520 | EF155070 |
| DQ360841 | DQ376865* | DQ415370  | DQ485211 | DQ508869 | DQ889688 | DQ997179 | DQ997529 | EF155071 |
| DQ360842 | DQ376866  | DQ432693  | DQ485212 | DQ508878 | DQ914811 | DQ997180 | DQ997530 | EF155072 |
| DQ366327 | DQ376869* | DQ464353  | DQ485218 | DQ508879 | DQ914812 | DQ997181 | DQ997533 | EF155073 |
| DQ366328 | DQ376872  | DQ464356  | DQ485226 | DQ508880 | DQ914813 | DQ997184 | DQ997534 | EF155074 |

|          |          |          |          |           |          |          |          |          |
|----------|----------|----------|----------|-----------|----------|----------|----------|----------|
| EF155075 | EF155121 | EF462509 | EF492284 | EF551051  | EU015989 | EU086227 | EU097828 | EU216098 |
| EF155076 | EF155122 | EF462510 | EF492285 | EF551052  | EU015990 | EU086228 | EU097833 | EU216099 |
| EF155077 | EF155123 | EF462511 | EF492286 | EF551054  | EU015991 | EU086229 | EU097859 | EU216100 |
| EF155078 | EF155124 | EF462512 | EF492287 | EF551056  | EU015992 | EU086230 | EU097866 | EU216101 |
| EF155079 | EF155125 | EF462513 | EF492288 | EF551057  | EU015993 | EU086231 | EU097893 | EU216102 |
| EF155080 | EF205162 | EF462514 | EF492289 | EF591751  | EU030973 | EU086232 | EU097899 | EU216103 |
| EF155081 | EF205163 | EF462515 | EF492290 | EF591759  | EU030974 | EU086233 | EU097929 | EU216104 |
| EF155082 | EF205164 | EF462516 | EF492291 | EF592497  | EU030975 | EU086236 | EU097932 | EU216105 |
| EF155083 | EF205166 | EF462517 | EF492292 | EF597303  | EU030977 | EU086238 | EU100611 | EU216106 |
| EF155084 | EF205167 | EF462518 | EF492293 | EF597304  | EU030979 | EU086239 | EU116037 | EU239829 |
| EF155085 | EF205176 | EF462519 | EF492294 | EF597305  | EU030980 | EU086240 | EU116038 | EU239830 |
| EF155086 | EF205177 | EF462520 | EF492295 | EF597306  | EU050078 | EU086241 | EU116039 | EU253562 |
| EF155087 | EF205178 | EF462521 | EF492296 | EF597307  | EU050081 | EU086242 | EU116041 | EU258935 |
| EF155088 | EF205180 | EF462522 | EF492297 | EF597308  | EU050084 | EU086243 | EU116043 | EU258936 |
| EF155089 | EF205181 | EF462523 | EF492298 | EF597309  | EU050086 | EU086244 | EU116044 | EU258938 |
| EF155090 | EF205183 | EF462524 | EF492299 | EF597310  | EU050090 | EU086249 | EU152234 | EU258939 |
| EF155091 | EF205184 | EF462525 | EF492300 | EF597311  | EU050094 | EU086250 | EU152235 | EU258940 |
| EF155092 | EF205185 | EF467817 | EF492301 | EF620020  | EU050096 | EU086270 | EU152236 | EU258941 |
| EF155093 | EF205187 | EF467818 | EF492304 | EF620902  | EU050123 | EU086271 | EU152238 | EU258942 |
| EF155094 | EF205188 | EF467819 | EF492310 | EF626674  | EU050124 | EU086272 | EU152239 | EU258943 |
| EF155095 | EF205190 | EF467820 | EF492314 | EF626675  | EU050126 | EU086285 | EU152240 | EU258944 |
| EF155096 | EF205191 | EF467822 | EF492320 | EF626676  | EU050152 | EU086287 | EU152241 | EU258946 |
| EF155097 | EF205192 | EF467824 | EF492328 | EF626677  | EU050162 | EU086288 | EU157928 | EU258947 |
| EF155098 | EF205194 | EF474443 | EF492330 | EF626678  | EU050163 | EU086289 | EU163429 | EU258948 |
| EF155099 | EF205195 | EF474444 | EF492344 | EF626679  | EU050165 | EU086292 | EU163430 | EU258949 |
| EF155100 | EF205197 | EF474445 | EF492350 | EF626680  | EU050166 | EU086294 | EU163432 | EU258950 |
| EF155101 | EF205198 | EF474446 | EF492354 | EF626681  | EU050168 | EU086297 | EU163434 | EU263342 |
| EF155102 | EF205199 | EF474447 | EF492360 | EF626682  | EU053130 | EU086299 | EU163435 | EU263343 |
| EF155103 | EF205201 | EF474449 | EF492368 | EF626683  | EU053131 | EU086307 | EU163436 | EU263344 |
| EF155104 | EF205202 | EF492246 | EF492370 | EF633437  | EU053132 | EU086320 | EU182255 | EU263346 |
| EF155105 | EF205204 | EF492258 | EF492373 | EF633438  | EU053134 | EU086325 | EU182262 | EU263348 |
| EF155106 | EF205205 | EF492266 | EF492379 | EF633439  | EU053136 | EU086327 | EU182263 | EU263349 |
| EF155107 | EF205206 | EF492268 | EF492383 | EF633440  | EU053137 | EU086329 | EU182264 | EU273778 |
| EF155108 | EF205208 | EF492270 | EF492389 | EF633441  | EU053138 | EU086330 | EU182266 | EU273779 |
| EF155109 | EF205209 | EF492272 | EF492397 | EF633442  | EU053139 | EU086332 | EU182267 | EU273786 |
| EF155110 | EF212862 | EF492273 | EF492399 | EF633443  | EU053140 | EU094470 | EU182268 | EU273787 |
| EF155111 | EF221765 | EF492274 | EF492402 | EF634334  | EU053142 | EU094471 | EU182269 | EU273790 |
| EF155112 | EF362427 | EF492275 | EF492408 | EF634342  | EU053144 | EU094472 | EU182275 | EU273791 |
| EF155113 | EF362429 | EF492276 | EF492412 | EF655837  | EU053145 | EU094474 | EU182282 | EU273794 |
| EF155114 | EF362430 | EF492277 | EF492418 | EF655839  | EU081865 | EU094475 | EU182311 | EU273795 |
| EF155115 | EF362431 | EF492278 | EF492426 | EF655840  | EU081866 | EU094476 | EU182318 | EU273798 |
| EF155116 | EF362432 | EF492279 | EF492428 | EF655841  | EU081867 | EU094477 | EU216093 | EU273799 |
| EF155117 | EF362433 | EF492280 | EF517399 | EF655842* | EU081868 | EU097767 | EU216094 | EU273802 |
| EF155118 | EF392844 | EF492281 | EF530048 | EF655843  | EU081869 | EU097768 | EU216095 | EU273803 |
| EF155119 | EF418187 | EF492282 | EF551047 | EF675617  | EU081870 | EU097791 | EU216096 | EU301274 |
| EF155120 | EF462508 | EF492283 | EF551050 | EU015988  | EU081871 | EU097801 | EU216097 | EU301275 |

|          |          |          |          |          |          |          |          |          |
|----------|----------|----------|----------|----------|----------|----------|----------|----------|
| EU301276 | EU429729 | EU434695 | EU544245 | EU672455 | EU735837 | EU743054 | EU743295 | EU871833 |
| EU301284 | EU429730 | EU434697 | EU544246 | EU672456 | EU735838 | EU743060 | EU743296 | EU871834 |
| EU301285 | EU429732 | EU434698 | EU557409 | EU672457 | EU735839 | EU743066 | EU743297 | EU871835 |
| EU301286 | EU429735 | EU434699 | EU557419 | EU672458 | EU735840 | EU743072 | EU743298 | EU871845 |
| EU301287 | EU429736 | EU434700 | EU557456 | EU672459 | EU735841 | EU743073 | EU743299 | EU871847 |
| EU301288 | EU429737 | EU434701 | EU557522 | EU676173 | EU742622 | EU743074 | EU743300 | EU871848 |
| EU301289 | EU429738 | EU478814 | EU557530 | EU678369 | EU742630 | EU743075 | EU743323 | EU871849 |
| EU301290 | EU429739 | EU500841 | EU557622 | EU678370 | EU742644 | EU743076 | EU743325 | EU871850 |
| EU301293 | EU429740 | EU500842 | EU557639 | EU678371 | EU742645 | EU743077 | EU743326 | EU871851 |
| EU301294 | EU429741 | EU500843 | EU594346 | EU678372 | EU742647 | EU743078 | EU743327 | EU871901 |
| EU301295 | EU429742 | EU500845 | EU594347 | EU678373 | EU742648 | EU743080 | EU743328 | EU874897 |
| EU301296 | EU429743 | EU500847 | EU594348 | EU678374 | EU742649 | EU743094 | EU743329 | EU874898 |
| EU301297 | EU429744 | EU500848 | EU594350 | EU678375 | EU742650 | EU743100 | EU743355 | EU874901 |
| EU301298 | EU429745 | EU500849 | EU594352 | EU678376 | EU742651 | EU743107 | EU743357 | EU874902 |
| EU301299 | EU429748 | EU500850 | EU594353 | EU678377 | EU742653 | EU743108 | EU743358 | EU874903 |
| EU301300 | EU429756 | EU500851 | EU597800 | EU697206 | EU742654 | EU743109 | EU743359 | EU874904 |
| EU301301 | EU429760 | EU500853 | EU597801 | EU697211 | EU742655 | EU743110 | EU743360 | EU880821 |
| EU301302 | EU429761 | EU500855 | EU597802 | EU735787 | EU742656 | EU743111 | EU743361 | EU880823 |
| EU301303 | EU429762 | EU500856 | EU597803 | EU735789 | EU742657 | EU743112 | EU743481 | EU880824 |
| EU340028 | EU429767 | EU502886 | EU597804 | EU735790 | EU742658 | EU743113 | EU743483 | EU880825 |
| EU346933 | EU429768 | EU502887 | EU597805 | EU735791 | EU742659 | EU743115 | EU743484 | EU880826 |
| EU346934 | EU429769 | EU502889 | EU604691 | EU735792 | EU742890 | EU743144 | EU743485 | EU880827 |
| EU346935 | EU429770 | EU502890 | EU604692 | EU735793 | EU742914 | EU743146 | EU743486 | EU882861 |
| EU346936 | EU429771 | EU502891 | EU604693 | EU735795 | EU742928 | EU743147 | EU743487 | EU909862 |
| EU346937 | EU429772 | EU502892 | EU604694 | EU735797 | EU742933 | EU743148 | EU743496 | EU909863 |
| EU346938 | EU429773 | EU502903 | EU604695 | EU735798 | EU742938 | EU743149 | EU743503 | EU909864 |
| EU346939 | EU429774 | EU502904 | EU604696 | EU735799 | EU742943 | EU743150 | EU743510 | EU909865 |
| EU346940 | EU429775 | EU502905 | EU636686 | EU735800 | EU742952 | EU743168 | EU748900 | EU909866 |
| EU346941 | EU429776 | EU502906 | EU644483 | EU735801 | EU742962 | EU743170 | EU748901 | EU909867 |
| EU365373 | EU429777 | EU502907 | EU644486 | EU735803 | EU742963 | EU743171 | EU748902 | EU909868 |
| EU399752 | EU429781 | EU502908 | EU644488 | EU735805 | EU742964 | EU743172 | EU748904 | EU909869 |
| EU399754 | EU429782 | EU516314 | EU644489 | EU735806 | EU742965 | EU743173 | EU748906 | EU909870 |
| EU399755 | EU429784 | EU516315 | EU662948 | EU735807 | EU742966 | EU743174 | EU748907 | EU909871 |
| EU399756 | EU429791 | EU516316 | EU662949 | EU735808 | EU742967 | EU743190 | EU753276 | EU909872 |
| EU399757 | EU429953 | EU516317 | EU662950 | EU735809 | EU742968 | EU743191 | EU753284 | EU909873 |
| EU399758 | EU429959 | EU516318 | EU662951 | EU735810 | EU742969 | EU743192 | EU753292 | EU909874 |
| EU429699 | EU429965 | EU516319 | EU662952 | EU735811 | EU742997 | EU743193 | EU753300 | EU909875 |
| EU429701 | EU429971 | EU518739 | EU662953 | EU735812 | EU743021 | EU743194 | EU753308 | EU909876 |
| EU429707 | EU429977 | EU518745 | EU662954 | EU735813 | EU743028 | EU743197 | EU753316 | EU909877 |
| EU429720 | EU429983 | EU518752 | EU662955 | EU735814 | EU743029 | EU743204 | EU753324 | EU909878 |
| EU429721 | EU430504 | EU518754 | EU662956 | EU735815 | EU743030 | EU743212 | EU753332 | EU909879 |
| EU429722 | EU430505 | EU532036 | EU662957 | EU735816 | EU743031 | EU743235 | EU753340 | EU909880 |
| EU429724 | EU430506 | EU532044 | EU662958 | EU735817 | EU743032 | EU743255 | EU753348 | EU912508 |
| EU429725 | EU430507 | EU532055 | EU662959 | EU735820 | EU743033 | EU743267 | EU871829 | EU912509 |
| EU429726 | EU430508 | EU532061 | EU662960 | EU735828 | EU743034 | EU743275 | EU871831 | EU914201 |
| EU429728 | EU430509 | EU544243 | EU662961 | EU735835 | EU743036 | EU743294 | EU871832 | EU924268 |



|          |          |          |          |          |          |          |          |          |
|----------|----------|----------|----------|----------|----------|----------|----------|----------|
| EU924269 | FJ357077 | FJ464618 | FJ520162 | FJ686713 | FJ686766 | FJ750569 | FR771827 | GQ247859 |
| EU924270 | FJ357078 | FJ464619 | FJ534539 | FJ686714 | FJ686767 | FJ784783 | FR771828 | GQ257383 |
| EU924272 | FJ357080 | FJ464620 | FJ534547 | FJ686715 | FJ686768 | FJ784787 | FR873768 | GQ257413 |
| EU924274 | FJ357081 | FJ464621 | FJ534549 | FJ686717 | FJ686769 | FJ784790 | FR873773 | GQ257435 |
| EU935061 | FJ357082 | FJ464622 | FJ534551 | FJ686718 | FJ686770 | FJ784799 | GQ117131 | GQ257495 |
| EU935062 | FJ357083 | FJ464623 | FJ581428 | FJ686719 | FJ686771 | FJ784803 | GQ117139 | GQ257496 |
| EU935063 | FJ357084 | FJ464624 | FJ581429 | FJ686720 | FJ686773 | FJ784806 | GQ117147 | GQ257498 |
| EU935064 | FJ357085 | FJ464625 | FJ581430 | FJ686721 | FJ686774 | FJ784815 | GQ117155 | GQ257499 |
| EU939162 | FJ357087 | FJ464626 | FJ581432 | FJ686722 | FJ686775 | FJ784819 | GQ117163 | GQ257500 |
| EU980475 | FJ357088 | FJ464627 | FJ581433 | FJ686723 | FJ686776 | FJ784822 | GQ117171 | GQ257501 |
| EU980481 | FJ357089 | FJ464628 | FJ581434 | FJ686725 | FJ686777 | FJ784831 | GQ117187 | GQ257502 |
| EU980488 | FJ357090 | FJ464629 | FJ581435 | FJ686726 | FJ686778 | FJ784835 | GQ117195 | GQ257503 |
| EU980496 | FJ357093 | FJ492964 | FJ605502 | FJ686727 | FJ686779 | FJ784838 | GQ117203 | GQ257504 |
| EU980503 | FJ357840 | FJ492965 | FJ610059 | FJ686728 | FJ686781 | FJ784863 | GQ117227 | GQ257506 |
| EU980517 | FJ374512 | FJ499464 | FJ610065 | FJ686729 | FJ686782 | FJ784867 | GQ117243 | GQ257507 |
| EU980519 | FJ374513 | FJ517260 | FJ610071 | FJ686730 | FJ686783 | FJ784870 | GQ117251 | GQ257508 |
| EU980520 | FJ374515 | FJ517262 | FJ610077 | FJ686731 | FJ686784 | FJ784879 | GQ117267 | GQ257509 |
| EU980521 | FJ374516 | FJ517263 | FJ610083 | FJ686733 | FJ686785 | FJ784883 | GQ120534 | GQ257510 |
| EU980522 | FJ374517 | FJ517264 | FJ610089 | FJ686734 | FJ686786 | FJ784886 | GQ120535 | GQ257511 |
| EU980523 | FJ374518 | FJ517265 | FJ610096 | FJ686735 | FJ686787 | FJ793286 | GQ120536 | GQ257512 |
| EU980525 | FJ384745 | FJ517266 | FJ610103 | FJ686736 | FJ686789 | FJ793294 | GQ120537 | GQ257514 |
| EU982304 | FJ384753 | FJ517267 | FJ610110 | FJ686737 | FJ686790 | FJ793302 | GQ120538 | GQ257515 |
| EU982305 | FJ432764 | FJ517268 | FJ610117 | FJ686739 | FJ686791 | FJ793310 | GQ120539 | GQ257516 |
| EU982306 | FJ445033 | FJ517270 | FJ610123 | FJ686740 | FJ686792 | FJ793318 | GQ120540 | GQ257517 |
| EU982307 | FJ445050 | FJ517271 | FJ610129 | FJ686741 | FJ686793 | FJ793326 | GQ120541 | GQ257518 |
| EU982310 | FJ445054 | FJ517272 | FJ610135 | FJ686742 | FJ686794 | FJ793334 | GQ120542 | GQ257519 |
| EU982318 | FJ445060 | FJ517273 | FJ610136 | FJ686743 | FJ686795 | FJ793342 | GQ120543 | GQ257520 |
| FJ031998 | FJ445061 | FJ517274 | FJ610137 | FJ686744 | FJ686797 | FJ793350 | GQ120544 | GQ257522 |
| FJ031999 | FJ445062 | FJ517291 | FJ610138 | FJ686745 | FJ686798 | FJ793358 | GQ120545 | GQ257523 |
| FJ032000 | FJ445063 | FJ517292 | FJ610139 | FJ686746 | FJ686799 | FJ793366 | GQ120546 | GQ257524 |
| FJ032002 | FJ445064 | FJ517293 | FJ610140 | FJ686747 | FJ686800 | FJ793374 | GQ120547 | GQ257525 |
| FJ032004 | FJ445065 | FJ517294 | FJ610141 | FJ686749 | FJ686801 | FJ793382 | GQ162788 | GQ257526 |
| FJ032005 | FJ445068 | FJ517295 | FJ648284 | FJ686750 | FJ686802 | FJ793390 | GQ176129 | GQ335468 |
| FJ349249 | FJ445070 | FJ517302 | FJ686698 | FJ686751 | FJ686803 | FJ793398 | GQ176130 | GQ335472 |
| FJ349250 | FJ445072 | FJ517332 | FJ686699 | FJ686752 | FJ686805 | FJ793406 | GQ176131 | GQ335481 |
| FJ349251 | FJ445075 | FJ519981 | FJ686701 | FJ686753 | FJ686806 | FJ793414 | GQ176132 | GQ335492 |
| FJ349252 | FJ445076 | FJ519985 | FJ686702 | FJ686754 | FJ686807 | FJ793422 | GQ176133 | GQ335500 |
| FJ349253 | FJ445079 | FJ520139 | FJ686703 | FJ686755 | FJ686808 | FJ793430 | GQ176135 | GQ335508 |
| FJ349254 | FJ445083 | FJ520140 | FJ686704 | FJ686757 | FJ686809 | FJ793438 | GQ184331 | GQ335516 |
| FJ357070 | FJ445084 | FJ520141 | FJ686705 | FJ686758 | FJ686810 | FJ793446 | GQ184332 | GQ373102 |
| FJ357071 | FJ445091 | FJ520147 | FJ686706 | FJ686759 | FJ686811 | FJ802403 | GQ184334 | GQ373103 |
| FJ357072 | FJ464613 | FJ520152 | FJ686707 | FJ686760 | FJ686813 | FJ985238 | GQ202037 | GQ373104 |
| FJ357073 | FJ464614 | FJ520154 | FJ686709 | FJ686761 | FJ686814 | FM179753 | GQ202057 | GQ373105 |
| FJ357074 | FJ464615 | FJ520156 | FJ686710 | FJ686762 | FJ686815 | FN773067 | GQ247843 | GQ373106 |
| FJ357075 | FJ464616 | FJ520159 | FJ686711 | FJ686763 | FJ686816 | FN773069 | GQ247850 | GQ373107 |
| FJ357076 | FJ464617 | FJ520161 | FJ686712 | FJ686765 | FJ686817 | FR771826 | GQ247852 | GQ373108 |

|          |          |          |          |          |          |          |          |          |
|----------|----------|----------|----------|----------|----------|----------|----------|----------|
| GQ373109 | GQ923263 | GU049937 | GU050576 | GU050637 | GU050774 | GU050826 | GU052314 | GU052757 |
| GQ373110 | GQ923271 | GU049945 | GU050578 | GU050638 | GU050775 | GU050827 | GU052316 | GU052765 |
| GQ373111 | GQ923279 | GU049969 | GU050579 | GU050719 | GU050776 | GU050829 | GU052317 | GU052773 |
| GQ373112 | GQ923287 | GU049988 | GU050580 | GU050725 | GU050777 | GU050830 | GU052318 | GU052781 |
| GQ373113 | GQ923295 | GU049996 | GU050581 | GU050726 | GU050778 | GU050831 | GU052319 | GU052789 |
| GQ373114 | GQ923303 | GU050017 | GU050582 | GU050727 | GU050779 | GU050832 | GU052320 | GU052797 |
| GQ373115 | GQ923311 | GU050032 | GU050583 | GU050728 | GU050781 | GU050833 | GU052345 | GU052823 |
| GQ373116 | GQ923319 | GU050061 | GU050585 | GU050729 | GU050782 | GU050834 | GU052382 | GU052825 |
| GQ373117 | GQ923327 | GU050069 | GU050586 | GU050730 | GU050783 | GU050836 | GU052384 | GU052826 |
| GQ373118 | GQ923335 | GU050084 | GU050587 | GU050731 | GU050784 | GU050837 | GU052385 | GU052827 |
| GQ404592 | GQ923343 | GU050092 | GU050588 | GU050732 | GU050785 | GU050838 | GU052386 | GU052828 |
| GQ404611 | GQ923351 | GU050107 | GU050589 | GU050733 | GU050786 | GU050839 | GU052387 | GU053031 |
| GQ404639 | GQ923359 | GU050114 | GU050590 | GU050734 | GU050788 | GU050840 | GU052405 | GU053033 |
| GQ404715 | GQ923367 | GU050122 | GU050592 | GU050735 | GU050789 | GU050841 | GU052519 | GU053034 |
| GQ404723 | GQ923375 | GU050130 | GU050593 | GU050736 | GU050790 | GU050843 | GU052521 | GU053035 |
| GQ414911 | GQ923383 | GU050138 | GU050594 | GU050737 | GU050791 | GU050844 | GU052522 | GU053036 |
| GQ414912 | GQ923391 | GU050153 | GU050595 | GU050739 | GU050792 | GU050845 | GU052523 | GU053037 |
| GQ414913 | GQ923399 | GU050161 | GU050596 | GU050740 | GU050793 | GU050846 | GU052524 | GU053188 |
| GQ414914 | GQ923407 | GU050176 | GU050597 | GU050741 | GU050795 | GU050847 | GU052525 | GU053195 |
| GQ414915 | GQ923415 | GU050191 | GU050599 | GU050742 | GU050796 | GU050848 | GU052542 | GU053210 |
| GQ414916 | GQ923423 | GU050199 | GU050600 | GU050743 | GU050797 | GU050850 | GU052550 | GU053292 |
| GQ414917 | GQ923431 | GU050207 | GU050601 | GU050744 | GU050798 | GU050851 | GU052558 | GU053293 |
| GQ414918 | GQ923439 | GU050215 | GU050602 | GU050746 | GU050799 | GU050852 | GU052566 | GU053294 |
| GQ414919 | GQ923447 | GU050223 | GU050603 | GU050747 | GU050800 | GU050853 | GU052574 | GU053295 |
| GQ414920 | GQ923455 | GU050236 | GU050604 | GU050748 | GU050802 | GU050854 | GU052582 | GU053296 |
| GQ414921 | GQ923463 | GU050244 | GU050606 | GU050749 | GU050803 | GU050855 | GU052590 | GU053445 |
| GQ414922 | GQ923471 | GU050252 | GU050607 | GU050750 | GU050804 | GU050856 | GU052598 | GU053447 |
| GQ414923 | GQ923479 | GU050260 | GU050608 | GU050751 | GU050805 | GU050857 | GU052606 | GU053448 |
| GQ415319 | GQ923487 | GU050267 | GU050609 | GU050753 | GU050806 | GU050858 | GU052614 | GU053449 |
| GQ910930 | GQ923495 | GU050281 | GU050610 | GU050754 | GU050807 | GU050859 | GU052630 | GU053450 |
| GQ923135 | GQ923503 | GU050289 | GU050611 | GU050755 | GU050809 | GU051943 | GU052638 | GU053451 |
| GQ923143 | GQ923511 | GU050297 | GU050613 | GU050756 | GU050810 | GU051995 | GU052646 | GU053461 |
| GQ923151 | GQ923519 | GU050304 | GU050614 | GU050757 | GU050811 | GU052015 | GU052653 | GU053469 |
| GQ923159 | GQ923527 | GU050556 | GU050615 | GU050758 | GU050812 | GU052016 | GU052661 | GU053476 |
| GQ923167 | GQ923535 | GU050562 | GU050616 | GU050760 | GU050813 | GU052017 | GU052669 | GU053483 |
| GQ923175 | GQ923543 | GU050564 | GU050617 | GU050761 | GU050814 | GU052191 | GU052677 | GU053491 |
| GQ923183 | GQ923551 | GU050565 | GU050625 | GU050762 | GU050816 | GU052193 | GU052684 | GU053498 |
| GQ923191 | GQ923559 | GU050566 | GU050627 | GU050763 | GU050817 | GU052194 | GU052692 | GU053499 |
| GQ923199 | GU046783 | GU050567 | GU050628 | GU050764 | GU050818 | GU052195 | GU052700 | GU053500 |
| GQ923207 | GU049874 | GU050568 | GU050629 | GU050765 | GU050819 | GU052196 | GU052708 | GU053501 |
| GQ923215 | GU049882 | GU050569 | GU050630 | GU050767 | GU050820 | GU052198 | GU052715 | GU053502 |
| GQ923223 | GU049890 | GU050571 | GU050631 | GU050768 | GU050821 | GU052199 | GU052721 | GU053503 |
| GQ923231 | GU049898 | GU050572 | GU050632 | GU050769 | GU050822 | GU052200 | GU052727 | GU053504 |
| GQ923239 | GU049906 | GU050573 | GU050634 | GU050770 | GU050823 | GU052201 | GU052734 | GU053507 |
| GQ923247 | GU049914 | GU050574 | GU050635 | GU050771 | GU050824 | GU052202 | GU052741 | GU053513 |
| GQ923255 | GU049922 | GU050575 | GU050636 | GU050772 | GU050825 | GU052277 | GU052749 | GU053514 |

|          |          |          |          |          |          |          |          |          |
|----------|----------|----------|----------|----------|----------|----------|----------|----------|
| GU053516 | GU186454 | GU361246 | HM060026 | HM144623 | HM144688 | HM204778 | HQ143708 | HQ398362 |
| GU053517 | GU186540 | GU361247 | HM060027 | HM144624 | HM144689 | HM204779 | HQ143709 | HQ425335 |
| GU053518 | GU186546 | GU361248 | HM060058 | HM144625 | HM144690 | HM214623 | HQ143710 | HQ541743 |
| GU053519 | GU186552 | GU361249 | HM060061 | HM144626 | HM144691 | HM214624 | HQ143711 | HQ825168 |
| GU053520 | GU186559 | GU361250 | HM144566 | HM144627 | HM144692 | HM214625 | HQ143712 | HQ825176 |
| GU053521 | GU186567 | GU361251 | HM144567 | HM144628 | HM144693 | HM214626 | HQ143713 | HQ871935 |
| GU053522 | GU186575 | GU361252 | HM144568 | HM144629 | HM144694 | HM214627 | HQ143714 | J02127   |
| GU053523 | GU186589 | GU361253 | HM144569 | HM144631 | HM144695 | HM214628 | HQ143715 | J02155   |
| GU053524 | GU186622 | GU361254 | HM144570 | HM144635 | HM144696 | HM214629 | HQ143716 | J02157   |
| GU053525 | GU186709 | GU361255 | HM144571 | HM144636 | HM144697 | HM370051 | HQ143717 | JF323008 |
| GU053526 | GU186711 | GU361256 | HM144572 | HM144642 | HM144698 | HM370058 | HQ143718 | JF323009 |
| GU053527 | GU186712 | GU361257 | HM144573 | HM144643 | HM144699 | HM370115 | HQ143719 | JF327327 |
| GU064950 | GU186713 | GU361258 | HM144574 | HM144645 | HM144700 | HM370117 | HQ143720 | JF327329 |
| GU071969 | GU186714 | GU361259 | HM144575 | HM144648 | HM165464 | HM370118 | HQ185385 | JF327330 |
| GU071970 | GU186715 | GU361260 | HM144576 | HM144654 | HM165465 | HM370119 | HQ221658 | JF327331 |
| GU071971 | GU247932 | GU361261 | HM144577 | HM144655 | HM165466 | HM370121 | HQ221659 | JF327332 |
| GU071972 | GU247933 | GU361262 | HM144578 | HM144656 | HM165467 | HM370124 | HQ221660 | JF327333 |
| GU071973 | GU247934 | GU361263 | HM144579 | HM144658 | HM165468 | HM370125 | HQ221661 | JF327334 |
| GU086243 | GU247935 | GU361264 | HM144580 | HM144659 | HM165469 | HM370128 | HQ221662 | JF327335 |
| GU086244 | GU247936 | GU361265 | HM144581 | HM144660 | HM165470 | HM533969 | HQ221663 | JF327337 |
| GU086245 | GU247937 | GU361266 | HM144582 | HM144661 | HM165471 | HM589202 | HQ221664 | JF327338 |
| GU086246 | GU247938 | GU361267 | HM144583 | HM144662 | HM165472 | HM589203 | HQ221665 | JF327339 |
| GU086247 | GU247939 | GU361268 | HM144584 | HM144663 | HM165473 | HM589204 | HQ221666 | JF327340 |
| GU086248 | GU247940 | GU361269 | HM144585 | HM144664 | HM193553 | HM589205 | HQ221667 | JF327341 |
| GU086249 | GU247941 | GU722370 | HM144597 | HM144665 | HM193623 | HM589206 | HQ221668 | JF327342 |
| GU121384 | GU247942 | GU722371 | HM144600 | HM144666 | HM193630 | HM589208 | HQ221669 | JF519776 |
| GU122056 | GU247943 | GU722372 | HM144601 | HM144667 | HM193631 | HM589209 | HQ221670 | JF519777 |
| GU122057 | GU247944 | GU722373 | HM144602 | HM144668 | HM193632 | HM590764 | HQ221671 | JF519778 |
| GU122058 | GU247945 | GU722374 | HM144603 | HM144669 | HM193633 | HM590774 | HQ221672 | JF519779 |
| GU122059 | GU247946 | GU722375 | HM144604 | HM144670 | HM193634 | HM745400 | HQ221673 | JF519780 |
| GU122060 | GU247947 | GU722376 | HM144605 | HM144671 | HM193635 | HM751156 | HQ221674 | JF519781 |
| GU122061 | GU351860 | GU722377 | HM144607 | HM144672 | HM193636 | HM751164 | HQ221675 | JF519782 |
| GU122062 | GU361232 | GU722378 | HM144608 | HM144673 | HM193674 | HM751172 | HQ225838 | JF519783 |
| GU122063 | GU361233 | GU722379 | HM144609 | HM144674 | HM193717 | HM751180 | HQ244432 | JF519784 |
| GU122064 | GU361234 | GU722380 | HM144610 | HM144675 | HM193773 | HM751188 | HQ285888 | JF519785 |
| GU122066 | GU361235 | GU724155 | HM144611 | HM144676 | HM193793 | HM751196 | HQ326723 | JF519786 |
| GU122067 | GU361236 | GU826676 | HM144612 | HM144677 | HM193837 | HM849013 | HQ378728 | JF795040 |
| GU168166 | GU361237 | HE802717 | HM144614 | HM144678 | HM204767 | HM855266 | HQ398339 | JF795048 |
| GU168227 | GU361238 | HE802725 | HM144615 | HM144679 | HM204768 | HM855267 | HQ398340 | JF795056 |
| GU168274 | GU361239 | HM036347 | HM144616 | HM144680 | HM204770 | HM855268 | HQ398341 | JF795064 |
| GU168294 | GU361240 | HM059929 | HM144617 | HM144681 | HM204771 | HM855269 | HQ398342 | JF795072 |
| GU168329 | GU361241 | HM059965 | HM144618 | HM144682 | HM204772 | HM855270 | HQ398343 | JF795080 |
| GU168376 | GU361242 | HM059979 | HM144619 | HM144684 | HM204773 | HQ014754 | HQ398344 | JF795088 |
| GU168431 | GU361243 | HM059999 | HM144620 | HM144685 | HM204774 | HQ014834 | HQ398345 | JF795096 |
| GU168502 | GU361244 | HM060022 | HM144621 | HM144686 | HM204775 | HQ117888 | HQ398346 | JF795104 |
| GU186448 | GU361245 | HM060025 | HM144622 | HM144687 | HM204776 | HQ143707 | HQ398347 | JF795112 |

|          |          |          |          |          |          |          |          |          |
|----------|----------|----------|----------|----------|----------|----------|----------|----------|
| JF795138 | JF816620 | JF965311 | JN653642 | JQ356877 | JQ916910 | JX456187 | JX566216 | K00867   |
| JF795146 | JF816622 | JF965312 | JN653643 | JQ405084 | JQ916911 | JX456188 | JX566222 | K00868   |
| JF816562 | JF816624 | JF965313 | JN653644 | JQ409042 | JQ916912 | JX456189 | JX566225 | K00869   |
| JF816563 | JF816625 | JF965314 | JN653645 | JQ419726 | JQ916913 | JX456190 | JX566227 | K00870   |
| JF816564 | JF816626 | JF965315 | JN653646 | JQ419727 | JQ924799 | JX465625 | JX566230 | K00873   |
| JF816566 | JF816627 | JF965316 | JN653647 | JQ419728 | JQ952592 | JX485428 | JX566236 | K00875   |
| JF816568 | JF816628 | JF965317 | JN653648 | JQ419729 | JQ952593 | JX499152 | JX570813 | K00876   |
| JF816569 | JF816630 | JF965318 | JN653649 | JQ419730 | JQ952594 | JX507357 | JX570821 | K01006   |
| JF816570 | JF816632 | JF965319 | JN653650 | JQ611706 | JQ952595 | JX565021 | JX570832 | K01012   |
| JF816571 | JF816633 | JN087022 | JN653651 | JQ639780 | JQ990146 | JX566175 | JX570840 | K01140   |
| JF816572 | JF816634 | JN087090 | JN653652 | JQ639788 | JX030408 | JX566177 | JX570848 | KC162235 |
| JF816574 | JF816635 | JN087098 | JN653653 | JQ737223 | JX069083 | JX566178 | JX570856 | KC190175 |
| JF816576 | JF816636 | JN087106 | JN683631 | JQ770144 | JX069091 | JX566179 | JX570864 | KC190181 |
| JF816577 | JF816638 | JN087138 | JN683639 | JQ770145 | JX069099 | JX566180 | JX673923 | KC209497 |
| JF816578 | JF816640 | JN087170 | JN683648 | JQ770146 | JX069107 | JX566181 | JX673929 | KC261671 |
| JF816579 | JF816641 | JN087178 | JN683649 | JQ770147 | JX081128 | JX566182 | JX673936 | KC282881 |
| JF816580 | JF816642 | JN087186 | JN683650 | JQ770148 | JX081130 | JX566183 | JX826513 | KC342595 |
| JF816582 | JF816643 | JN087290 | JN683651 | JQ770149 | JX081131 | JX566185 | JX912288 | KC342597 |
| JF816584 | JF816644 | JN087298 | JN683652 | JQ770150 | JX081142 | JX566186 | JX912983 | KC342611 |
| JF816585 | JF816646 | JN244206 | JN683653 | JQ770151 | JX081143 | JX566187 | JX912989 | KC342613 |
| JF816586 | JF816648 | JN540059 | JN706702 | JQ770152 | JX081144 | JX566188 | JX912996 | KC342615 |
| JF816587 | JF816649 | JN540067 | JN828572 | JQ770153 | JX081145 | JX566189 | K00578   | KC342617 |
| JF816588 | JF816650 | JN540075 | JN852781 | JQ770154 | JX081146 | JX566190 | K00843   | KC342621 |
| JF816590 | JF816651 | JN543568 | JN852789 | JQ770155 | JX081147 | JX566191 | K00844   | KC417052 |
| JF816592 | JF816652 | JN543569 | JN852797 | JQ770156 | JX081174 | JX566192 | K00845   | KC417053 |
| JF816593 | JF816654 | JN543570 | JN852805 | JQ770157 | JX081175 | JX566193 | K00846   | KC417054 |
| JF816594 | JF816656 | JN543571 | JN869518 | JQ770158 | JX081176 | JX566194 | K00847   | KC464600 |
| JF816595 | JF816657 | JN543572 | JN869525 | JQ770159 | JX081177 | JX566195 | K00848   | KC492384 |
| JF816596 | JF906208 | JN543573 | JN869532 | JQ770160 | JX094860 | JX566196 | K00849   | KC492392 |
| JF816598 | JF916707 | JN575028 | JN869540 | JQ770161 | JX175255 | JX566198 | K00850   | KC492400 |
| JF816600 | JF916715 | JN575030 | JN869548 | JQ770162 | JX286593 | JX566199 | K00851   | KC492408 |
| JF816601 | JF916723 | JN575034 | JQ041407 | JQ770163 | JX297581 | JX566200 | K00852   | KC492416 |
| JF816602 | JF917105 | JN596872 | JQ041408 | JQ901670 | JX297589 | JX566201 | K00853   | KC492438 |
| JF816603 | JF965298 | JN596873 | JQ041409 | JQ901671 | JX310068 | JX566202 | K00854   | KC541697 |
| JF816604 | JF965299 | JN596874 | JQ041410 | JQ901672 | JX310069 | JX566203 | K00855   | KC555078 |
| JF816606 | JF965300 | JN596875 | JQ254936 | JQ901673 | JX310070 | JX566204 | K00856   | KC555086 |
| JF816608 | JF965301 | JN596876 | JQ254939 | JQ901674 | JX312544 | JX566205 | K00857   | KC555094 |
| JF816609 | JF965302 | JN596877 | JQ254943 | JQ901675 | JX437690 | JX566206 | K00858   | KC555102 |
| JF816610 | JF965303 | JN605380 | JQ254946 | JQ901676 | JX444797 | JX566207 | K00859   | KC599285 |
| JF816611 | JF965304 | JN605381 | JQ254949 | JQ901677 | JX444805 | JX566208 | K00860   | KC599314 |
| JF816612 | JF965305 | JN627141 | JQ254951 | JQ901678 | JX444813 | JX566209 | K00861   | KC608159 |
| JF816614 | JF965306 | JN627142 | JQ254955 | JQ901679 | JX444821 | JX566210 | K00862   | KC693642 |
| JF816616 | JF965307 | JN653638 | JQ307201 | JQ901680 | JX456183 | JX566211 | K00863   | KC703331 |
| JF816617 | JF965308 | JN653639 | JQ307202 | JQ904458 | JX456184 | JX566212 | K00864   | KC703339 |
| JF816618 | JF965309 | JN653640 | JQ356875 | JQ905260 | JX456185 | JX566213 | K00865   | KC757785 |
| JF816619 | JF965310 | JN653641 | JQ356876 | JQ916909 | JX456186 | JX566214 | K00866   | KC757800 |

|          |          |          |          |          |          |          |          |        |
|----------|----------|----------|----------|----------|----------|----------|----------|--------|
| KC757822 | KF013904 | KF188360 | KF259490 | KF259536 | KF259582 | KM402813 | KP098417 | L11142 |
| KC757829 | KF013912 | KF188362 | KF259491 | KF259537 | KF259583 | KM885170 | KP098418 | L20406 |
| KC757837 | KF013920 | KF188368 | KF259492 | KF259538 | KF259584 | KM885171 | KP098419 | L20407 |
| KC757853 | KF013928 | KF188372 | KF259493 | KF259539 | KF259585 | KM885172 | KP098420 | L20408 |
| KC757874 | KF013936 | KF188374 | KF259494 | KF259540 | KF259586 | KM885173 | KP098421 | L20409 |
| KC757890 | KF013944 | KF188376 | KF259495 | KF259541 | KF259587 | KM885174 | KP098422 | L20410 |
| KC757912 | KF142483 | KF188378 | KF259496 | KF259542 | KF259588 | KM885175 | KP098423 | L46850 |
| KC757948 | KF150636 | KF188384 | KF259497 | KF259543 | KF259589 | KM885176 | KP098424 | M11925 |
| KC757964 | KF188237 | KF188388 | KF259498 | KF259544 | KF259590 | KM885177 | KP098425 | M12051 |
| KC757972 | KF188239 | KF188390 | KF259499 | KF259545 | KF259591 | KM885178 | KP098426 | M12590 |
| KC757988 | KF188241 | KF188392 | KF259500 | KF259546 | KF259592 | KP098381 | KP098427 | M12591 |
| KC757996 | KF188245 | KF188394 | KF259501 | KF259547 | KF259593 | KP098382 | KP098428 | M12595 |
| KC758012 | KF188251 | KF188396 | KF259502 | KF259548 | KF259594 | KP098383 | KP098429 | M12699 |
| KC758027 | KF188255 | KF188398 | KF259503 | KF259549 | KF259595 | KP098384 | KP098430 | M14921 |
| KC758035 | KF188257 | KF188400 | KF259504 | KF259550 | KF259596 | KP098385 | KP098431 | M14922 |
| KC758042 | KF188259 | KF188402 | KF259505 | KF259551 | KF297304 | KP098386 | KP098432 | M16564 |
| KC758050 | KF188261 | KF188404 | KF259506 | KF259552 | KF297305 | KP098387 | KP098433 | M23968 |
| KC758057 | KF188267 | KF193388 | KF259507 | KF259553 | KF297306 | KP098388 | KP098434 | M23970 |
| KC758103 | KF188271 | KF193396 | KF259508 | KF259554 | KF297307 | KP098389 | KP098435 | M23972 |
| KC767261 | KF188275 | KF259463 | KF259509 | KF259555 | KF297308 | KP098390 | KP098436 | M23974 |
| KC768045 | KF188277 | KF259464 | KF259510 | KF259556 | KF297309 | KP098391 | KP098437 | M23976 |
| KC768046 | KF188279 | KF259465 | KF259511 | KF259557 | KF367733 | KP098392 | KP098438 | M23978 |
| KC768047 | KF188281 | KF259466 | KF259512 | KF259558 | KF367740 | KP098393 | KP098439 | M25376 |
| KC784971 | KF188284 | KF259467 | KF259513 | KF259559 | KF435064 | KP098394 | KP098440 | M25924 |
| KC785008 | KF188286 | KF259468 | KF259514 | KF259560 | KF500979 | KP098395 | KP098441 | M25926 |
| KC785016 | KF188288 | KF259469 | KF259515 | KF259561 | KF695236 | KP098396 | KP098442 | M25933 |
| KC785046 | KF188296 | KF259470 | KF259516 | KF259562 | KF695237 | KP098397 | KP098443 | M26078 |
| KC785067 | KF188300 | KF259471 | KF259517 | KF259563 | KF695238 | KP098398 | KP098444 | M26079 |
| KC895599 | KF188306 | KF259472 | KF259518 | KF259564 | KF695240 | KP098399 | L07354   | M26083 |
| KC895607 | KF188310 | KF259473 | KF259519 | KF259565 | KF695242 | KP098400 | L11125   | M27521 |
| KC895615 | KF188312 | KF259474 | KF259520 | KF259566 | KF695243 | KP098401 | L11126   | M30762 |
| KC895623 | KF188322 | KF259475 | KF259521 | KF259567 | KM402798 | KP098402 | L11127   | M30767 |
| KC895645 | KF188324 | KF259476 | KF259522 | KF259568 | KM402799 | KP098403 | L11128   | M30768 |
| KC895659 | KF188326 | KF259477 | KF259523 | KF259569 | KM402800 | KP098404 | L11129   | M36812 |
| KC895674 | KF188330 | KF259478 | KF259524 | KF259570 | KM402801 | KP098405 | L11130   | M54941 |
| KC895682 | KF188332 | KF259479 | KF259525 | KF259571 | KM402802 | KP098406 | L11131   | M57670 |
| KC895689 | KF188334 | KF259480 | KF259526 | KF259572 | KM402803 | KP098407 | L11132   | M60800 |
| KC895697 | KF188336 | KF259481 | KF259527 | KF259573 | KM402804 | KP098408 | L11133   | M63519 |
| KC895703 | KF188338 | KF259482 | KF259528 | KF259574 | KM402805 | KP098409 | L11134   | M63522 |
| KC895718 | KF188340 | KF259483 | KF259529 | KF259575 | KM402806 | KP098410 | L11135   | M63531 |
| KC895726 | KF188342 | KF259484 | KF259530 | KF259576 | KM402807 | KP098411 | L11136   | M63537 |
| KC895734 | KF188344 | KF259485 | KF259531 | KF259577 | KM402808 | KP098412 | L11137   | M63749 |
| KC895742 | KF188346 | KF259486 | KF259532 | KF259578 | KM402809 | KP098413 | L11138   | M63752 |
| KC895750 | KF188348 | KF259487 | KF259533 | KF259579 | KM402810 | KP098414 | L11139   | M63753 |
| KC951124 | KF188354 | KF259488 | KF259534 | KF259580 | KM402811 | KP098415 | L11140   | M63756 |
| KC986292 | KF188358 | KF259489 | KF259535 | KF259581 | KM402812 | KP098416 | L11141   | M63758 |

|        |        |        |        |        |           |           |        |
|--------|--------|--------|--------|--------|-----------|-----------|--------|
| M63762 | M76608 | M80959 | M81573 | M81580 | M81586    | NC_007359 | U85392 |
| M63763 | M80943 | M80961 | M81574 | M81581 | M81587    | NC_007360 | U96737 |
| M63768 | M80945 | M80964 | M81575 | M81582 | M91712    | NC_007363 | U96745 |
| M73521 | M80951 | M81570 | M81577 | M81583 | M91713    | NC_007364 | X08093 |
| M73524 | M80956 | M81571 | M81578 | M81584 | NC_007357 | U49485    | X53029 |
| M76607 | M80957 | M81572 | M81579 | M81585 | NC_007358 | U52939    |        |
